# Supplementary material for: Pan-cancer molecular analysis of the RB tumor suppressor pathway
Source: PubMed Central journal article supplement (PMC7118159; doi:10.1038/s42003-020-0873-9), 2020-04-02
Supplement: 42003_2020_873_MOESM1_ESM.pdf [file 42003_2020_873_MOESM1_ESM.pdf]

| Study Abbreviation | Study Name                                                       | No. of Samples |
|--------------------|------------------------------------------------------------------|----------------|
| LAML               | Acute Myeloid Leukemia                                           | 173            |
| ACC                | Adrenocortical carcinoma                                         | 78             |
| BLCA               | Bladder Urothelial Carcinoma                                     | 407            |
| LGG                | Brain Lower Grade Glioma                                         | 514            |
| BRCA               | Breast invasive carcinoma                                        | 1082           |
| CESC               | Cervical squamous cell carcinoma and endocervical adenocarcinoma | 294            |
| CHOL               | Cholangiocarcinoma                                               | 36             |
| COAD               | Colon adenocarcinoma                                             | 592            |
| ESCA               | Esophageal carcinoma                                             | 181            |
| GBM                | Glioblastoma multiforme                                          | 160            |
| HNSC               | Head and Neck squamous cell carcinoma                            | 515            |
| KICH               | Kidney Chromophobe                                               | 65             |
| KIRC               | Kidney renal clear cell carcinoma                                | 510            |
| KIRP               | Kidney renal papillary cell carcinoma                            | 283            |
| LIHC               | Liver hepatocellular carcinoma                                   | 366            |
| LUAD               | Lung adenocarcinoma                                              | 510            |
| LUSC               | Lung squamous cell carcinoma                                     | 484            |
| DLBC               | Lymphoid Neoplasm Diffuse Large B-cell Lymphoma                  | 48             |
| MESO               | Mesothelioma                                                     | 87             |
| OV                 | Ovarian serous cystadenocarcinoma                                | 300            |
| PAAD               | Pancreatic adenocarcinoma                                        | 177            |
| PCPG               | Pheochromocytoma and Paraganglioma                               | 178            |
| PRAD               | Prostate adenocarcinoma                                          | 493            |
| SARC               | Sarcoma                                                          | 253            |
| SKCM               | Skin Cutaneous Melanoma                                          | 443            |
| STAD               | Stomach adenocarcinoma                                           | 412            |
| TGCT               | Testicular Germ Cell Tumors                                      | 149            |
| THYM               | Thymoma                                                          | 119            |
| THCA               | Thyroid carcinoma                                                | 498            |
| UCS                | Uterine Carcinosarcoma                                           | 57             |
| UCEC               | Uterine Corpus Endometrial Carcinoma                             | 527            |
| UVM                | Uveal Melanoma                                                   | 80             |

**Supplementary Figure 1:** The pan-Cancer TCGA datasets and the corresponding acronym for each disease site are listed as per the TCGA. The number of samples per data set is provided in the table.

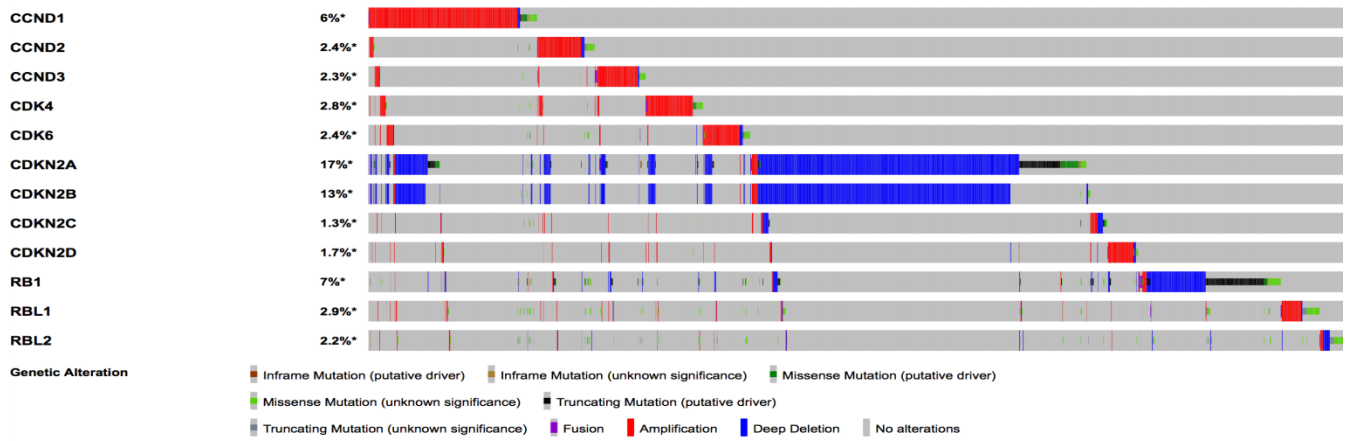

**Supplementary Figure 2:** An oncoprint of the indicated RB-pathway associated genes is shown in the upper panel from all cases within the pan-cancer data sets combined.

## SARC

| A      | B      | Neither | A Not B | B Not A | Both | Log2 Odds Ratio | p-Value | q-Value | Tendency           |
|--------|--------|---------|---------|---------|------|-----------------|---------|---------|--------------------|
| RB1    | CDKN2A | 152     | 62      | 38      | 1    | <-3             | <0.001  | <0.001  | Mutual exclusivity |
| RB1    | CCND1  | 184     | 61      | 6       | 2    | 0.008           | 0.634   | 0.76    | Co-occurrence      |
| RB1    | CDK4   | 145     | 63      | 45      | 0    | <-3             | <0.001  | <0.001  | Mutual exclusivity |
| RB1    | CDK6   | 187     | 62      | 3       | 1    | 0.008           | 0.684   | 0.76    | Co-occurrence      |
| CDKN2A | CCND1  | 208     | 37      | 6       | 2    | 0.906           | 0.356   | 0.7     | Co-occurrence      |
| CDKN2A | CDK4   | 172     | 36      | 42      | 3    | -1.551          | 0.051   | 0.171   | Mutual exclusivity |
| CDKN2A | CDK6   | 211     | 38      | 3       | 1    | 0.888           | 0.49    | 0.7     | Co-occurrence      |
| CCND1  | CDK4   | 203     | 5       | 42      | 3    | 1.536           | 0.153   | 0.384   | Co-occurrence      |
| CCND1  | CDK6   | 241     | 8       | 4       | 0    | <-3             | 0.879   | 0.879   | Mutual exclusivity |
| CDK4   | CDK6   | 204     | 45      | 4       | 0    | <-3             | 0.454   | 0.7     | Mutual exclusivity |

## LUAD

| A      | B      | Neither | A Not B | B Not A | Both | Log2 Odds Ratio | p-Value | q-Value | Tendency           |
|--------|--------|---------|---------|---------|------|-----------------|---------|---------|--------------------|
| RB1    | CDKN2A | 365     | 37      | 105     | 0    | <-3             | <0.001  | 0.001   | Mutual exclusivity |
| RB1    | CCND1  | 453     | 35      | 17      | 2    | 0.607           | 0.411   | 0.654   | Co-occurrence      |
| RB1    | CDK4   | 441     | 35      | 29      | 2    | -0.203          | 0.602   | 0.654   | Mutual exclusivity |
| RB1    | CDK6   | 460     | 36      | 10      | 1    | 0.354           | 0.569   | 0.654   | Co-occurrence      |
| CDKN2A | CCND1  | 393     | 95      | 9       | 10   | 2.201           | 0.002   | 0.008   | Co-occurrence      |
| CDKN2A | CDK4   | 376     | 100     | 26      | 5    | -0.468          | 0.35    | 0.654   | Mutual exclusivity |
| CDKN2A | CDK6   | 393     | 103     | 9       | 2    | -0.238          | 0.594   | 0.654   | Mutual exclusivity |
| CCND1  | CDK4   | 461     | 15      | 27      | 4    | 2.187           | 0.023   | 0.077   | Co-occurrence      |
| CCND1  | CDK6   | 477     | 19      | 11      | 0    | <-3             | 0.654   | 0.654   | Mutual exclusivity |
| CDK4   | CDK6   | 466     | 30      | 10      | 1    | 0.635           | 0.504   | 0.654   | Co-occurrence      |

## BRCA

| A      | B      | Neither | A Not B | B Not A | Both | Log2 Odds Ratio | p-Value | q-Value | Tendency           |
|--------|--------|---------|---------|---------|------|-----------------|---------|---------|--------------------|
| RB1    | CDKN2A | 883     | 63      | 47      | 3    | -0.161          | 0.574   | 0.574   | Mutual exclusivity |
| RB1    | CCND1  | 777     | 62      | 153     | 4    | -1.61           | 0.013   | 0.13    | Mutual exclusivity |
| RB1    | CDK4   | 916     | 66      | 14      | 0    | <-3             | 0.38    | 0.573   | Mutual exclusivity |
| RB1    | CDK6   | 920     | 66      | 10      | 0    | <-3             | 0.502   | 0.573   | Mutual exclusivity |
| CDKN2A | CCND1  | 794     | 45      | 152     | 5    | -0.785          | 0.172   | 0.431   | Mutual exclusivity |
| CDKN2A | CDK4   | 933     | 49      | 13      | 1    | 0.551           | 0.516   | 0.573   | Co-occurrence      |
| CDKN2A | CDK6   | 937     | 49      | 9       | 1    | 1.087           | 0.404   | 0.573   | Co-occurrence      |
| CCND1  | CDK4   | 830     | 152     | 9       | 5    | 1.601           | 0.055   | 0.275   | Co-occurrence      |
| CCND1  | CDK6   | 830     | 156     | 9       | 1    | -0.758          | 0.516   | 0.573   | Mutual exclusivity |
| CDK4   | CDK6   | 973     | 13      | 9       | 1    | >3              | 0.133   | 0.431   | Co-occurrence      |

## BLCA

| A      | B      | Neither | A Not B | B Not A | Both | Log2 Odds Ratio | p-Value | q-Value | Tendency           |
|--------|--------|---------|---------|---------|------|-----------------|---------|---------|--------------------|
| RB1    | CDKN2A | 152     | 95      | 150     | 9    | <-3             | <0.001  | <0.001  | Mutual exclusivity |
| RB1    | CCND1  | 256     | 101     | 46      | 3    | -2.597          | <0.001  | <0.001  | Mutual exclusivity |
| RB1    | CDK4   | 296     | 101     | 6       | 3    | 0.551           | 0.417   | 0.695   | Co-occurrence      |
| RB1    | CDK6   | 294     | 101     | 8       | 3    | 0.126           | 0.566   | 0.761   | Co-occurrence      |
| CDKN2A | CCND1  | 229     | 128     | 18      | 31   | 1.623           | <0.001  | <0.001  | Co-occurrence      |
| CDKN2A | CDK4   | 239     | 158     | 8       | 1    | -2.403          | 0.075   | 0.188   | Mutual exclusivity |
| CDKN2A | CDK6   | 239     | 156     | 8       | 3    | -0.8            | 0.314   | 0.627   | Mutual exclusivity |
| CCND1  | CDK4   | 349     | 48      | 8       | 1    | -0.138          | 0.703   | 0.779   | Mutual exclusivity |
| CCND1  | CDK6   | 347     | 48      | 10      | 1    | -0.468          | 0.609   | 0.761   | Mutual exclusivity |
| CDK4   | CDK6   | 386     | 9       | 11      | 0    | <-3             | 0.779   | 0.779   | Mutual exclusivity |

## LUSC

| A      | B      | Neither | A Not B | B Not A | Both | Log2 Odds Ratio | p-Value | q-Value | Tendency           |
|--------|--------|---------|---------|---------|------|-----------------|---------|---------|--------------------|
| RB1    | CDKN2A | 225     | 46      | 196     | 2    | <-3             | <0.001  | <0.001  | Mutual exclusivity |
| RB1    | CCND1  | 361     | 46      | 60      | 2    | -1.935          | 0.031   | 0.105   | Mutual exclusivity |
| RB1    | CDK4   | 418     | 48      | 3       | 0    | <-3             | 0.723   | 0.803   | Mutual exclusivity |
| RB1    | CDK6   | 395     | 47      | 26      | 1    | -1.629          | 0.212   | 0.425   | Mutual exclusivity |
| CDKN2A | CCND1  | 247     | 160     | 24      | 38   | 1.289           | <0.001  | 0.005   | Co-occurrence      |
| CDKN2A | CDK4   | 269     | 197     | 2       | 1    | -0.551          | 0.616   | 0.803   | Mutual exclusivity |
| CDKN2A | CDK6   | 254     | 188     | 17      | 10   | -0.331          | 0.363   | 0.604   | Mutual exclusivity |
| CCND1  | CDK4   | 404     | 62      | 3       | 0    | <-3             | 0.653   | 0.803   | Mutual exclusivity |
| CCND1  | CDK6   | 386     | 56      | 21      | 6    | 0.978           | 0.131   | 0.327   | Co-occurrence      |
| CDK4   | CDK6   | 439     | 3       | 27      | 0    | <-3             | 0.837   | 0.837   | Mutual exclusivity |

## HNSC

| A      | B      | Neither | A Not B | B Not A | Both | Log2 Odds Ratio | p-Value | q-Value | Tendency           |
|--------|--------|---------|---------|---------|------|-----------------|---------|---------|--------------------|
| RB1    | CDKN2A | 226     | 16      | 248     | 6    | -1.549          | 0.018   | 0.09    | Mutual exclusivity |
| RB1    | CCND1  | 358     | 20      | 116     | 2    | -1.696          | 0.073   | 0.145   | Mutual exclusivity |
| RB1    | CDK4   | 467     | 21      | 7       | 1    | 1.668           | 0.306   | 0.437   | Co-occurrence      |
| RB1    | CDK6   | 452     | 21      | 22      | 1    | -0.032          | 0.729   | 0.729   | Mutual exclusivity |
| CDKN2A | CCND1  | 206     | 172     | 36      | 82   | 1.448           | <0.001  | <0.001  | Co-occurrence      |
| CDKN2A | CDK4   | 236     | 252     | 6       | 2    | -1.68           | 0.127   | 0.212   | Mutual exclusivity |
| CDKN2A | CDK6   | 231     | 242     | 11      | 12   | 0.058           | 0.548   | 0.671   | Co-occurrence      |
| CCND1  | CDK4   | 372     | 116     | 6       | 2    | 0.096           | 0.604   | 0.671   | Co-occurrence      |
| CCND1  | CDK6   | 364     | 109     | 14      | 9    | 1.102           | 0.069   | 0.145   | Co-occurrence      |
| CDK4   | CDK6   | 467     | 6       | 21      | 2    | 2.89            | 0.049   | 0.145   | Co-occurrence      |

**Supplementary Figure 3:** Analysis of mutual exclusive or co-occurring relationships in representative tumor types that exhibit frequent RB1 loss/mutation. The log-odds ratio and associated p-value are summarized.

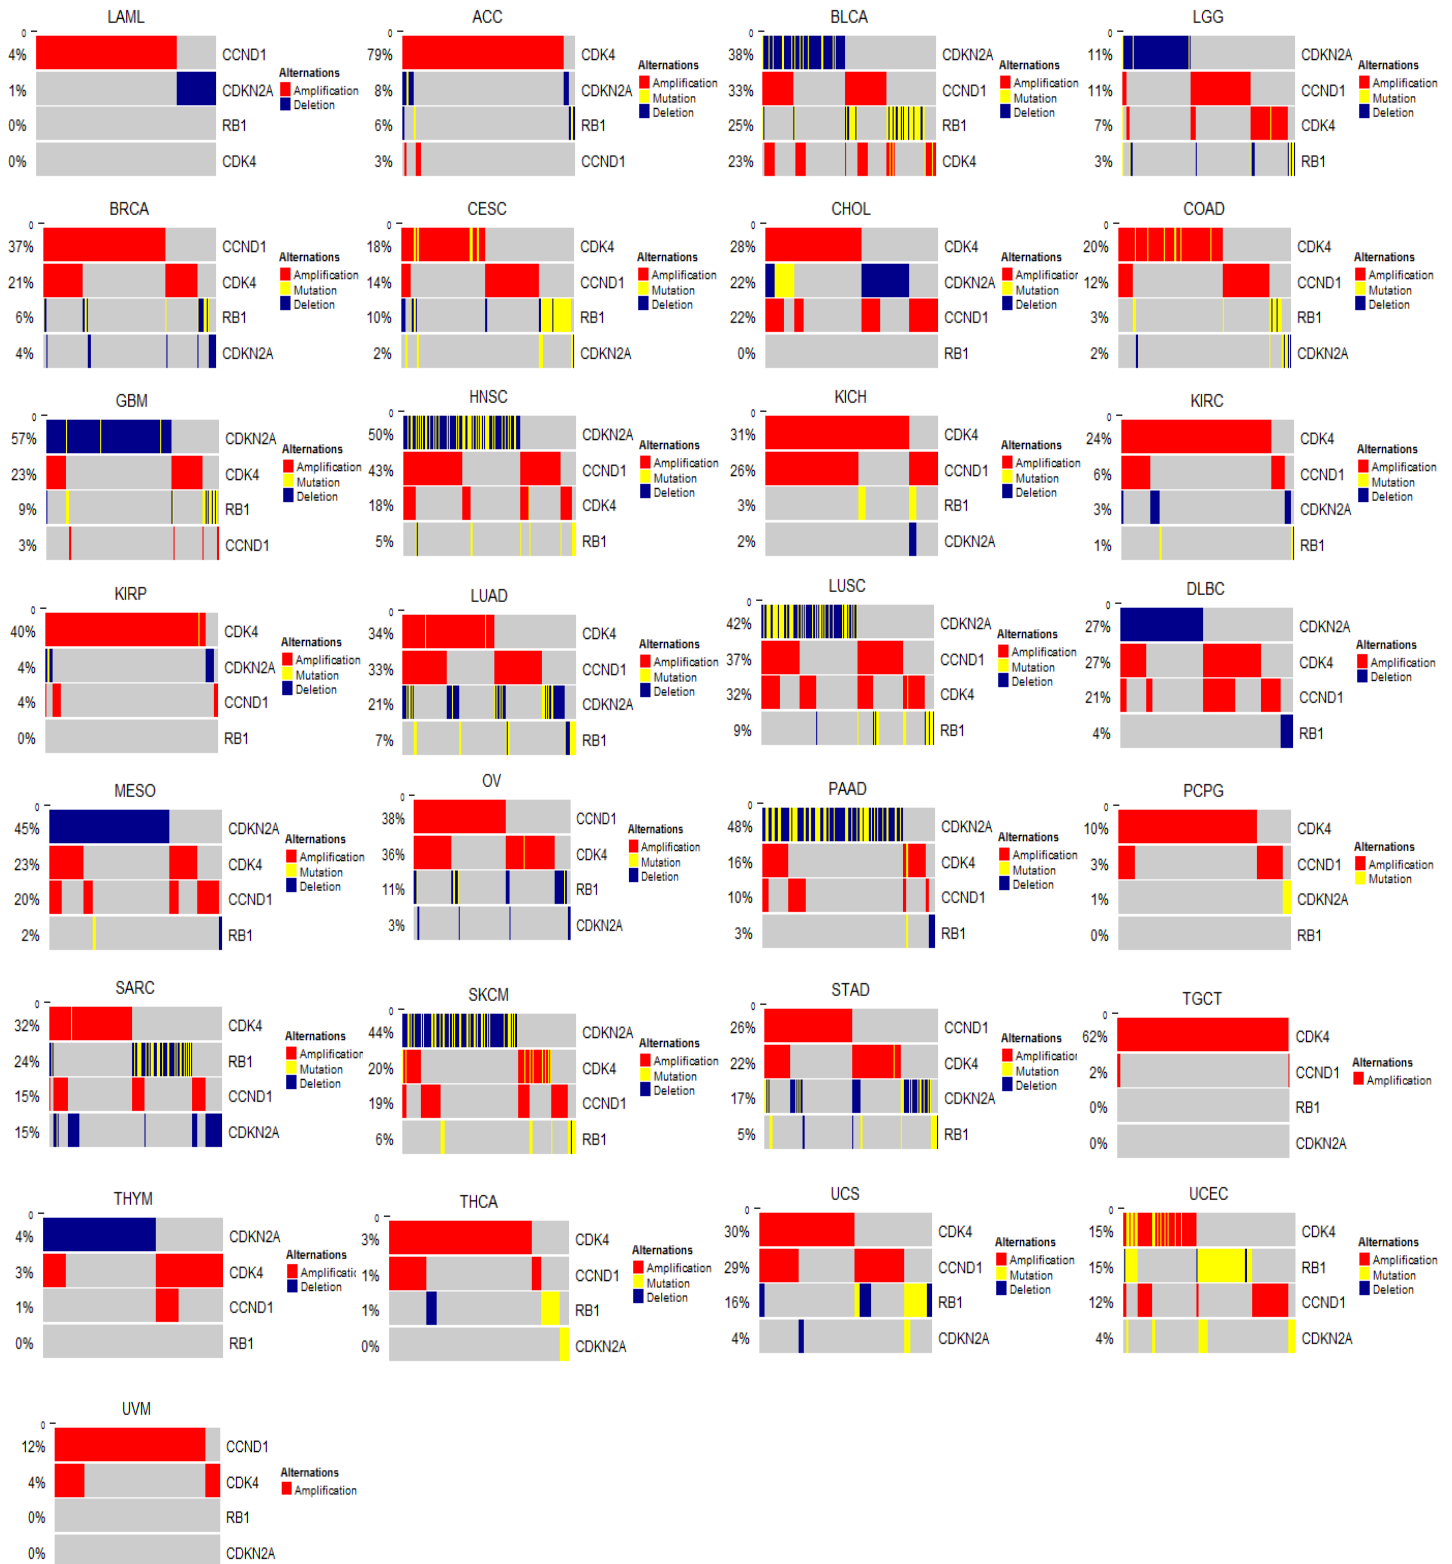

**Supplementary Figure 4:** Oncoprints of cancer types exhibiting mutation (yellow), homozygous deletion (blue) and amplification (red) of the indicated genes. Gene are organized by frequency of alteration indicating the disparate dominant mechanisms of RB-pathway deregulation across tumor types.

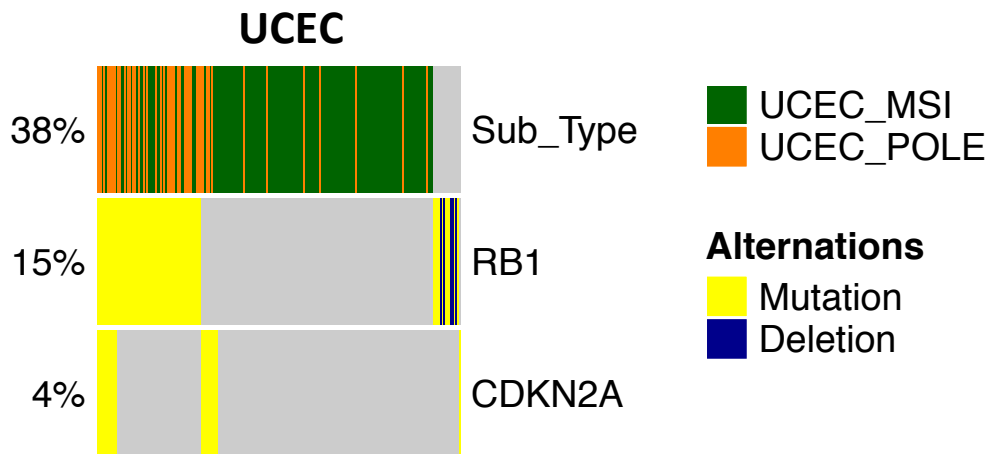

**Supplementary Figure 5:** Oncoprint shows the relationship of RB1 and CDKN2A genetic alterations vs. MSI or POLE mutation status in UCEC. The co-occurring alterations in RB1 and CDKN2A are largely associated with these mutator phenotypes. The percentages indicate the frequency of the observed genetic alterations in the cohort.

Figure S6

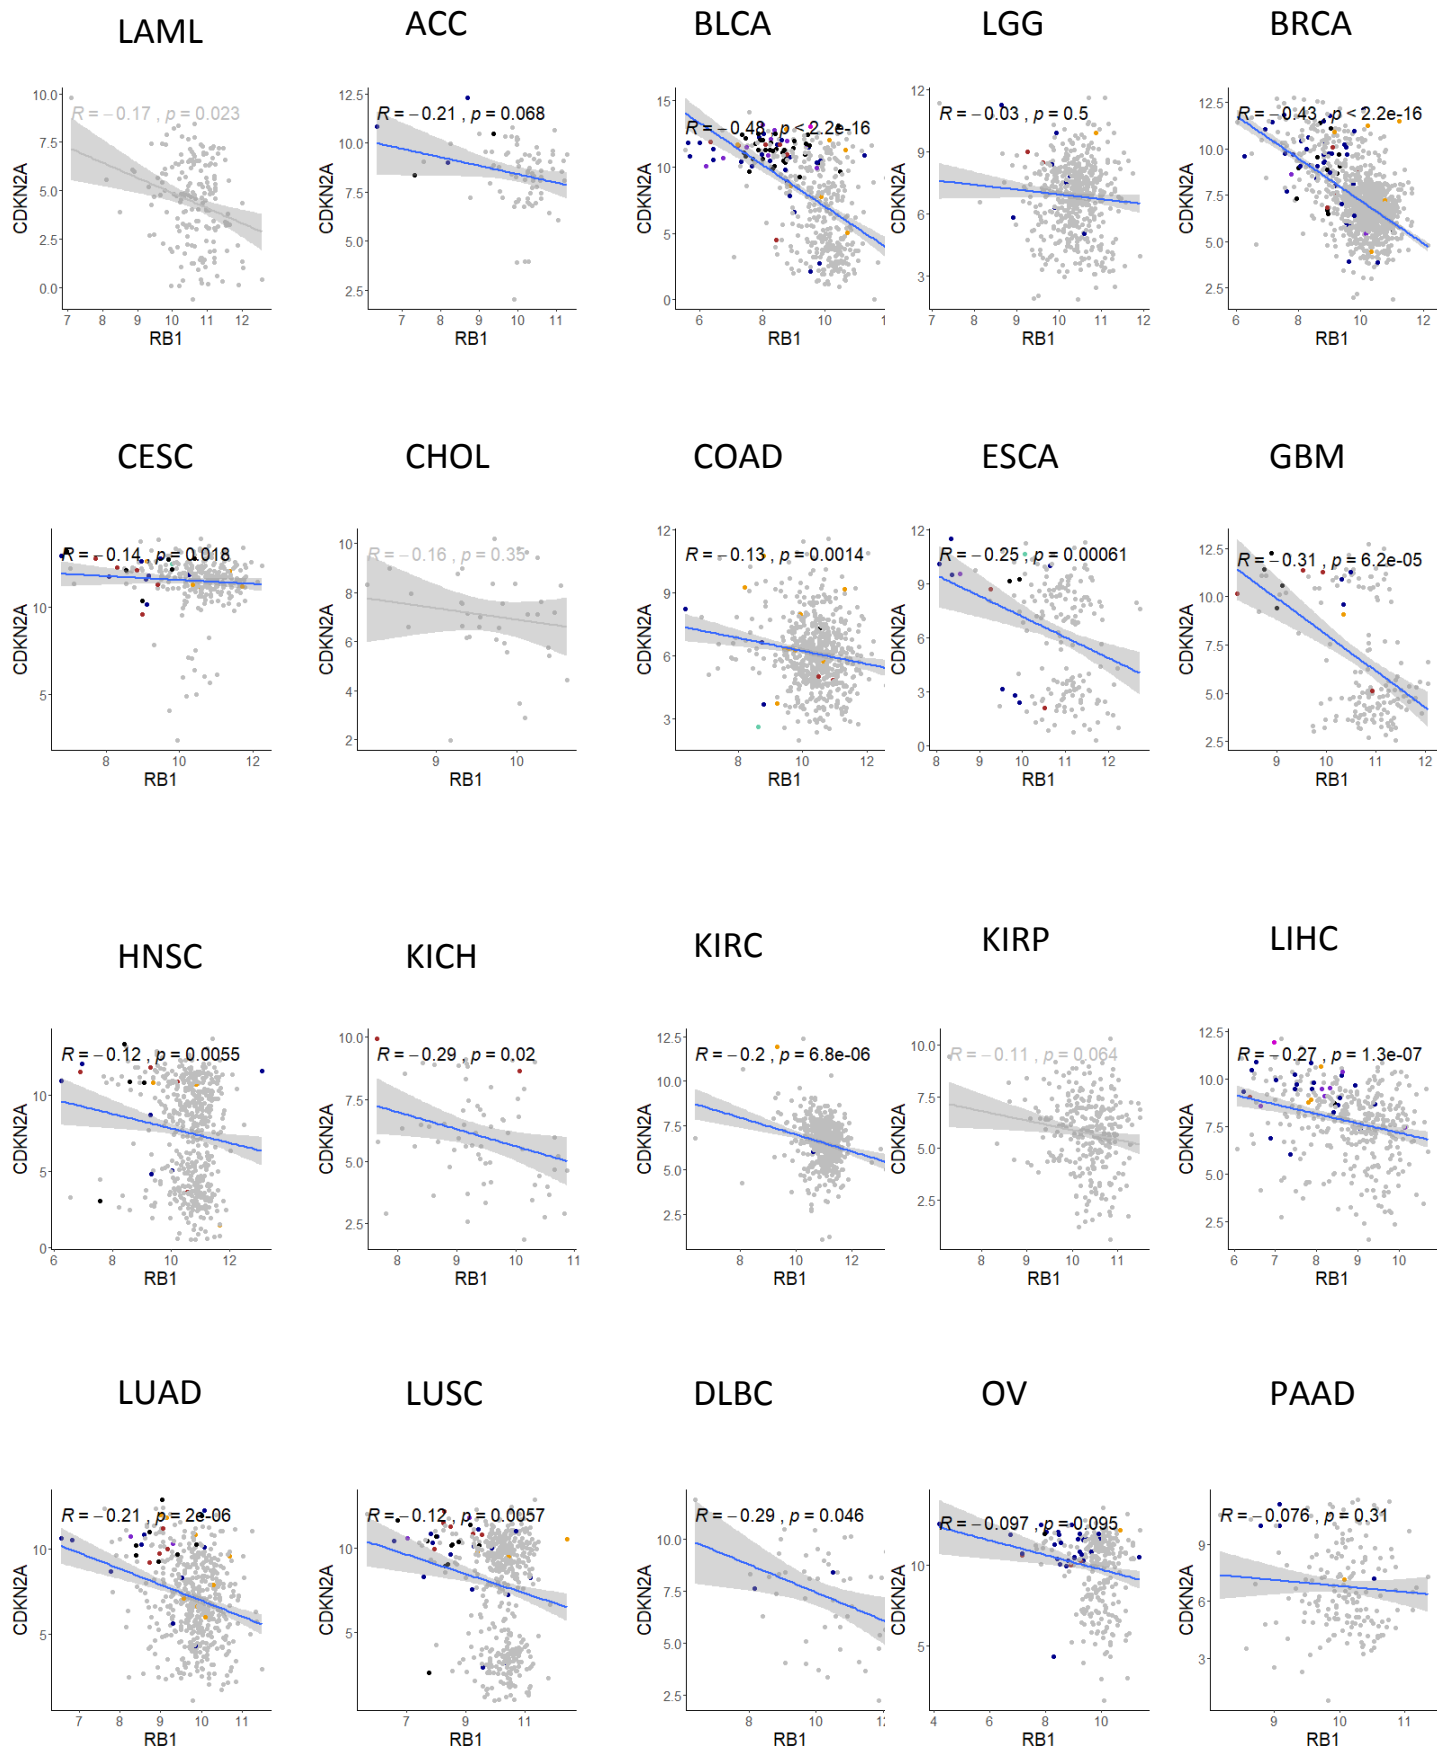

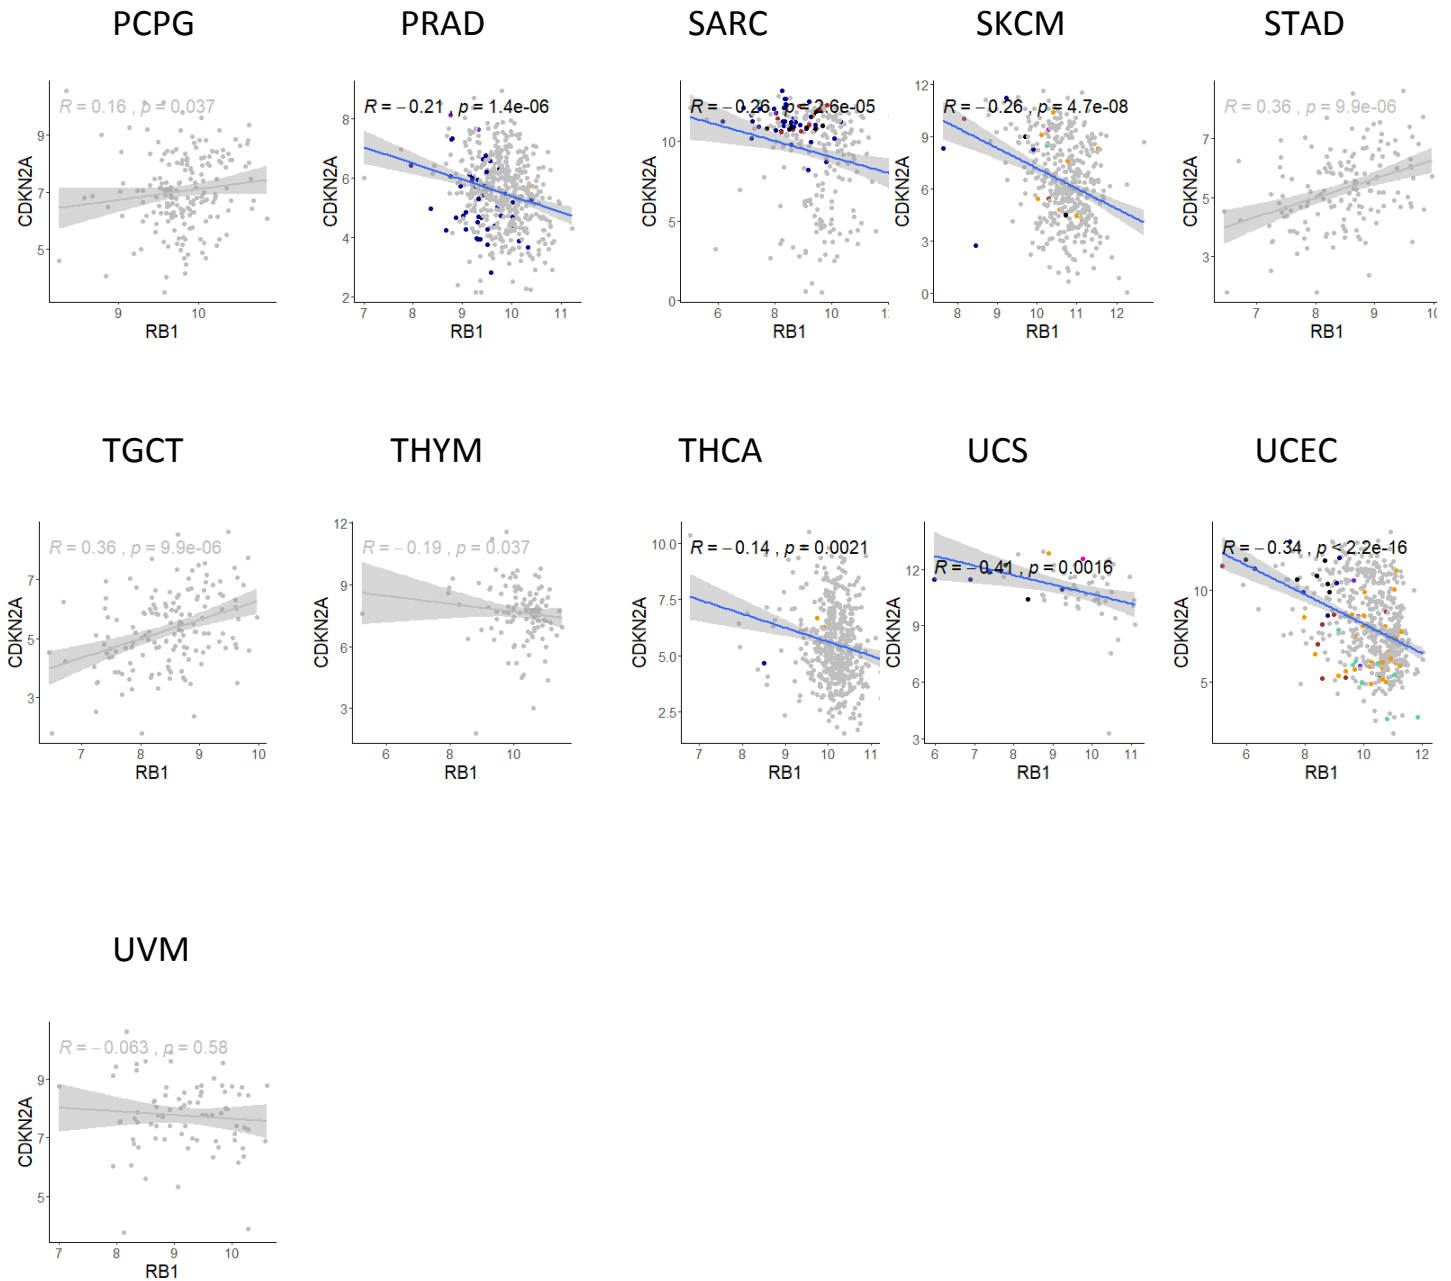

**Supplementary Figure 6:** Pearson correlation of the relationship between CDKN2A and RB1 gene expression across all tumors in the TCGA pan-cancer data sets (R-value and related p-value are shown). The presence of different mutations in RB1 are shown in the legend, the shading denotes the 95% confidence interval.

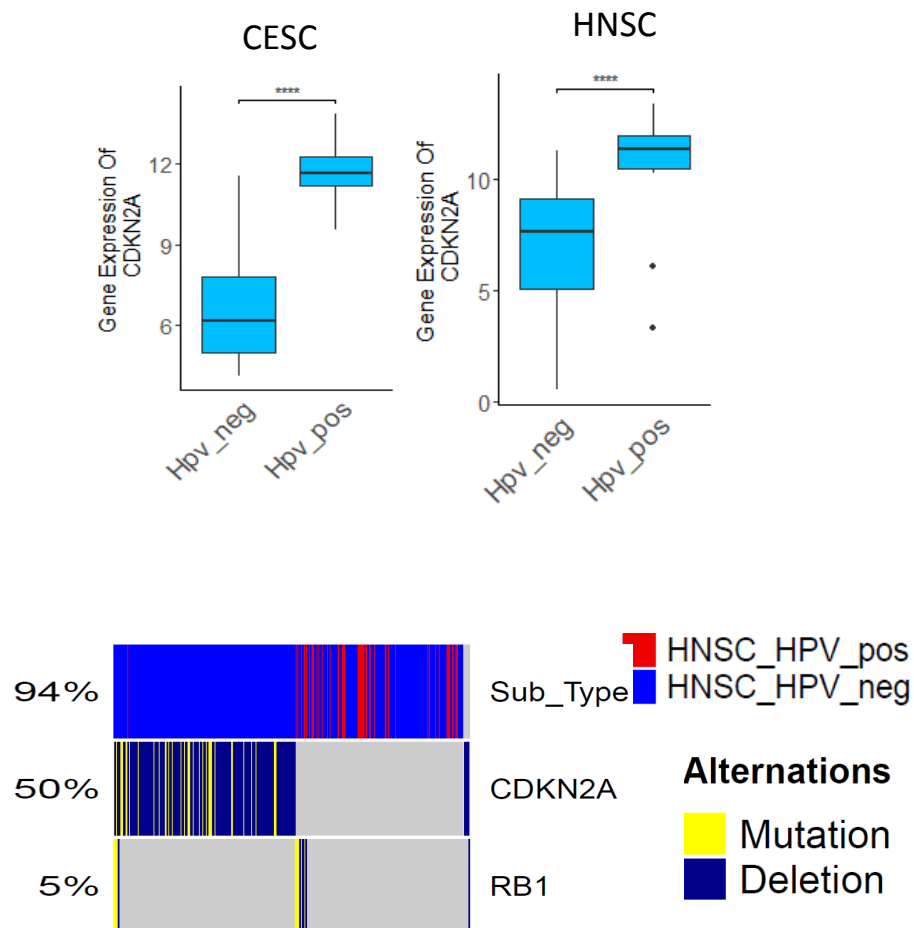

**Supplementary Figure 7:** Stratification of the expression of CDKN2A by the HPV-status in HNSC and CESC cases. For HNSC cases 72 are positive and 415 are negative for HPV. For CESC cases 169 are positive and 9 are negative for HPV. The percentages indicate the frequency of the observed genetic alterations in the cohort.



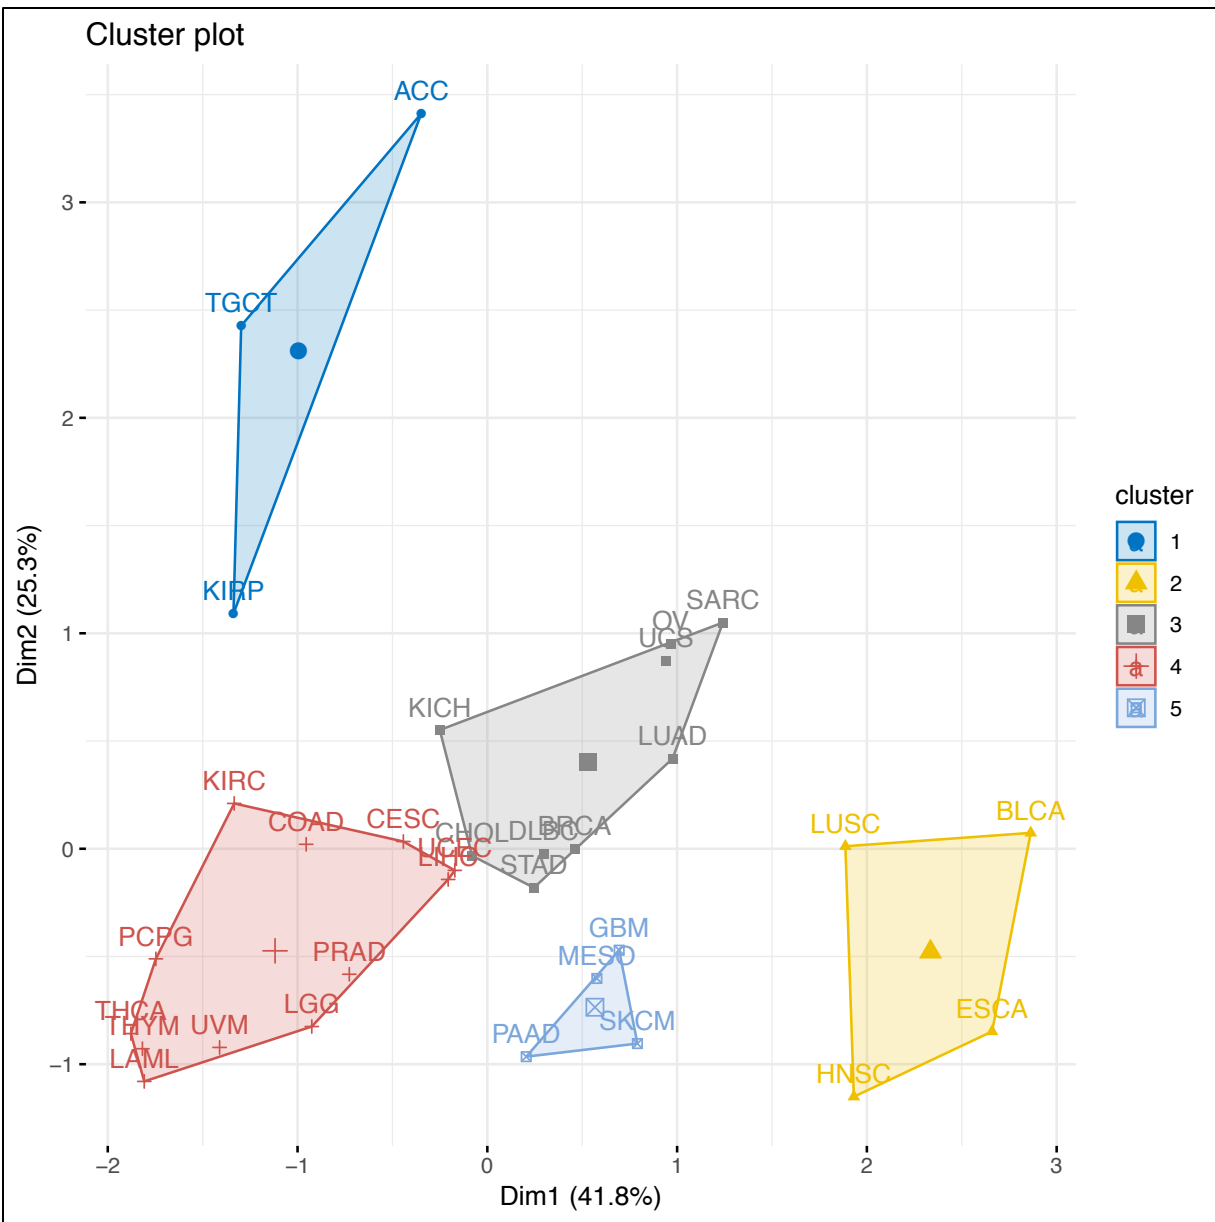

**Supplementary Figure 8:** Principle component analysis of all samples and each of the tumor types based on the frequency of CDKN2A, CDK4, CCND1, and RB1 genetic alterations. K-Means clustering yields five discrete clusters of tumor types.

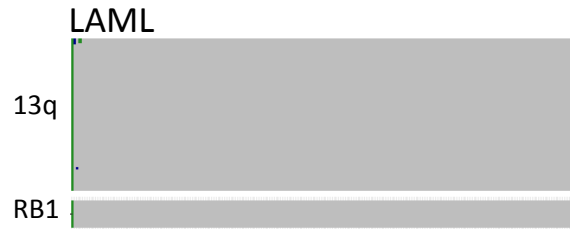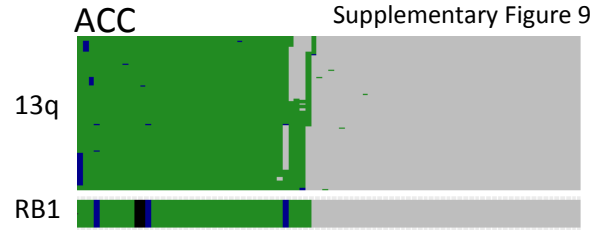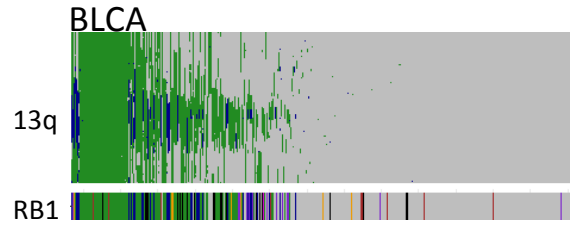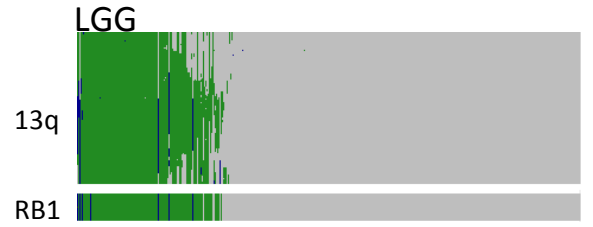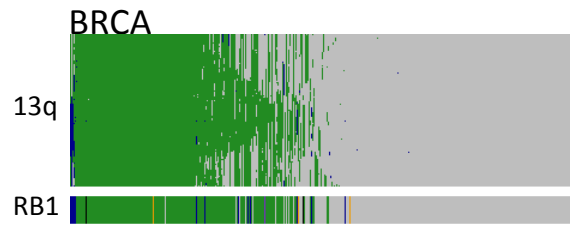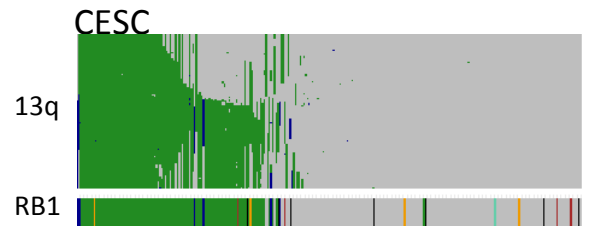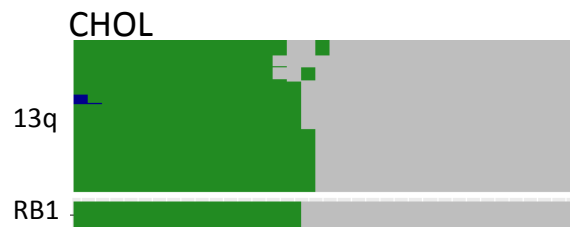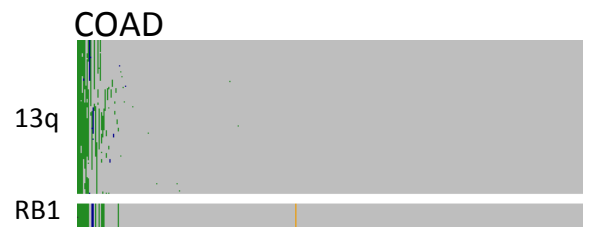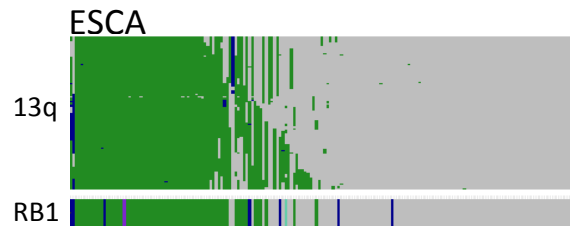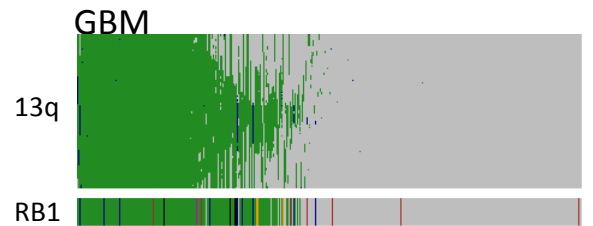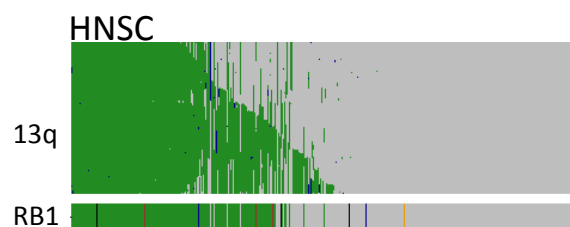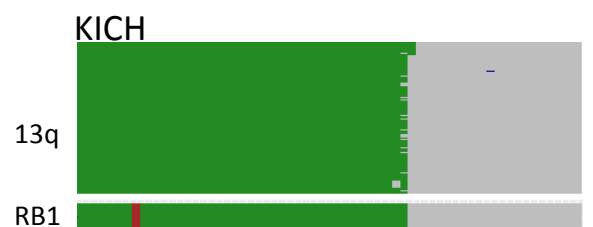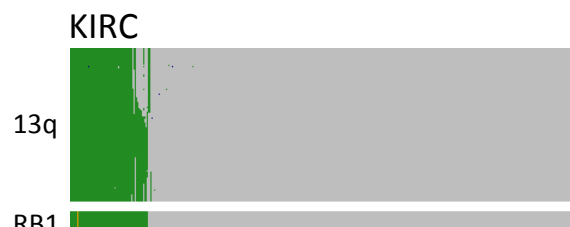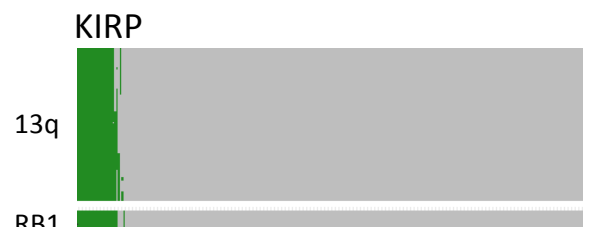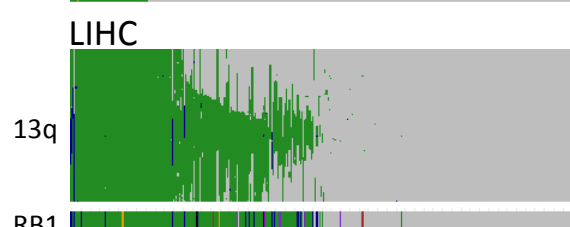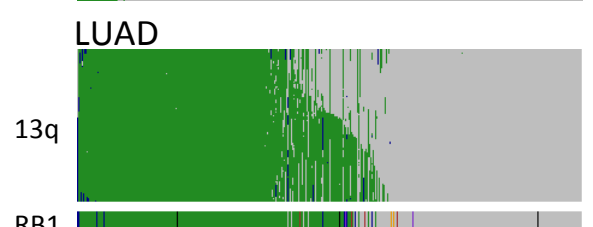

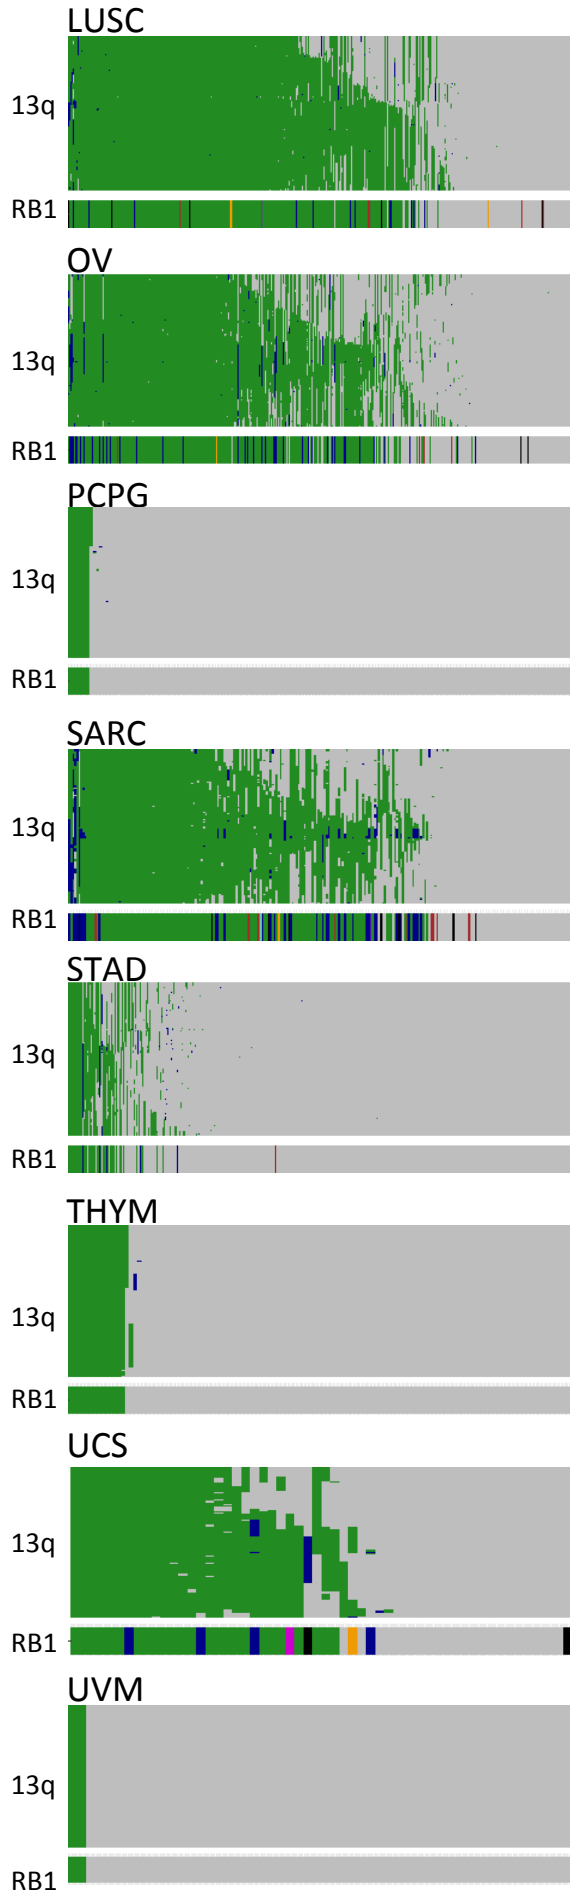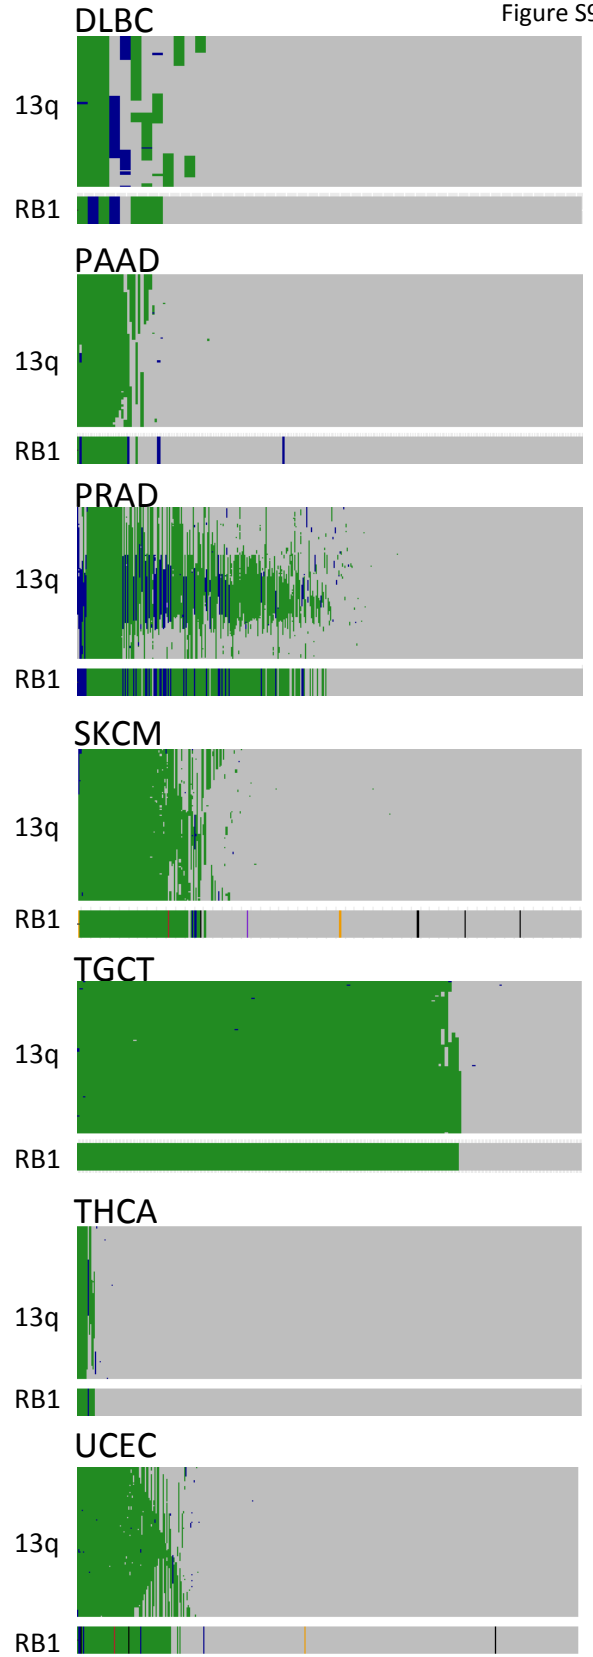

**Supplementary Figure 9:** Histograms summarize the copy number analysis of single copy loss (green) and deletion (blue) of genes in *cis* along chromosome arm 13q. A total of 1057 genes are illustrated. The behavior of RB1 is shown in the histogram below, all cases for all tumor types are shown. Legend denotes different forms of RB1 gene alterations beyond copy number changes

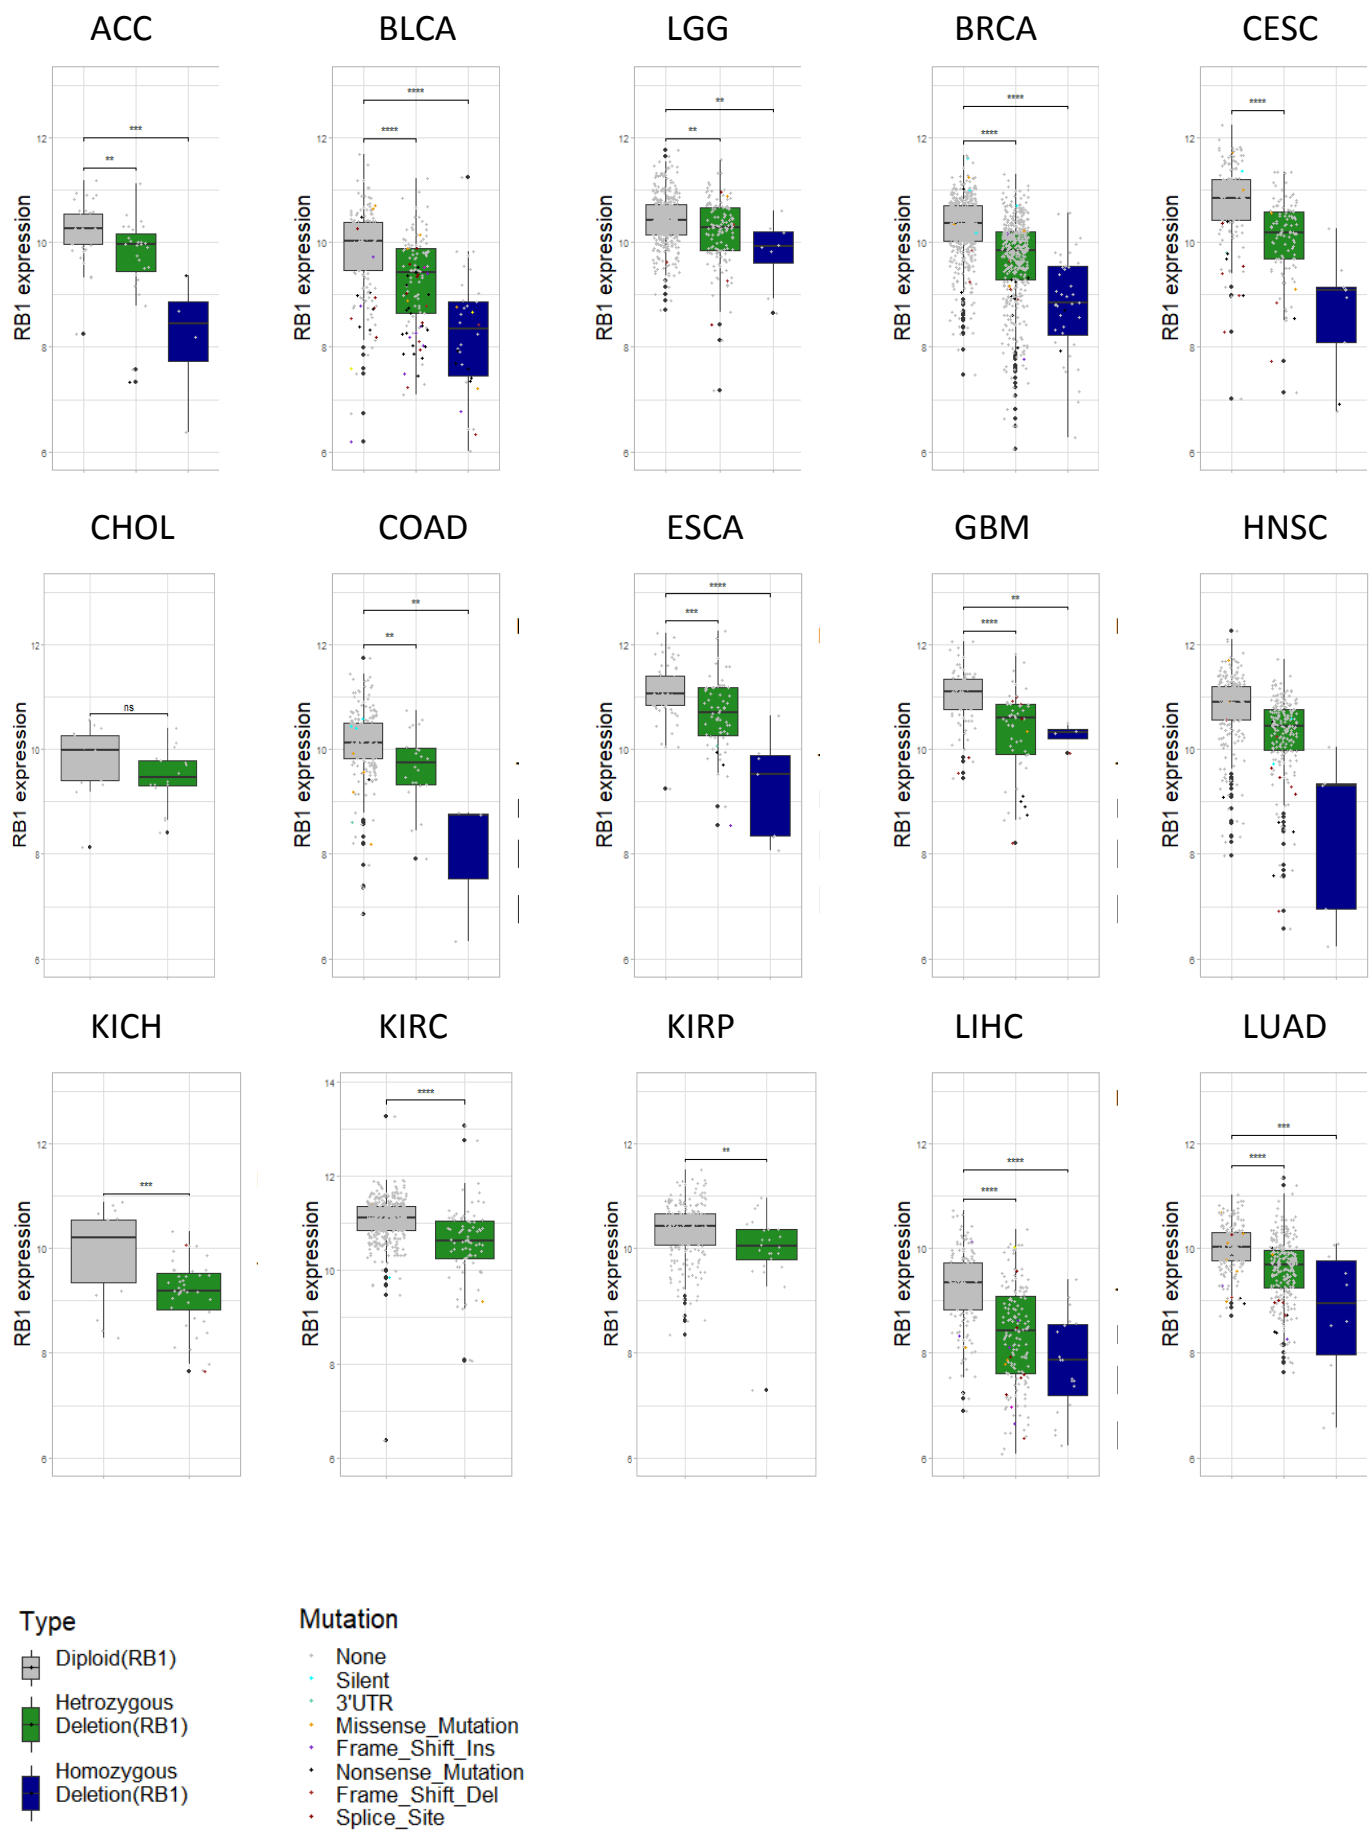

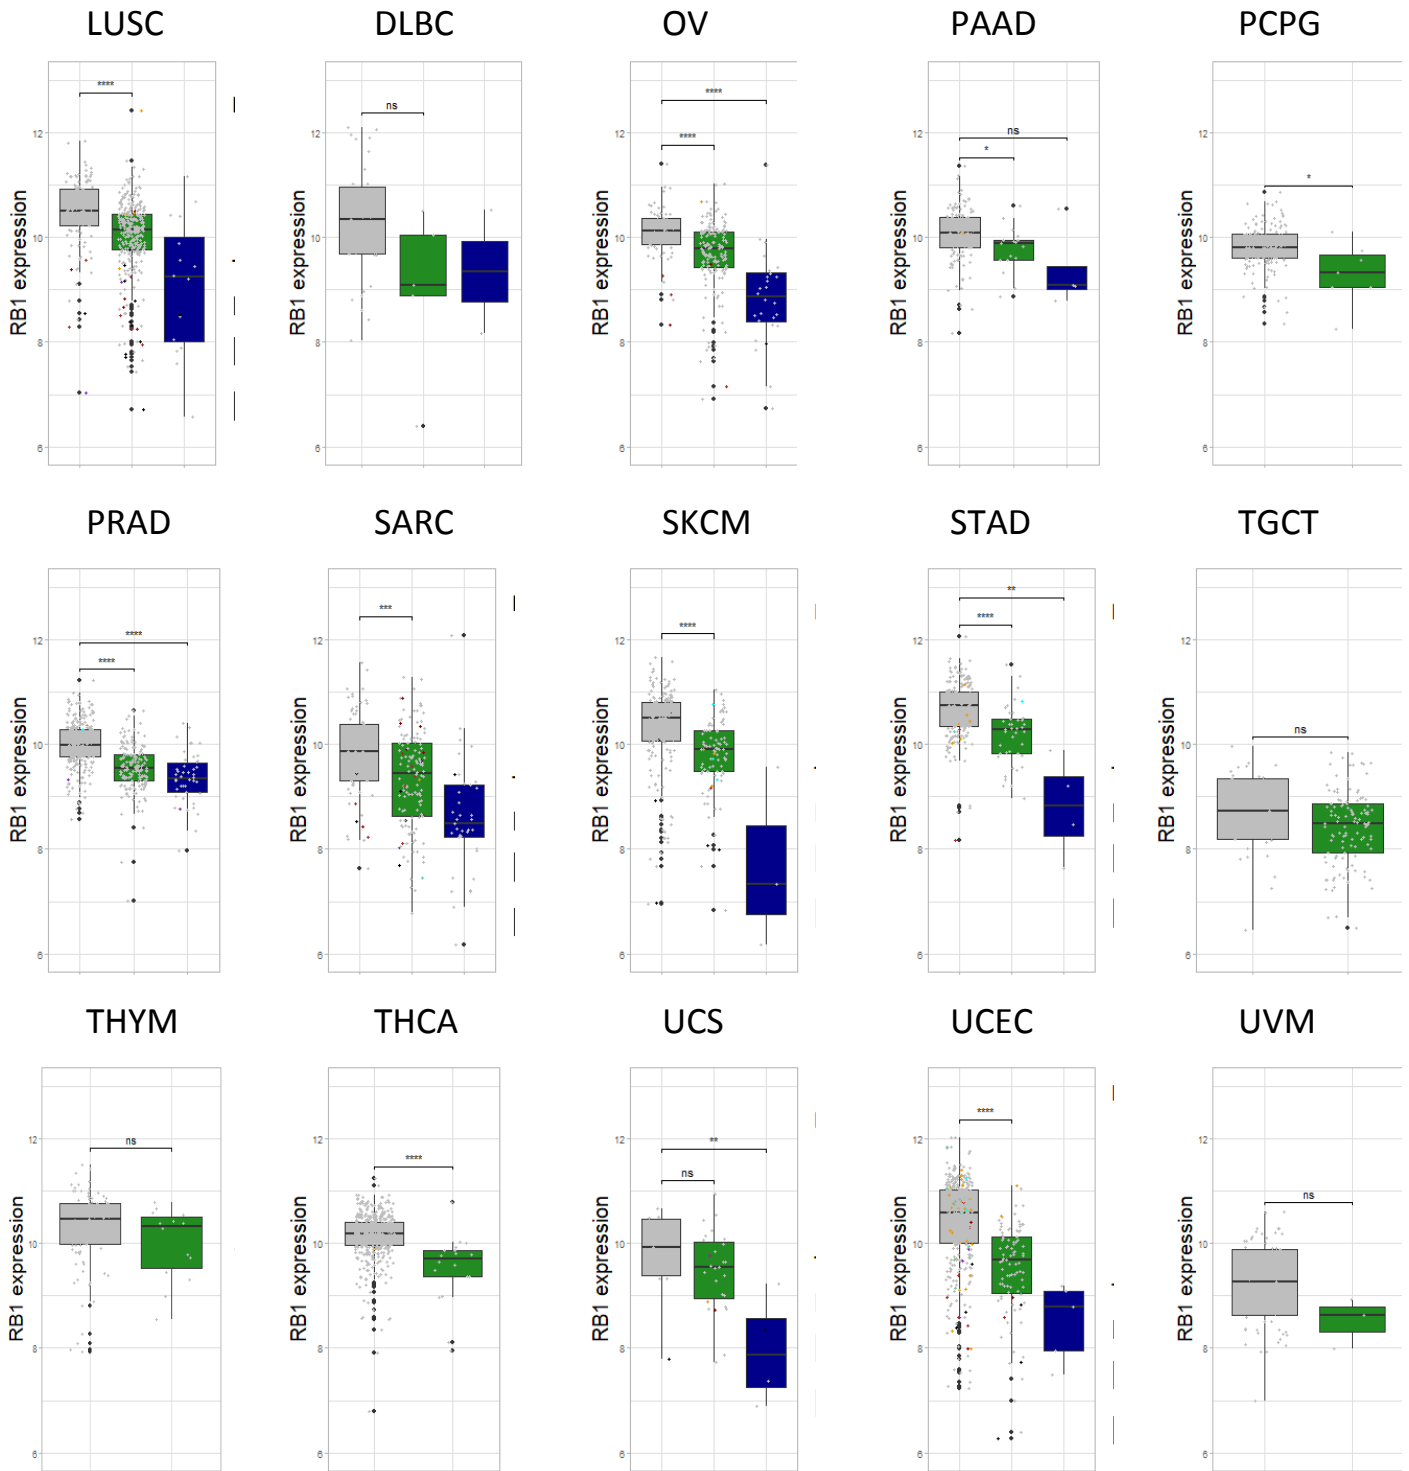

Type

-  Diploid(RB1)
-  Heterozygous Deletion(RB1)
-  Homozygous Deletion(RB1)

Mutation

-  None
-  Silent
-  3'UTR
-  Missense\_Mutation
-  Frame\_Shift\_Ins
-  Nonsense\_Mutation
-  Frame\_Shift\_Del
-  Splice\_Site

**Supplementary Figure 10: Analysis of RB1 expression in tumors exhibiting diploid, heterozygous loss, or deletion of the RB1 locus (\*p<0.05, \*\*p<0.01, \*\*\*p<0.001, \*\*\*\*p<0.0001). Legend denotes different forms of RB1 gene alterations beyond copy number changes**

ACC

Disease Free Survival

Overall Survival

Survival Plot  
p-value= 0.579111

Survival Plot  
p-value= 0.399853

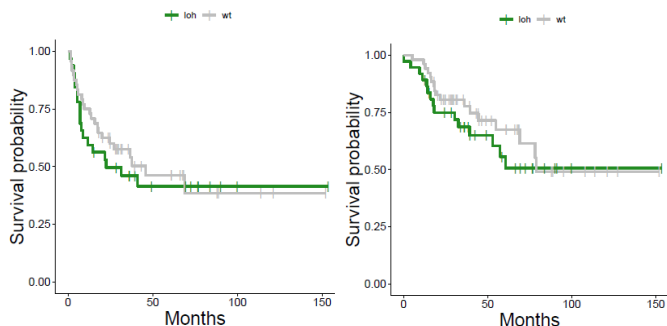

BLCA

Disease Free Survival

Overall Survival

Survival Plot  
p-value= 0.496842

Survival Plot  
p-value= 0.371266

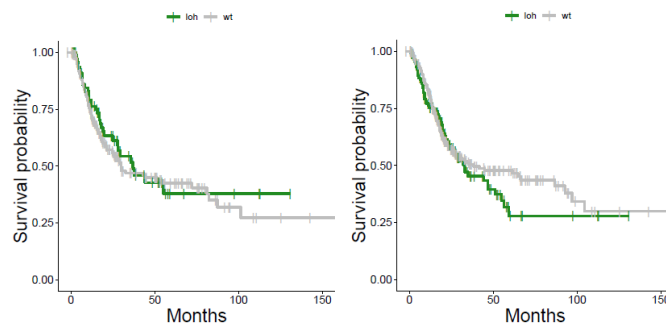

LGG

Disease Free Survival

Overall Survival

Survival Plot  
p-value= 0.061175

Survival Plot  
p-value= 0.009017

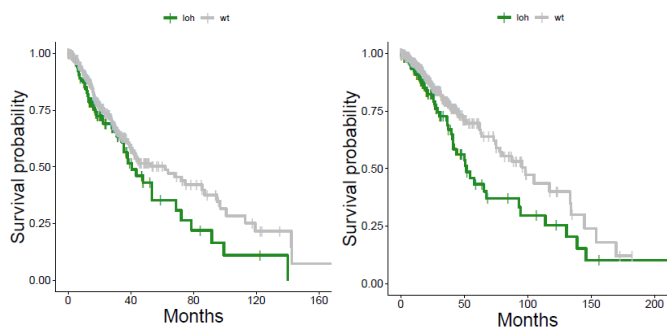

BRCA

Disease Free Survival

Overall Survival

Survival Plot  
p-value= 0.846759

Survival Plot  
p-value= 0.283184

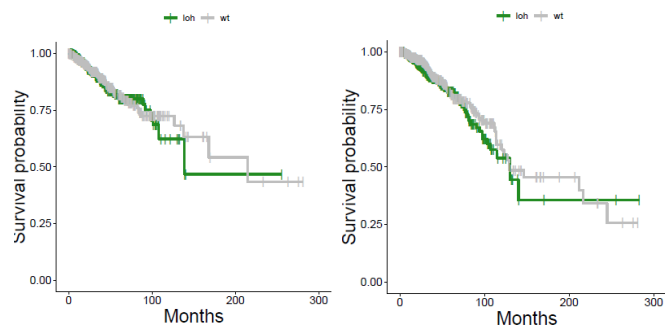

CESC

Disease Free Survival

Overall Survival

Survival Plot  
p-value= 0.081805

Survival Plot  
p-value= 0.496013

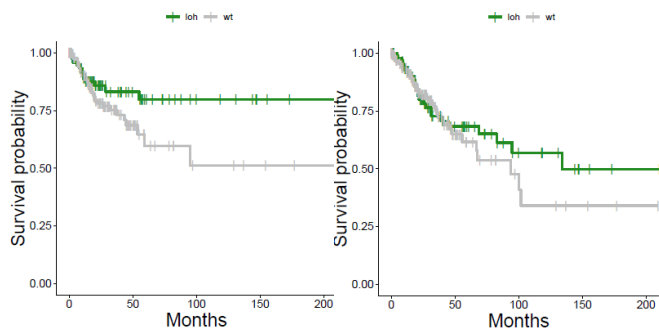

CHOL

Disease Free Survival

Overall Survival

Survival Plot  
p-value= 0.709419

Survival Plot  
p-value= 0.170904

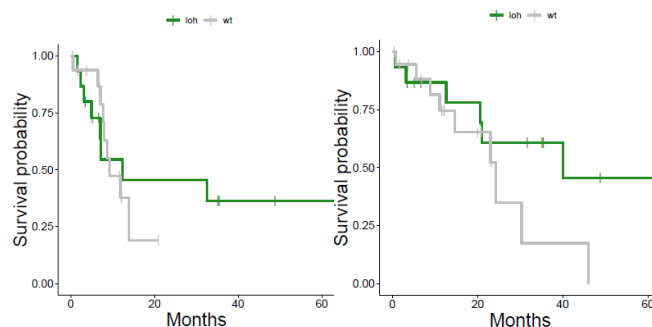

COAD

Disease Free Survival

Overall Survival

Survival Plot  
p-value= 0.301794

Survival Plot  
p-value= 0.848252

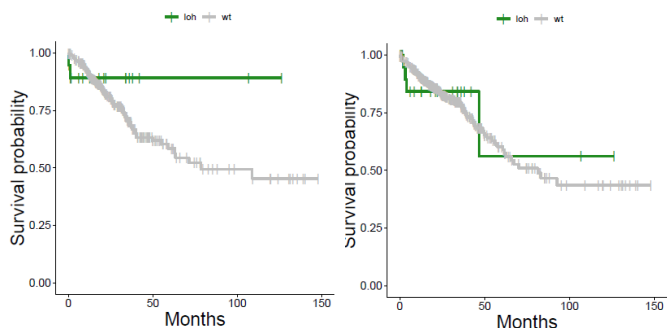

ESCA

Disease Free Survival

Overall Survival

Survival Plot  
p-value= 0.054475

Survival Plot  
p-value= 0.145044

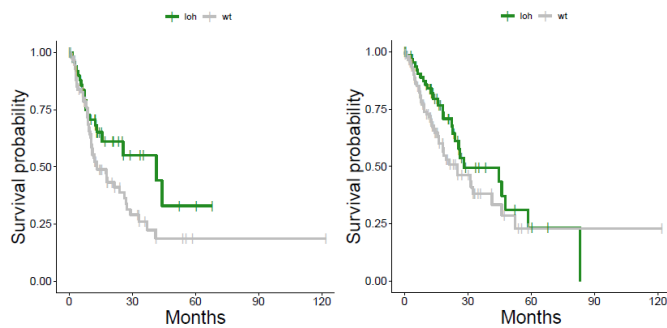

GBM

Disease Free Survival

Overall Survival

Survival Plot  
p-value= 0.613339

Survival Plot  
p-value= 0.712374

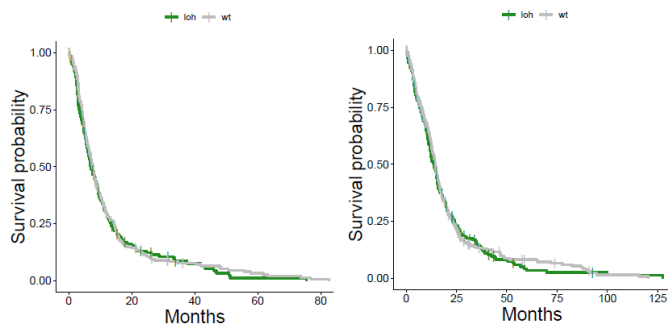

HNSC

Disease Free Survival

Overall Survival

Survival Plot  
p-value= 0.600647

Survival Plot  
p-value= 0.340432

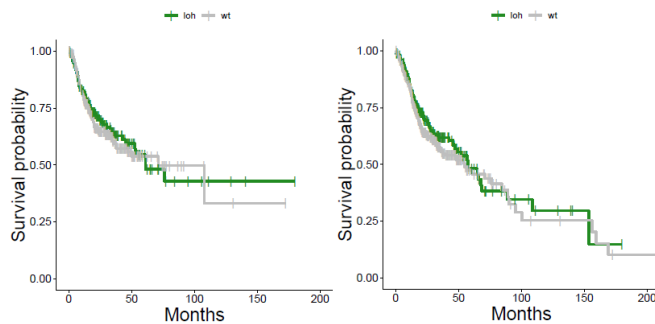

KICH

Disease Free Survival

Overall Survival

Survival Plot  
p-value= 0.234245

Survival Plot  
p-value= 0.606843

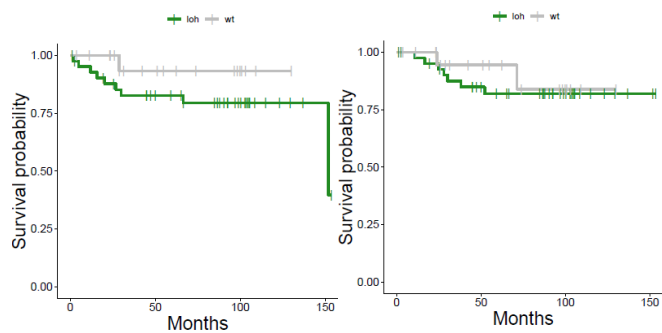

KIRC

Disease Free Survival

Overall Survival

Survival Plot  
p-value= 0.078711

Survival Plot  
p-value= 0.000617

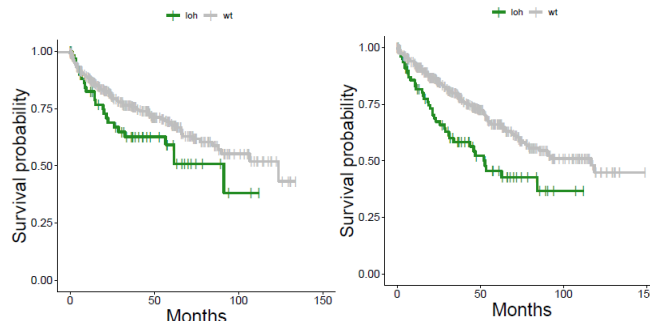



**KIRP**

Disease Free Survival

Survival Plot  
p-value= 0.000104

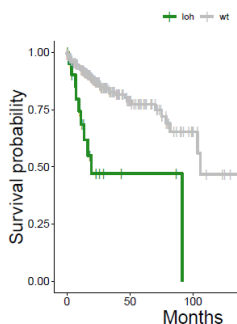

Overall Survival

Survival Plot  
p-value= 1e-04

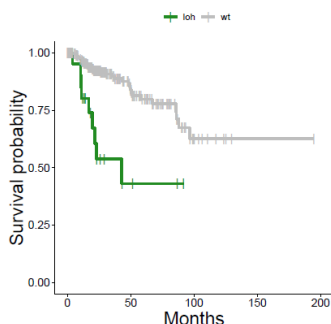

**LIHC**

Disease Free Survival

Survival Plot  
p-value= 0.155268

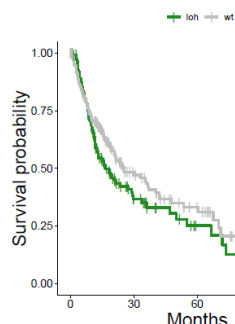

Overall Survival

Survival Plot  
p-value= 0.075116

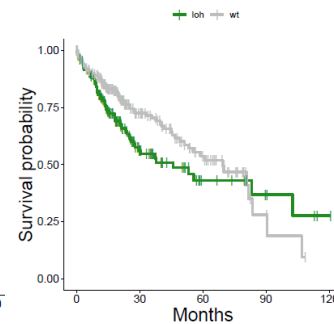

**LUAD**

Disease Free Survival

Survival Plot  
p-value= 0.443034

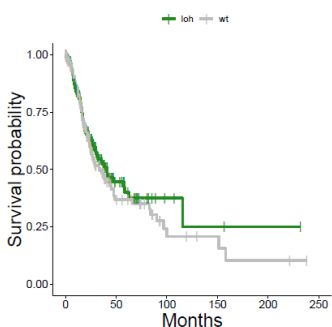

Overall Survival

Survival Plot  
p-value= 0.599392

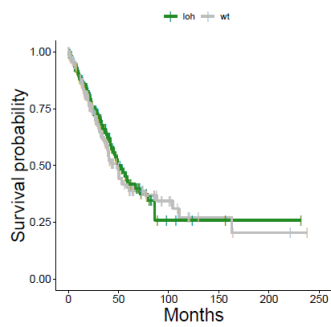

**LUSC**

Disease Free Survival

Survival Plot  
p-value= 0.548753

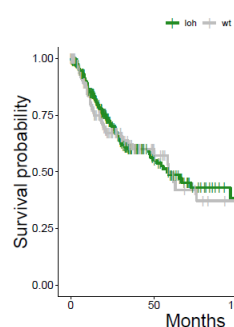

Overall Survival

Survival Plot  
p-value= 0.749411

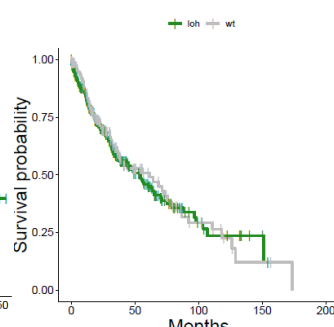

**OV**

Disease Free Survival

Survival Plot  
p-value= 0.296545

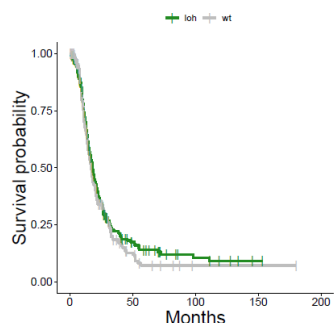

Overall Survival

Survival Plot  
p-value= 0.061945

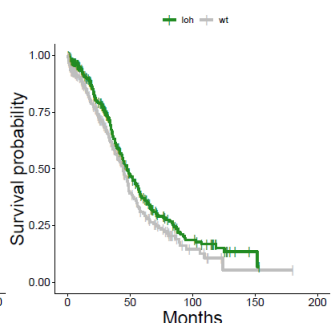

**PAAD**

Disease Free Survival

Survival Plot  
p-value= 0.30433

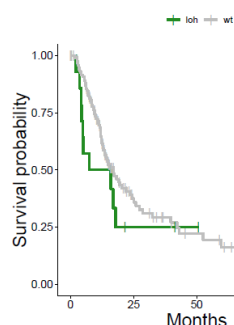

Overall Survival

Survival Plot  
p-value= 0.383368

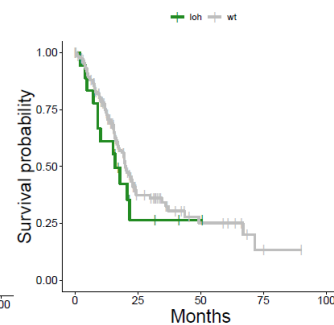

PRAD

Disease Free Survival

Survival Plot  
p-value= 0.000448

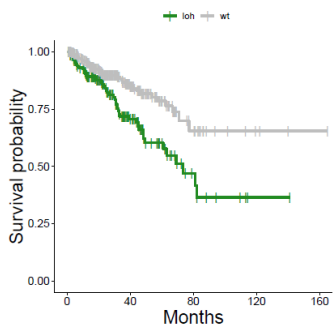

Overall Survival

Survival Plot  
p-value= 0.708273

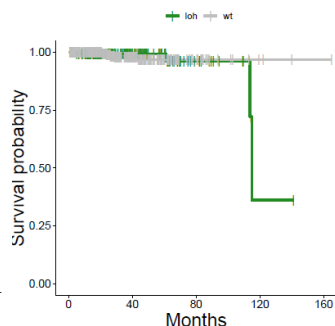

SARC

Disease Free Survival

Survival Plot  
p-value= 0.418397

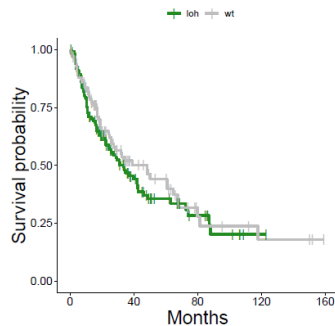

Overall Survival

Survival Plot  
p-value= 0.77334

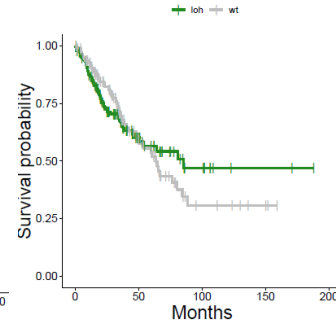

SKCM

Disease Free Survival

Survival Plot  
p-value= 0.70132

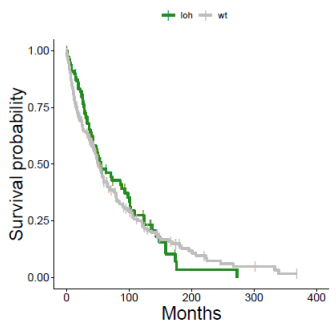

Overall Survival

Survival Plot  
p-value= 0.305379

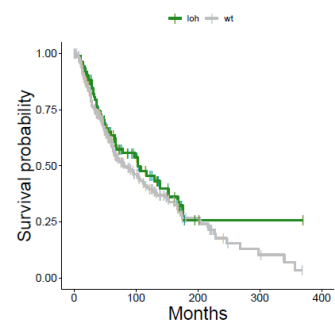

STAD

Disease Free Survival

Survival Plot  
p-value= 0.284911

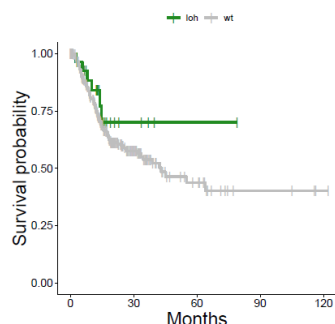

Overall Survival

Survival Plot  
p-value= 0.110686

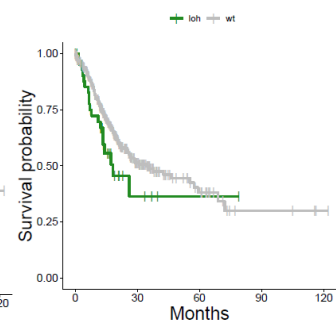

TGCT

Disease Free Survival

Survival Plot  
p-value= 0.475952

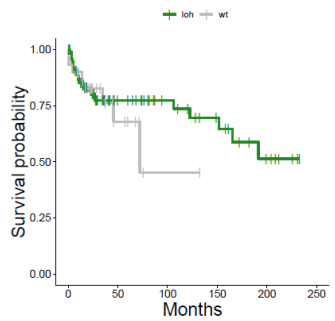

Overall Survival

Survival Plot  
p-value= 0.999098

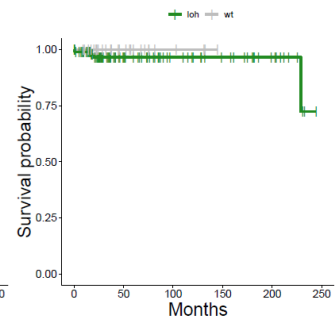

THYM

Disease Free Survival

Survival Plot  
p-value= 0.160274

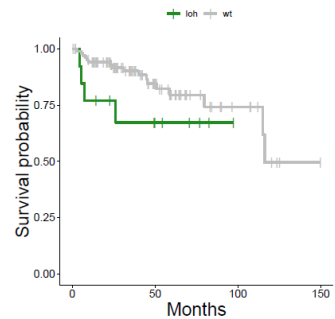

Overall Survival

Survival Plot  
p-value= 0.998357

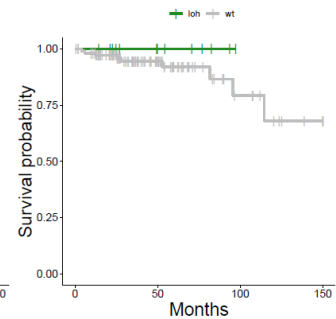

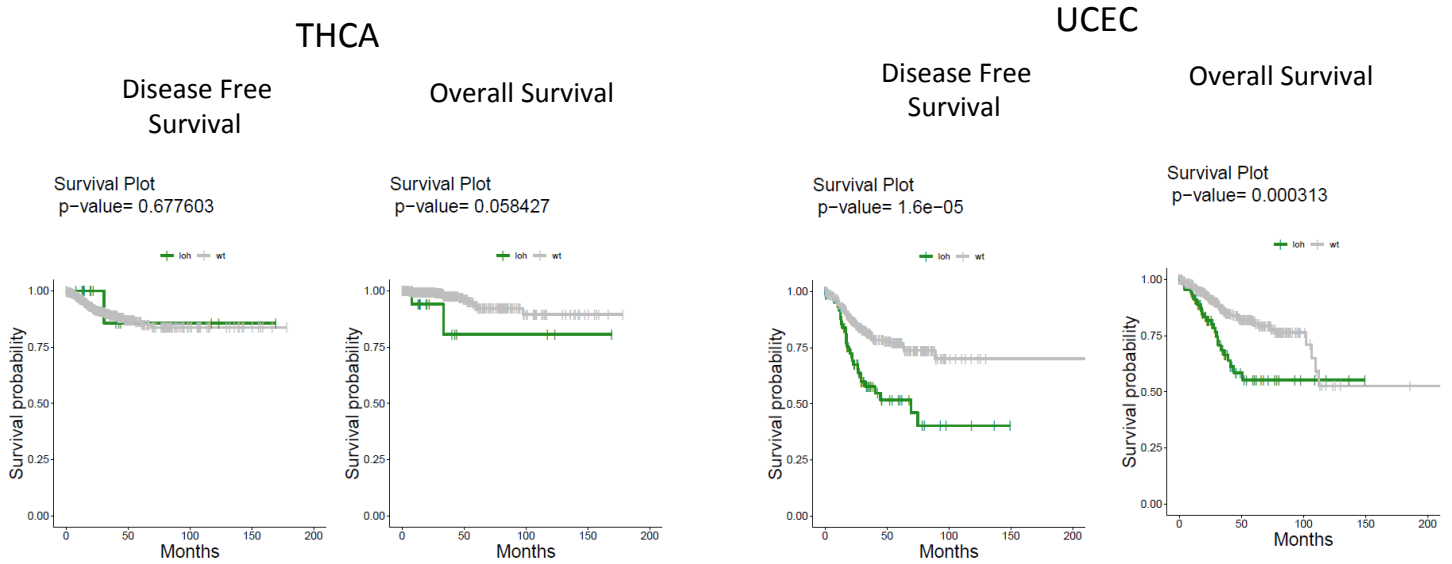

**Supplementary Figure 11:** Kaplan-Meier analysis of pan-cancer tumor types stratified by diploid vs. heterozygous loss of RB1 locus. Statistical significance was determined by log-rank test. Both the disease-free survival and overall survival results are shown for all cases for which the data is available. NA indicates the survival data is not available for that tumor type.

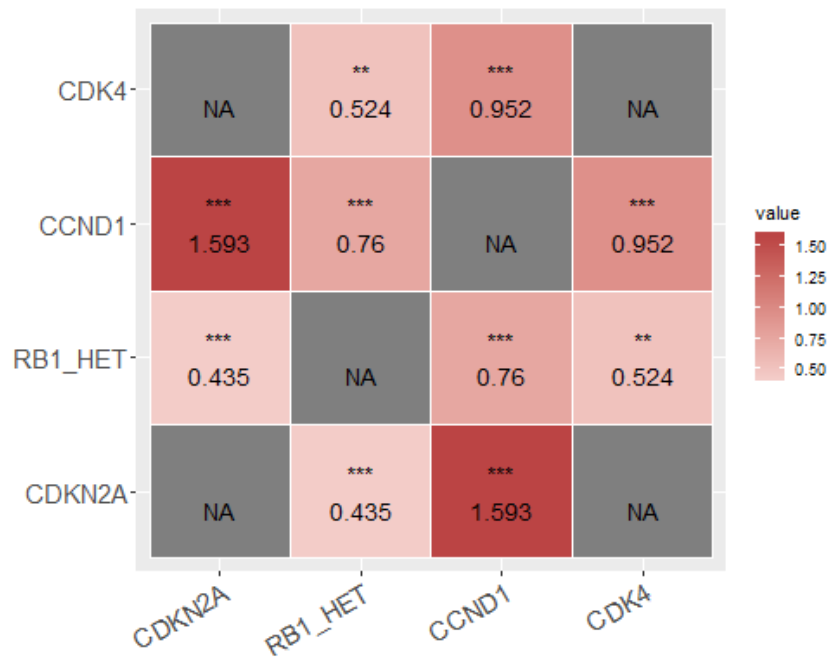

**Supplementary Figure 12:** Matrix plot shows the Odds-ratio for co-occurrence between RB1 heterozygosity and other RB-pathway alterations across all tumor types in the TCGA pan-cancer. Statistical significance is shown (\*\* $p < 0.01$ , \*\*\* $p < 0.001$ ).

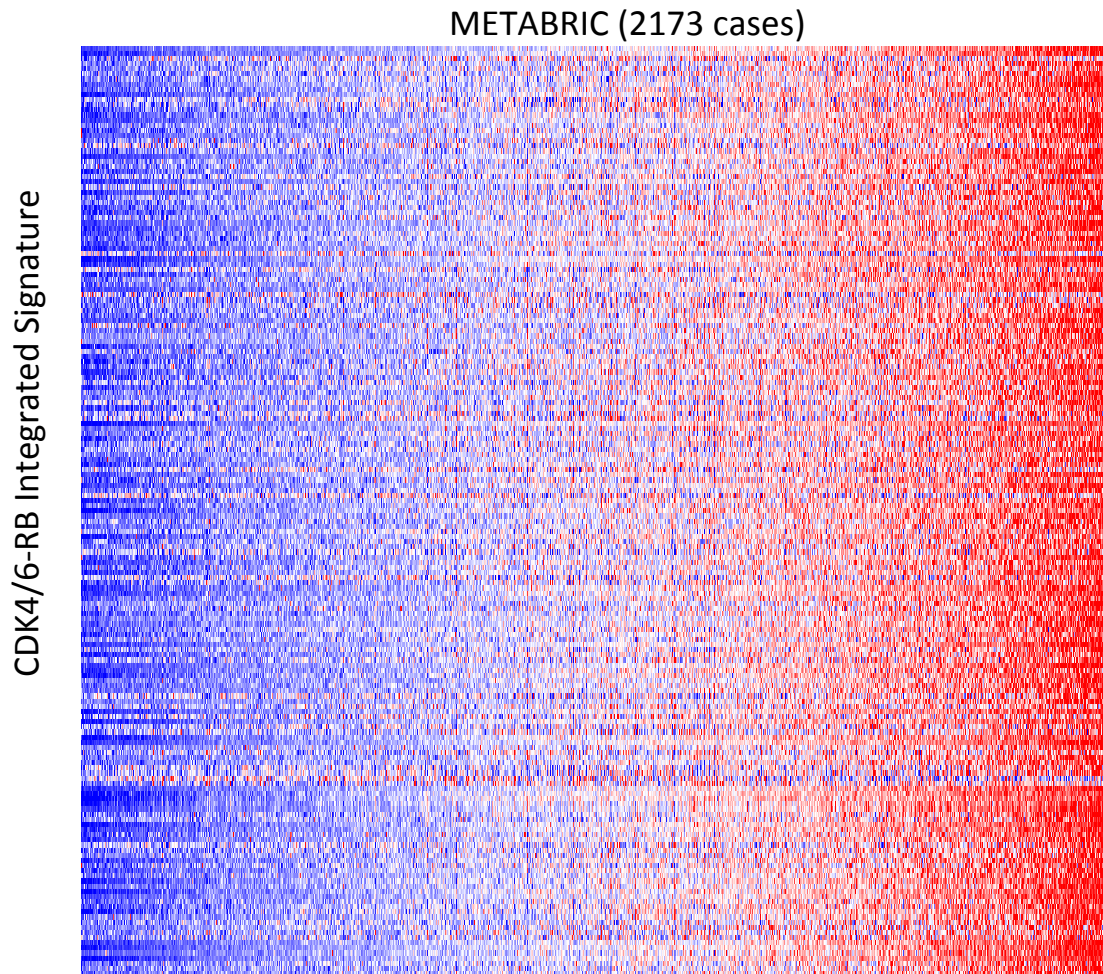

**Supplementary Figure 13:** Heatmap shows the expression of the 182 genes of CDK4/6-RB integrated signature clustered by average signature value. The clinical cases are from the METABRIC data set of 2173 breast cancer samples.

### LAML

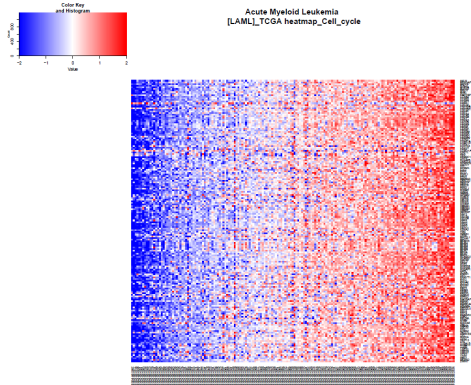

### ACC

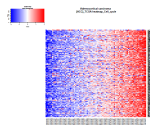

### BLCA

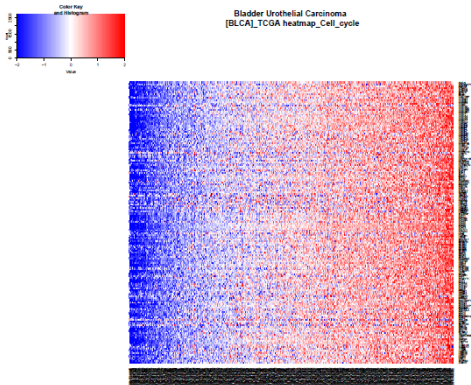

### LGG

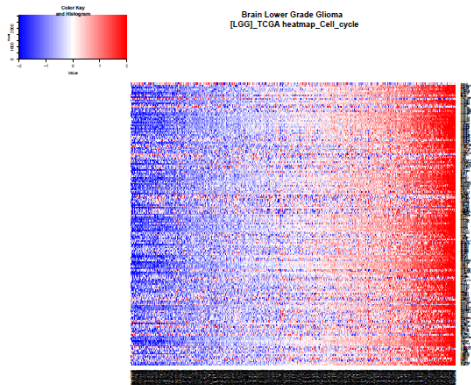

## Disease Free Survival

NA

Survival Plot  
 Low Vs Medium p-value= 0.01797  
 High Vs Medium p-value= 0.0001;  
 High Vs Low p-value= 1e-05

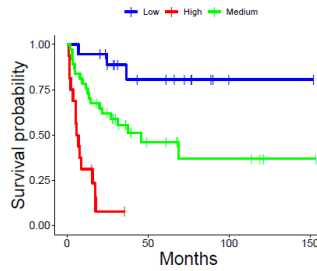

Survival Plot  
 Low Vs Medium p-value= 0.82857  
 High Vs Medium p-value= 0.2656;  
 High Vs Low p-value= 0.47129

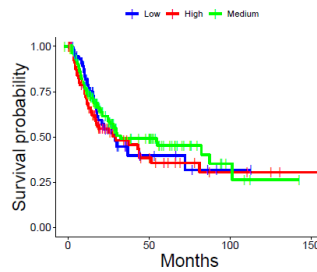

Survival Plot  
 Low Vs Medium p-value= 0.15704  
 High Vs Medium p-value= 0.0005;  
 High Vs Low p-value= 2.7e-05

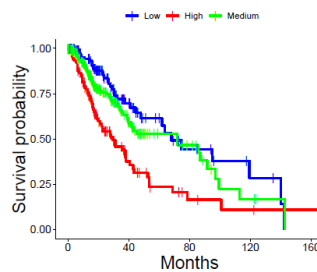

## Overall Survival

Survival Plot  
 Low Vs Medium p-value= 0.08670  
 High Vs Medium p-value= 0.0664;  
 High Vs Low p-value= 0.937461

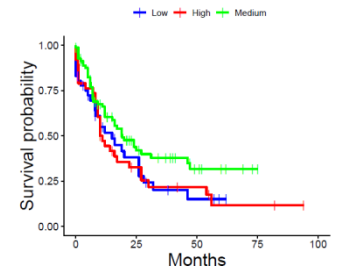

Survival Plot  
 Low Vs Medium p-value= 0.29420  
 High Vs Medium p-value= 1e-06  
 High Vs Low p-value= 1e-05

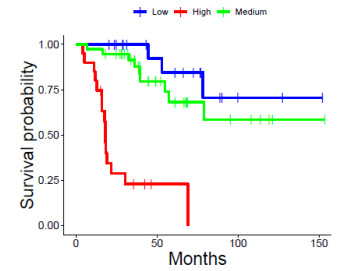

Survival Plot  
 Low Vs Medium p-value= 0.92530  
 High Vs Medium p-value= 0.8962;  
 High Vs Low p-value= 0.977069

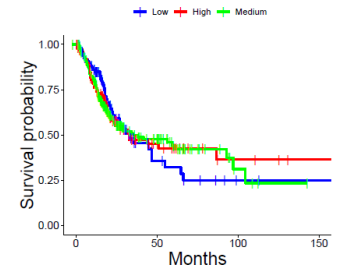

Survival Plot  
 Low Vs Medium p-value= 0.04765  
 High Vs Medium p-value= 7e-06  
 High Vs Low p-value= 0

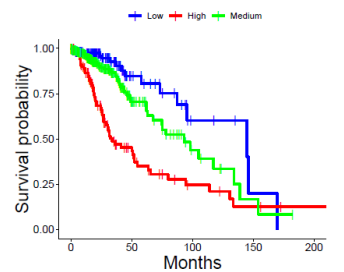

### BRCA

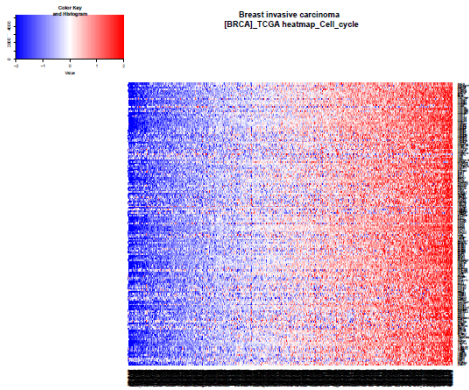

### CESC

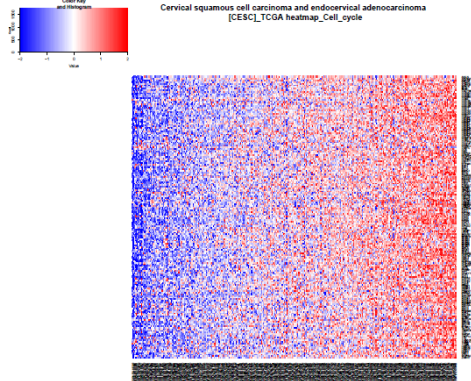

### CHOL

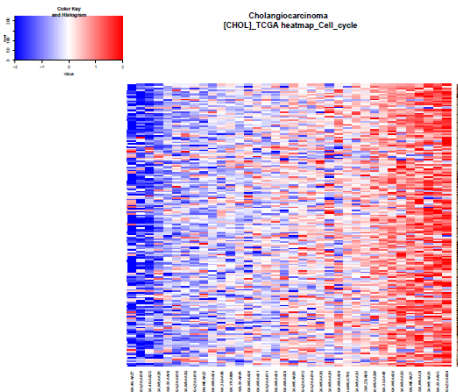

### COAD

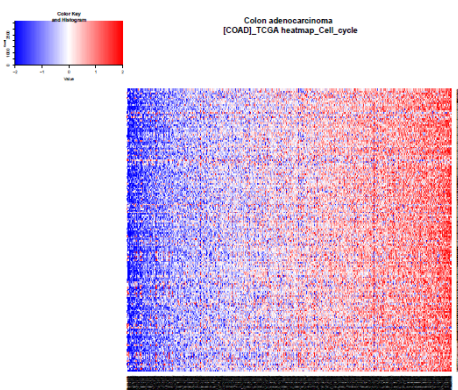

## Disease Free Survival

Survival Plot  
 Low Vs Medium p-value= 0.40249  
 High Vs Medium p-value= 0.79111  
 High Vs Low p-value= 0.609003

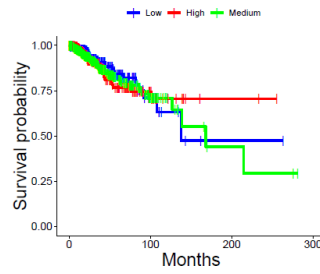

Survival Plot  
 Low Vs Medium p-value= 0.66723  
 High Vs Medium p-value= 0.95901  
 High Vs Low p-value= 0.67531

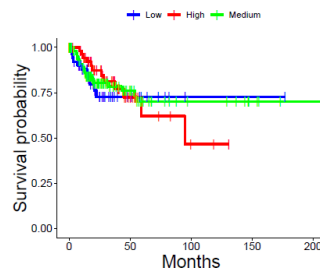

Survival Plot  
 Low Vs Medium p-value= 0.63620  
 High Vs Medium p-value= 0.99221  
 High Vs Low p-value= 0.659186

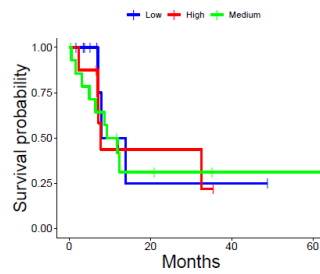

Survival Plot  
 Low Vs Medium p-value= 0.47645  
 High Vs Medium p-value= 0.93291  
 High Vs Low p-value= 0.492027

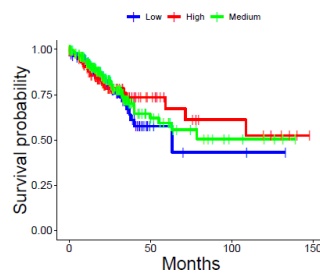

## Overall Survival

Survival Plot  
 Low Vs Medium p-value= 0.61062  
 High Vs Medium p-value= 0.45201  
 High Vs Low p-value= 0.844377

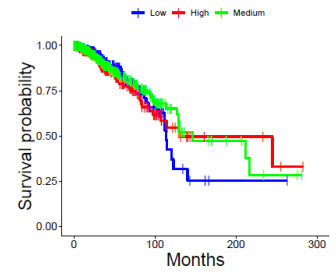

Survival Plot  
 Low Vs Medium p-value= 0.16809  
 High Vs Medium p-value= 0.44921  
 High Vs Low p-value= 0.076477

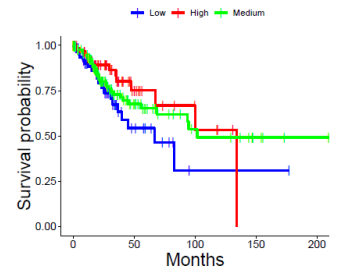

Survival Plot  
 Low Vs Medium p-value= 0.25615  
 High Vs Medium p-value= 0.96881  
 High Vs Low p-value= 0.277606

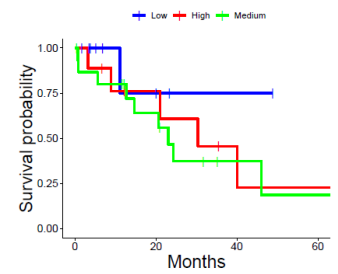

Survival Plot  
 Low Vs Medium p-value= 0.30121  
 High Vs Medium p-value= 0.57171  
 High Vs Low p-value= 0.168872

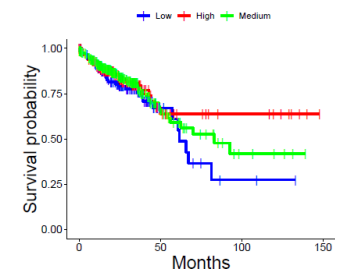

ESCA

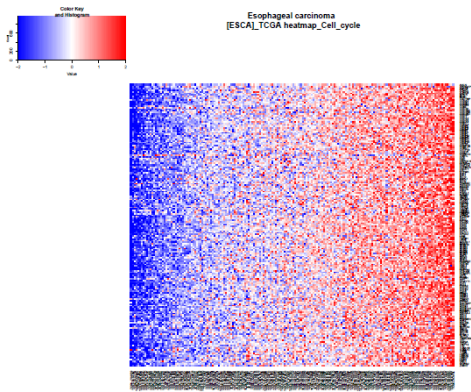

Disease Free Survival

Survival Plot  
 Low Vs Medium p-value= 0.82030  
 High Vs Medium p-value= 0.37971  
 High Vs Low p-value= 0.345873

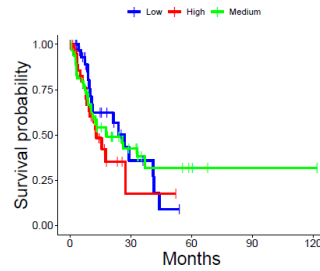

Overall Survival

Survival Plot  
 Low Vs Medium p-value= 0.54602  
 High Vs Medium p-value= 0.71997  
 High Vs Low p-value= 0.870866

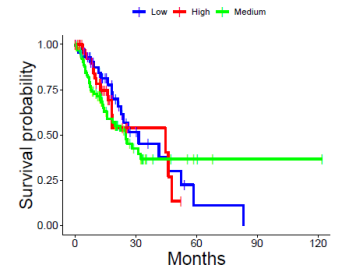

GBM

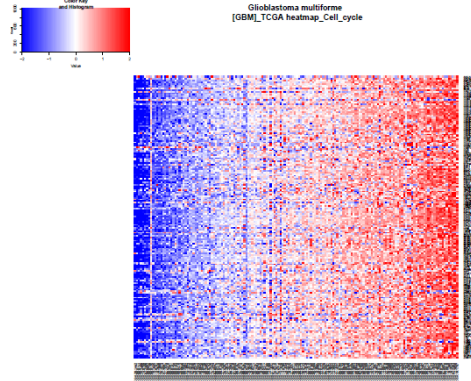

Survival Plot  
 Low Vs Medium p-value= 0.08449  
 High Vs Medium p-value= 0.17977  
 High Vs Low p-value= 0.673487

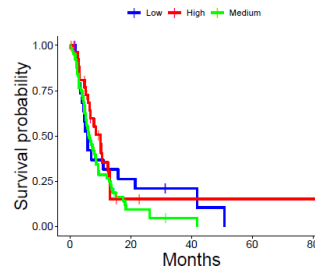

Survival Plot  
 Low Vs Medium p-value= 0.16045  
 High Vs Medium p-value= 0.03604  
 High Vs Low p-value= 0.498081

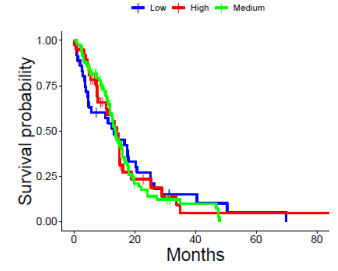

HNSC

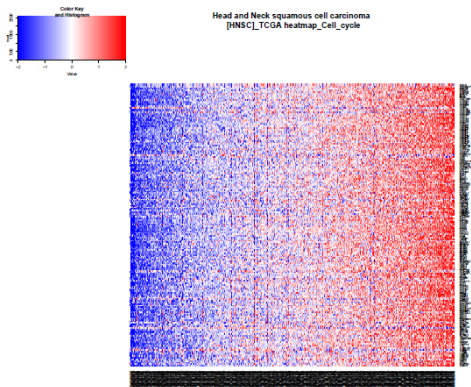

KICH

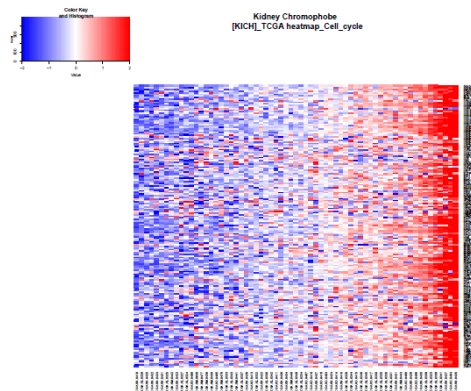

Survival Plot  
 Low Vs Medium p-value= 0.99838  
 High Vs Medium p-value= 0.00301  
 High Vs Low p-value= 0.998165

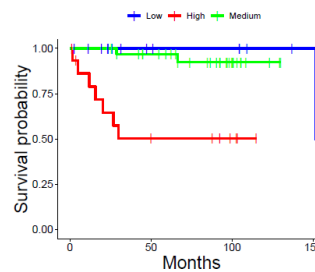

Survival Plot  
 Low Vs Medium p-value= 0.40610  
 High Vs Medium p-value= 0.00431  
 High Vs Low p-value= 0.080072

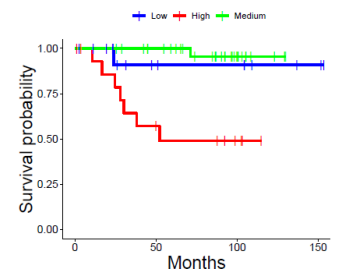



### KIRC

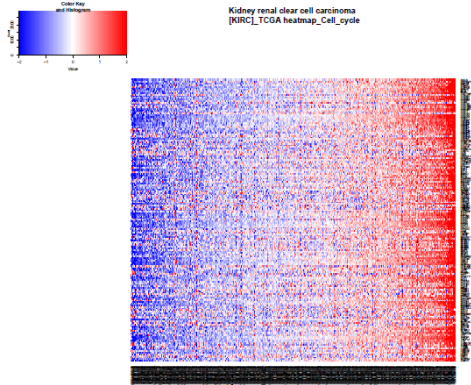

## Disease Free Survival

Survival Plot  
 Low Vs Medium p-value= 0.63887  
 High Vs Medium p-value= 4e-06  
 High Vs Low p-value= 4.2e-05

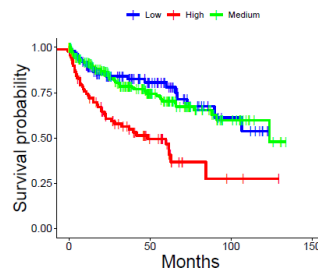

## Overall Survival

Survival Plot  
 Low Vs Medium p-value= 0.15604  
 High Vs Medium p-value= 0  
 High Vs Low p-value= 9e-06

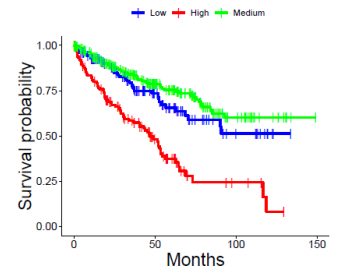

### KIRP

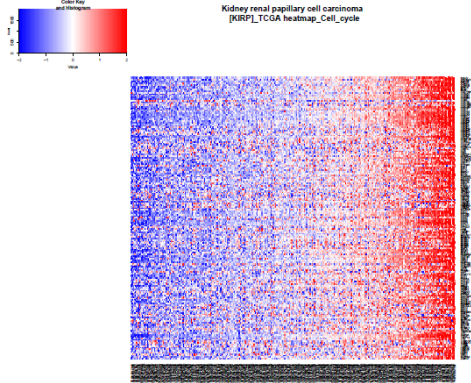

Survival Plot  
 Low Vs Medium p-value= 0.60592  
 High Vs Medium p-value= 0  
 High Vs Low p-value= 2.1e-05

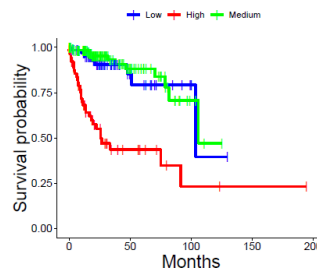

Survival Plot  
 Low Vs Medium p-value= 0.29141  
 High Vs Medium p-value= 2.9e-01  
 High Vs Low p-value= 0.000155

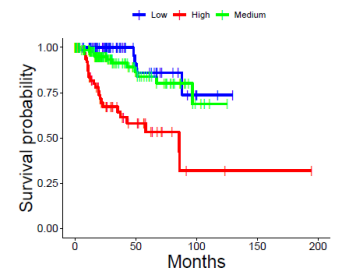

### LIHC

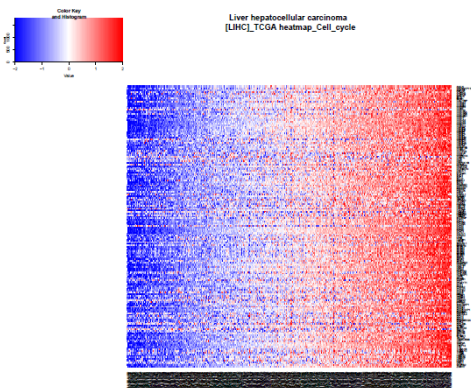

Survival Plot  
 Low Vs Medium p-value= 0.11497  
 High Vs Medium p-value= 0.00721  
 High Vs Low p-value= 0.000288

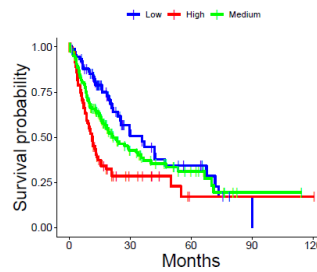

Survival Plot  
 Low Vs Medium p-value= 0.1032  
 High Vs Medium p-value= 0.0063  
 High Vs Low p-value= 0.000225

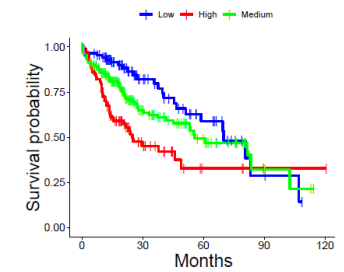

### LUAD

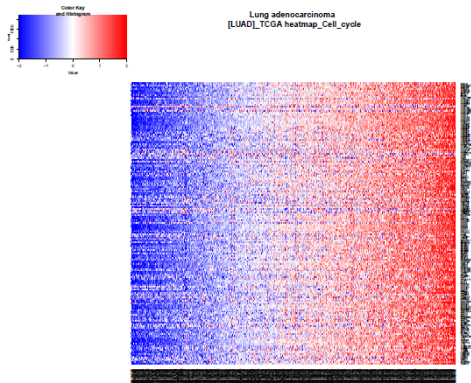

Survival Plot  
 Low Vs Medium p-value= 0.02646  
 High Vs Medium p-value= 0.79111  
 High Vs Low p-value= 0.076147

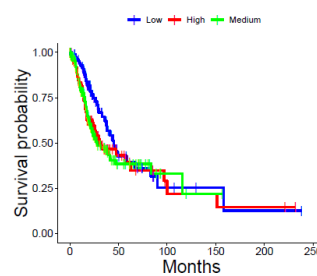

Survival Plot  
 Low Vs Medium p-value= 0.02591  
 High Vs Medium p-value= 0.55681  
 High Vs Low p-value= 0.010929

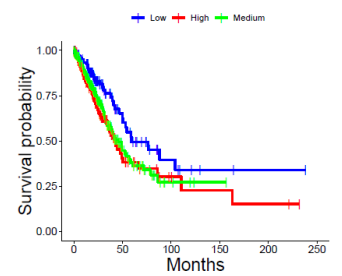

LUSC

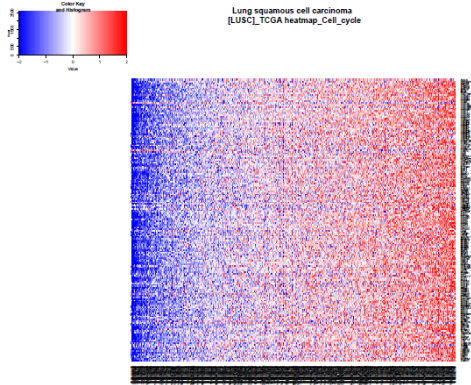

DLBC

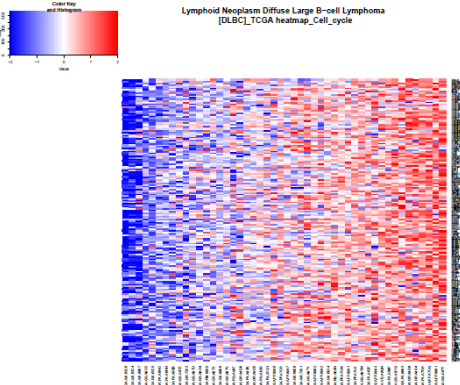

OV

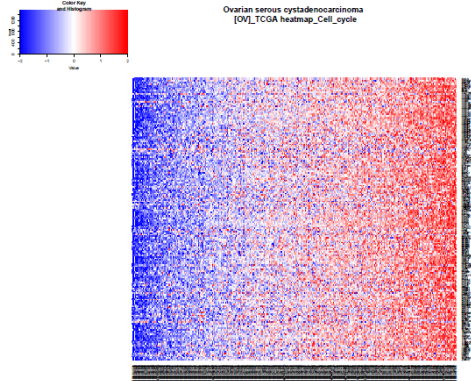

PAAD

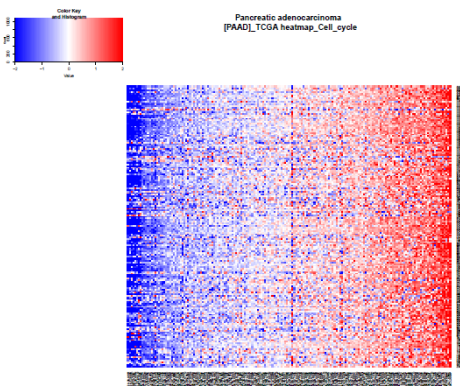

Disease Free Survival

Survival Plot  
 Low Vs Medium p-value= 0.50977  
 High Vs Medium p-value= 0.5718;  
 High Vs Low p-value= 0.294641

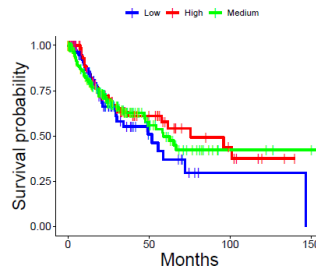

Survival Plot  
 Low Vs Medium p-value= 0.31813  
 High Vs Medium p-value= 0.3242!  
 High Vs Low p-value= 0.919844

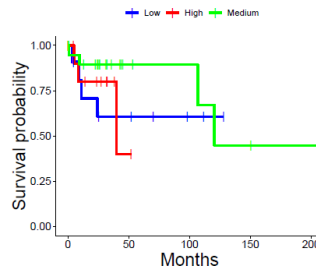

Survival Plot  
 Low Vs Medium p-value= 0.09121  
 High Vs Medium p-value= 0.8780!  
 High Vs Low p-value= 0.172101

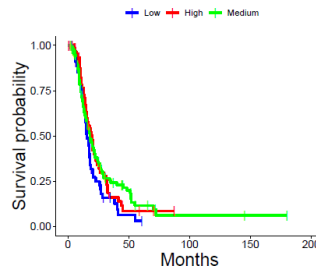

Survival Plot  
 Low Vs Medium p-value= 0.00283  
 High Vs Medium p-value= 0.1081;  
 High Vs Low p-value= 8e-05

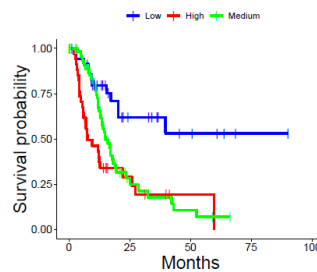

Overall Survival

Survival Plot  
 Low Vs Medium p-value= 0.04860  
 High Vs Medium p-value= 0.9320!  
 High Vs Low p-value= 0.08912

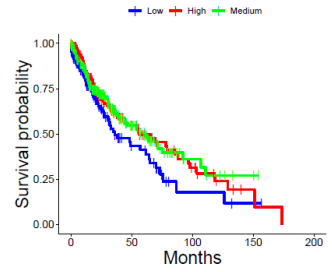

Survival Plot  
 Low Vs Medium p-value= 0.30534  
 High Vs Medium p-value= 0.9987!  
 High Vs Low p-value= 0.998722

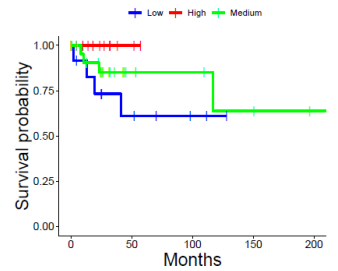

Survival Plot  
 Low Vs Medium p-value= 0.95492  
 High Vs Medium p-value= 0.2014!  
 High Vs Low p-value= 0.239273

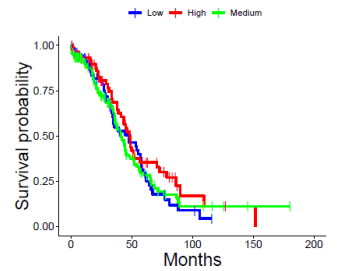

Survival Plot  
 Low Vs Medium p-value= 0.01454  
 High Vs Medium p-value= 0.1144  
 High Vs Low p-value= 0.000586

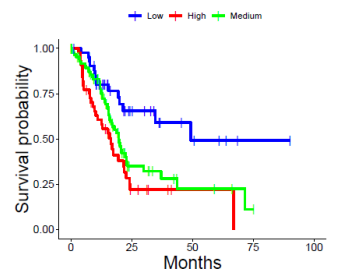

Disease Free Survival

Overall Survival

PCPG

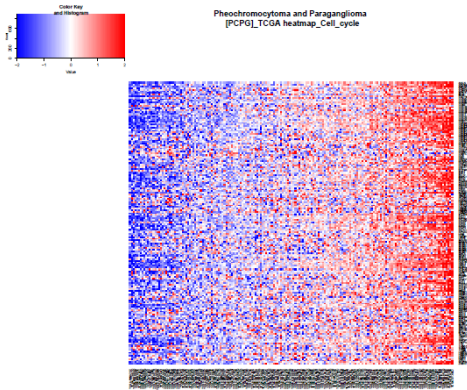

PRAD

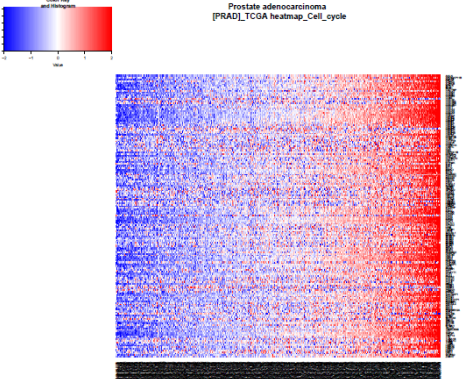

SARC

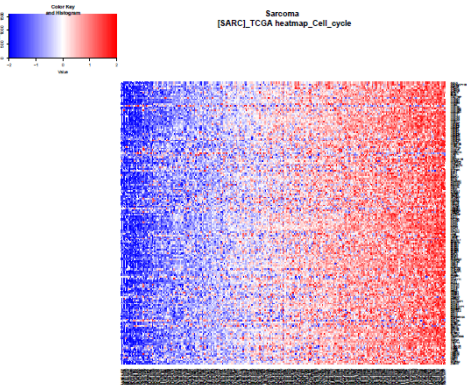

SKCM

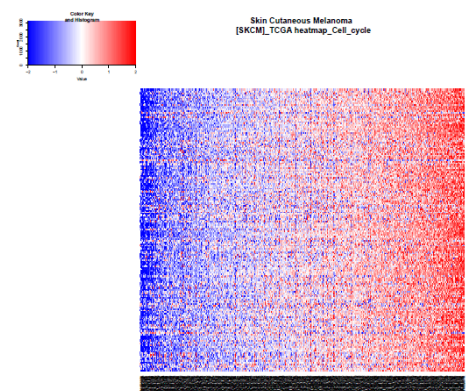

NA

NA

Survival Plot  
 Low Vs Medium p-value= 0.06614  
 High Vs Medium p-value= 0.00055  
 High Vs Low p-value= 3.2e-05

Survival Plot  
 Low Vs Medium p-value= 0.41243  
 High Vs Medium p-value= 0.70103  
 High Vs Low p-value= 0.311001

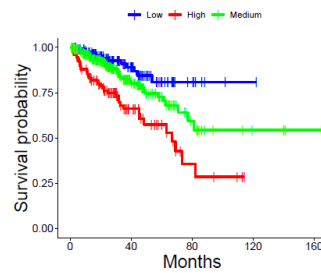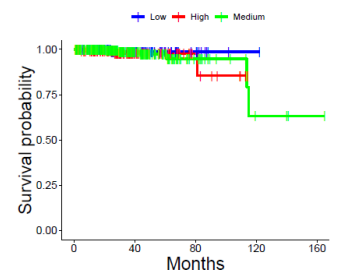

Survival Plot  
 Low Vs Medium p-value= 0.19458  
 High Vs Medium p-value= 0.04911  
 High Vs Low p-value= 0.005133

Survival Plot  
 Low Vs Medium p-value= 0.11058  
 High Vs Medium p-value= 0.22224  
 High Vs Low p-value= 0.015154

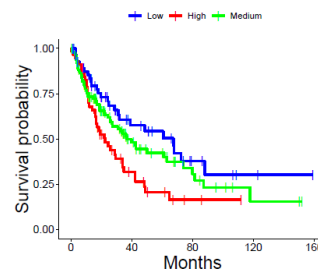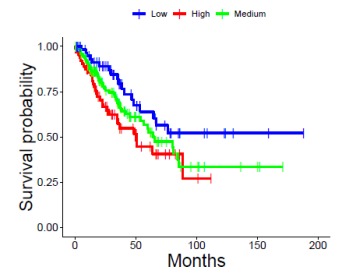

Survival Plot  
 Low Vs Medium p-value= 0.00537  
 High Vs Medium p-value= 0.62063  
 High Vs Low p-value= 0.034235

Survival Plot  
 Low Vs Medium p-value= 0.0557  
 High Vs Medium p-value= 0.9913  
 High Vs Low p-value= 0.083726

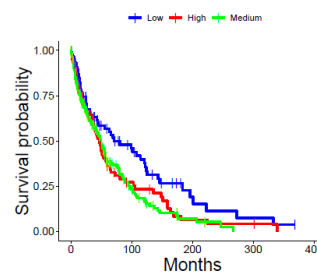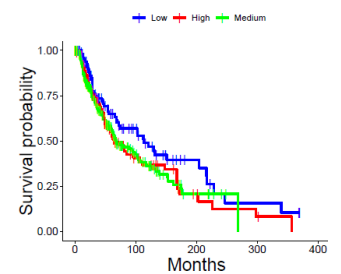

### STAD

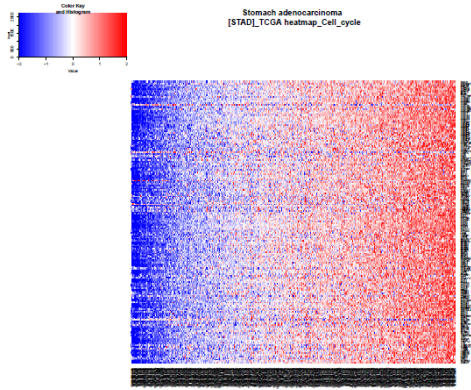

### TGCT

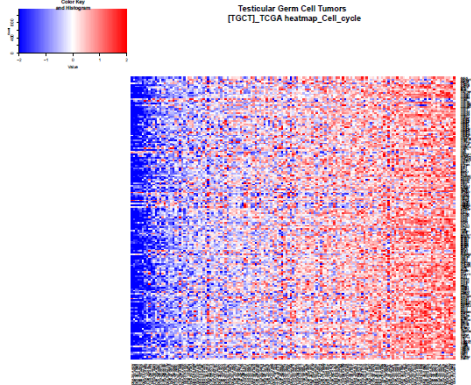

### THYM

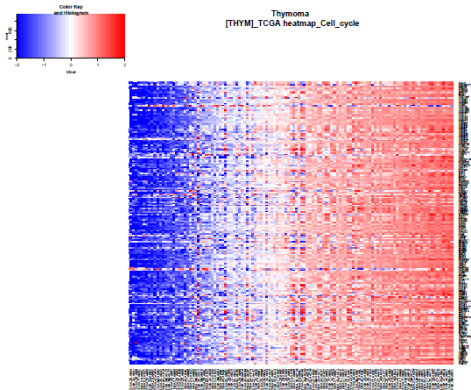

### THCA

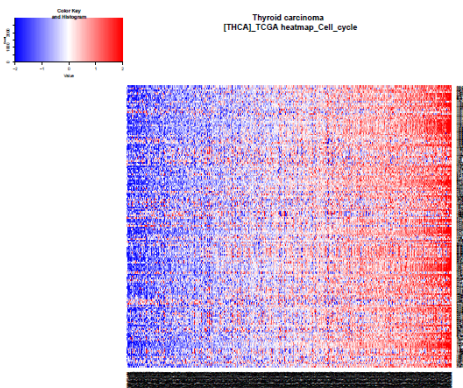

## Disease Free Survival

Survival Plot  
 Low Vs Medium p-value= 0.04413  
 High Vs Medium p-value= 0.65041  
 High Vs Low p-value= 0.189977

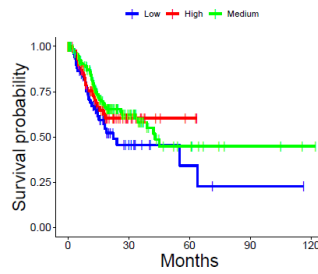

Survival Plot  
 Low Vs Medium p-value= 0.15750  
 High Vs Medium p-value= 0.53511  
 High Vs Low p-value= 0.3846

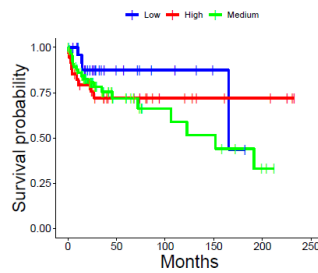

Survival Plot  
 Low Vs Medium p-value= 0.70224  
 High Vs Medium p-value= 0.55211  
 High Vs Low p-value= 0.395894

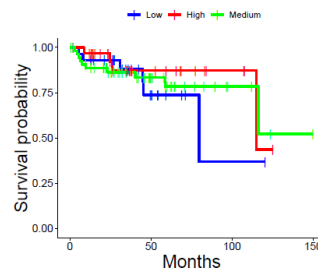

Survival Plot  
 Low Vs Medium p-value= 0.75031  
 High Vs Medium p-value= 0.00151  
 High Vs Low p-value= 0.007122

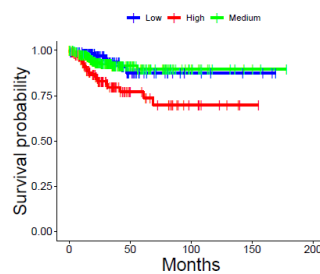

## Overall Survival

Survival Plot  
 Low Vs Medium p-value= 0.04678  
 High Vs Medium p-value= 0.59241  
 High Vs Low p-value= 0.22206

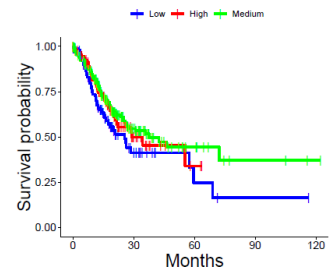

Survival Plot  
 Low Vs Medium p-value= 0.86824  
 High Vs Medium p-value= 0.99881  
 High Vs Low p-value= 0.998804

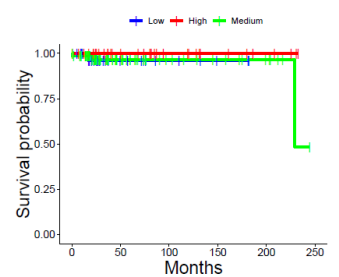

Survival Plot  
 Low Vs Medium p-value= 0.78512  
 High Vs Medium p-value= 0.99831  
 High Vs Low p-value= 0.998332

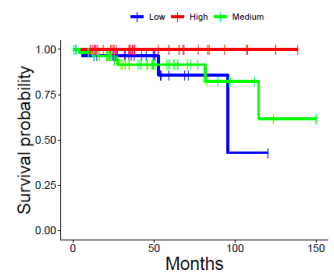

Survival Plot  
 Low Vs Medium p-value= 0.16938  
 High Vs Medium p-value= 0.77791  
 High Vs Low p-value= 0.344911

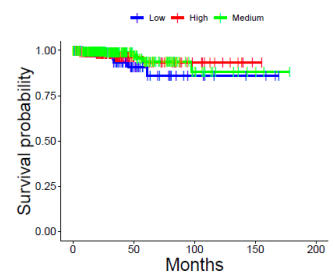

## UCS

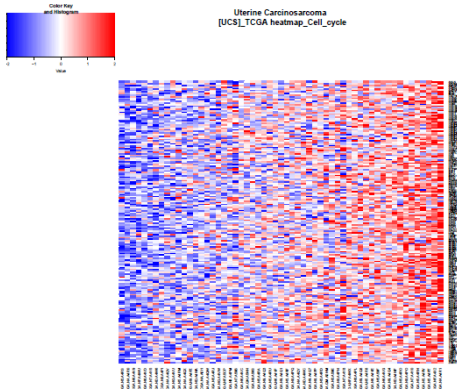

## Disease Free Survival

Survival Plot  
 Low Vs Medium p-value= 0.02271  
 High Vs Medium p-value= 0.66211  
 High Vs Low p-value= 0.015482

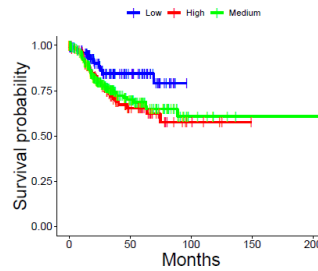

## Overall Survival

Survival Plot  
 Low Vs Medium p-value= 0.02166  
 High Vs Medium p-value= 0.90841  
 High Vs Low p-value= 0.028609

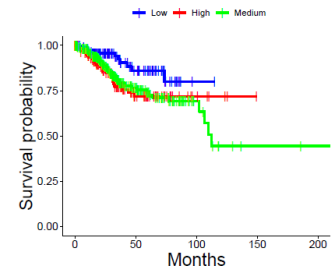

## UCEC

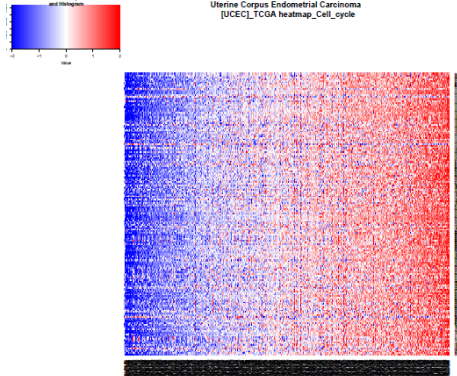

NA

NA

## UVM

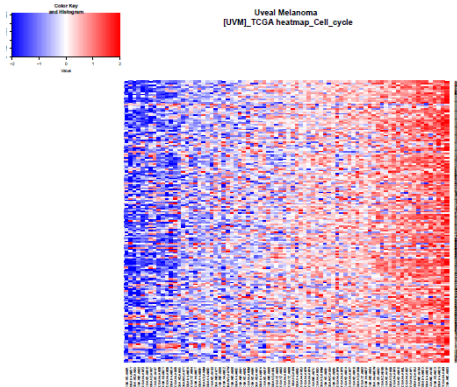

Survival Plot  
 Low Vs Medium p-value= 0.99840  
 High Vs Medium p-value= 0.02971  
 High Vs Low p-value= 0.998304

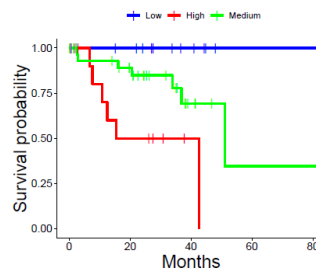

Survival Plot  
 Low Vs Medium p-value= 0.91215  
 High Vs Medium p-value= 0.45881  
 High Vs Low p-value= 0.44823

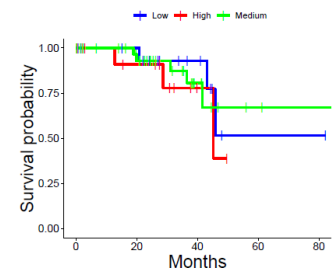

**Supplementary Figure 14:** Heatmaps illustrate the behavior of the CDK4/6-RB integrated signature across all tumors in the pan-cancer data set clustered based on average signature value. The corresponding Kaplan-Meier analysis is based on the average CDK4/6-RB integrated signature: high 25%, medium 50%, and low 25%. Statistical significance was determined by log-rank test. Both the disease-free survival and overall survival results are shown for all cases for which the data is available. Table summarizes the mean and median overall and disease-free survival of different tumors types in the TCGA pan-cancer cohort. NA indicates that survival data is not available for that tumor type.

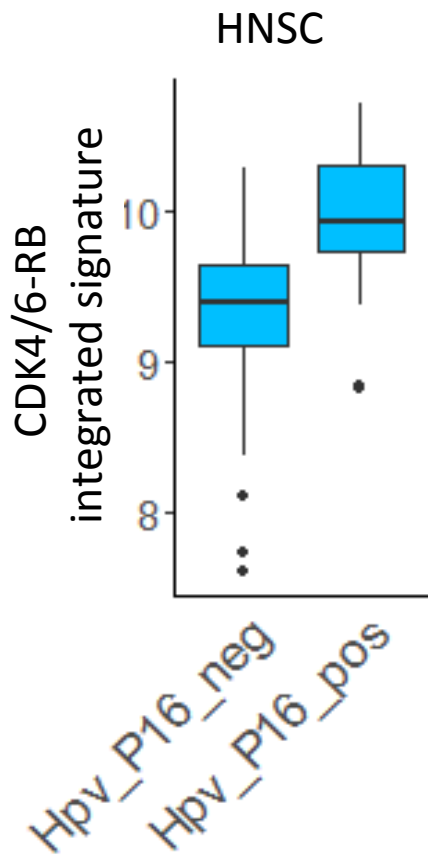

**Supplementary Figure 15:** Expression of the CDK4/6-RB integrated signature in HNSC HPV p16-positive (N=41) vs. HPV p16-negative cases (N=74). The statistical significance was determined by two-sided Student's t-test.

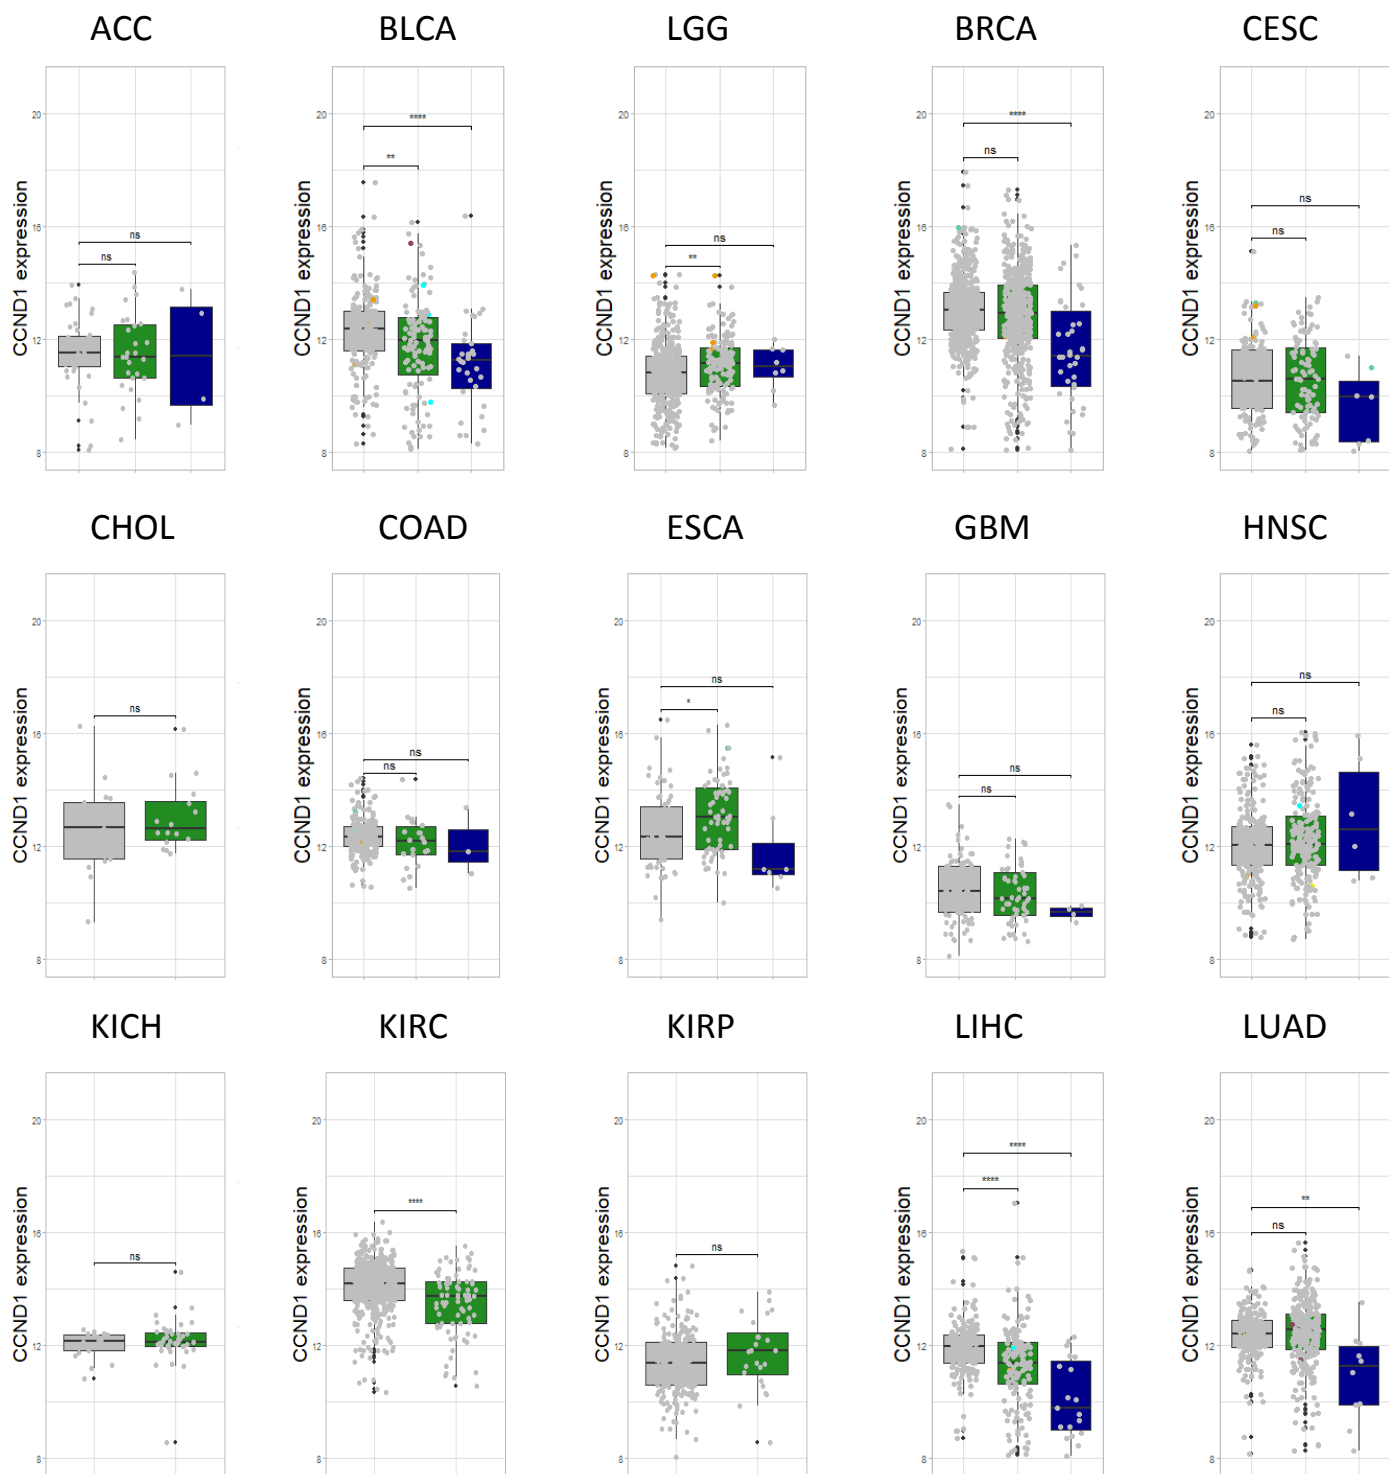

Type

-  Diploid(RB1)
-  Heterozygous Deletion(RB1)
-  Homozygous Deletion(RB1)

Mutation

- None
- Silent
- 3'UTR
- Missense\_Mutation
- Frame\_Shift\_Ins
- Nonsense\_Mutation
- Frame\_Shift\_Del
- Splice\_Site

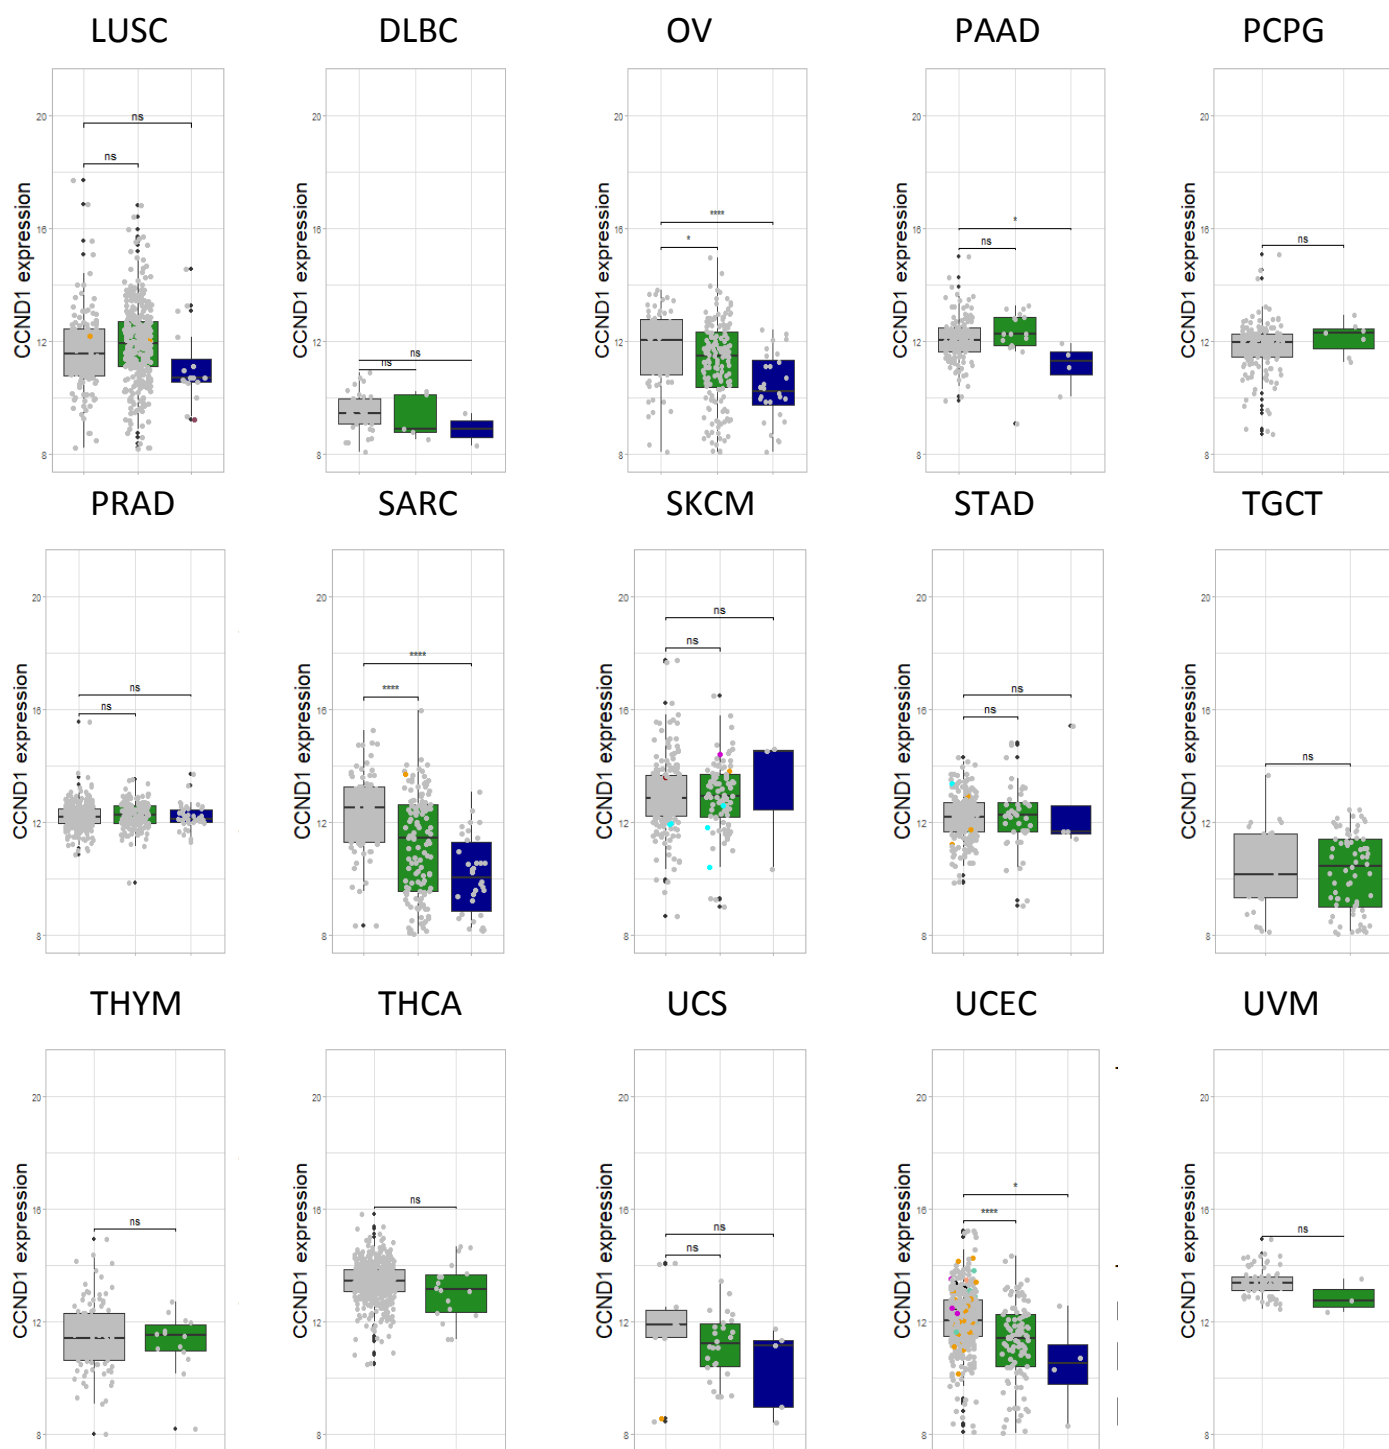

## Type

- Diploid(RB1)
- Heterozygous Deletion(RB1)
- Homozygous Deletion(RB1)

## Mutation

- None
- Silent
- 3'UTR
- Missense\_Mutation
- Frame\_Shift\_Ins
- Nonsense\_Mutation
- Frame\_Shift\_Del
- Splice\_Site

**Supplementary Figure 16:** Analysis of CCND1 expression in tumors exhibiting diploid, heterozygous loss, or deletion of the RB1 locus. The data from each tumor type and all cases is summarized in the bar plots and statistical significance was determined by two-sided Student's t-test (\* $p < 0.05$ , \*\* $p < 0.01$ , \*\*\* $p < 0.001$ , \*\*\*\* $p < 0.0001$ ).



## RB1 deletion vs. wild-type

| Term                                                     | P-value   | Adjusted P-value |
|----------------------------------------------------------|-----------|------------------|
| DNA metabolic process (GO:0006259)                       | 1.77E-36  | 9.04E-33         |
| DNA replication (GO:0006260)                             | 1.28E-31  | 3.26E-28         |
| G1/S transition of mitotic cell cycle (GO:0000082)       | 5.52E-30  | 9.39E-27         |
| mitotic cell cycle phase transition (GO:0044772)         | 1.82E-25  | 2.33E-22         |
| cell cycle G1/S phase transition (GO:0044843)            | 2.84E-23  | 2.90E-20         |
| mitotic sister chromatid segregation (GO:0000070)        | 1.52E-19  | 1.29E-16         |
| cellular macromolecule biosynthetic process (GO:0034645) | 2.02E-19  | 1.47E-16         |
| mitotic spindle organization (GO:0007052)                | 9.13E-19  | 5.83E-16         |
| DNA repair (GO:0006281)                                  | 1.27E-17  | 7.20E-15         |
| DNA-dependent DNA replication (GO:0006261)               | 1.68E-17  | 8.59E-15         |
| Term                                                     | P-value   | Adjusted P-value |
| E2F4_ENCODE                                              | 1.35E-146 | 1.41E-144        |
| FOXM1_ENCODE                                             | 2.19E-38  | 1.14E-36         |
| NFYB_ENCODE                                              | 1.67E-31  | 5.80E-30         |
| E2F6_ENCODE                                              | 1.81E-30  | 4.70E-29         |

## RB1 single copy loss vs. wild-type

| Term                                                           | P-value  | Adjusted P-value |
|----------------------------------------------------------------|----------|------------------|
| mitotic sister chromatid segregation (GO:0000070)              | 2.37E-23 | 1.21E-19         |
| mitotic spindle organization (GO:0007052)                      | 8.93E-19 | 2.28E-15         |
| metaphase plate congression (GO:0051310)                       | 2.18E-16 | 3.70E-13         |
| regulation of mitotic cell cycle phase transition (GO:1901990) | 8.62E-16 | 1.10E-12         |
| mitotic metaphase plate congression (GO:0007080)               | 1.20E-14 | 1.22E-11         |
| mitotic nuclear division (GO:0140014)                          | 9.31E-14 | 7.92E-11         |
| Term                                                           | P-value  | Adjusted P-value |
| E2F4_ENCODE                                                    | 9.62E-95 | 1.00E-92         |
| FOXM1_ENCODE                                                   | 3.06E-43 | 1.59E-41         |
| SIN3A_ENCODE                                                   | 5.49E-30 | 1.90E-28         |
| NFYA_ENCODE                                                    | 4.88E-23 | 1.27E-21         |

**Supplementary Figure 17:** Gene ontology and enriched transcription factor binding sites of genes consistently up-regulated with homozygous deletion or heterozygous loss of RB1. The analysis was performed using ENRICH and top terms are summarized.

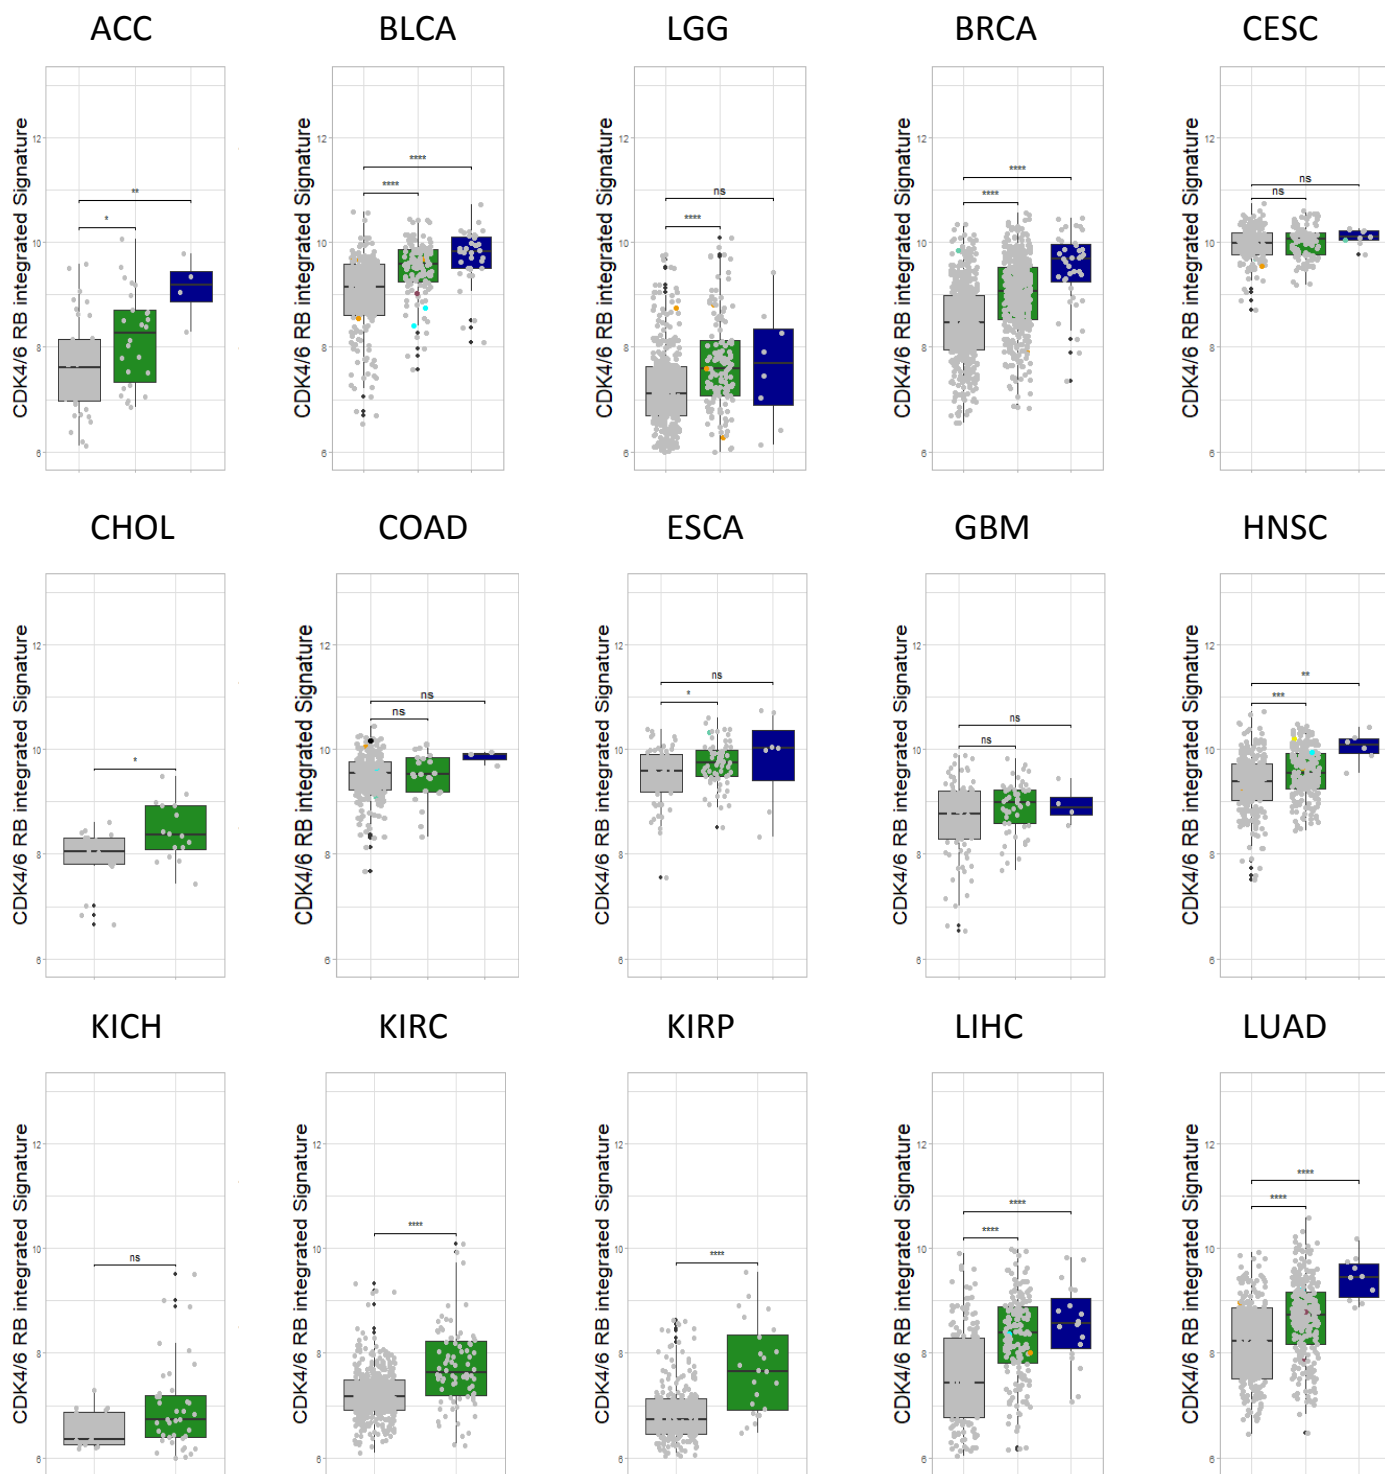

Type

-  Diploid(RB1)
-  Heterozygous Deletion(RB1)
-  Homozygous Deletion(RB1)

Mutation

-  None
-  Silent
-  3'UTR
-  Missense\_Mutation
-  Frame\_Shift\_Ins
-  Nonsense\_Mutation
-  Frame\_Shift\_Del
-  Splice\_Site

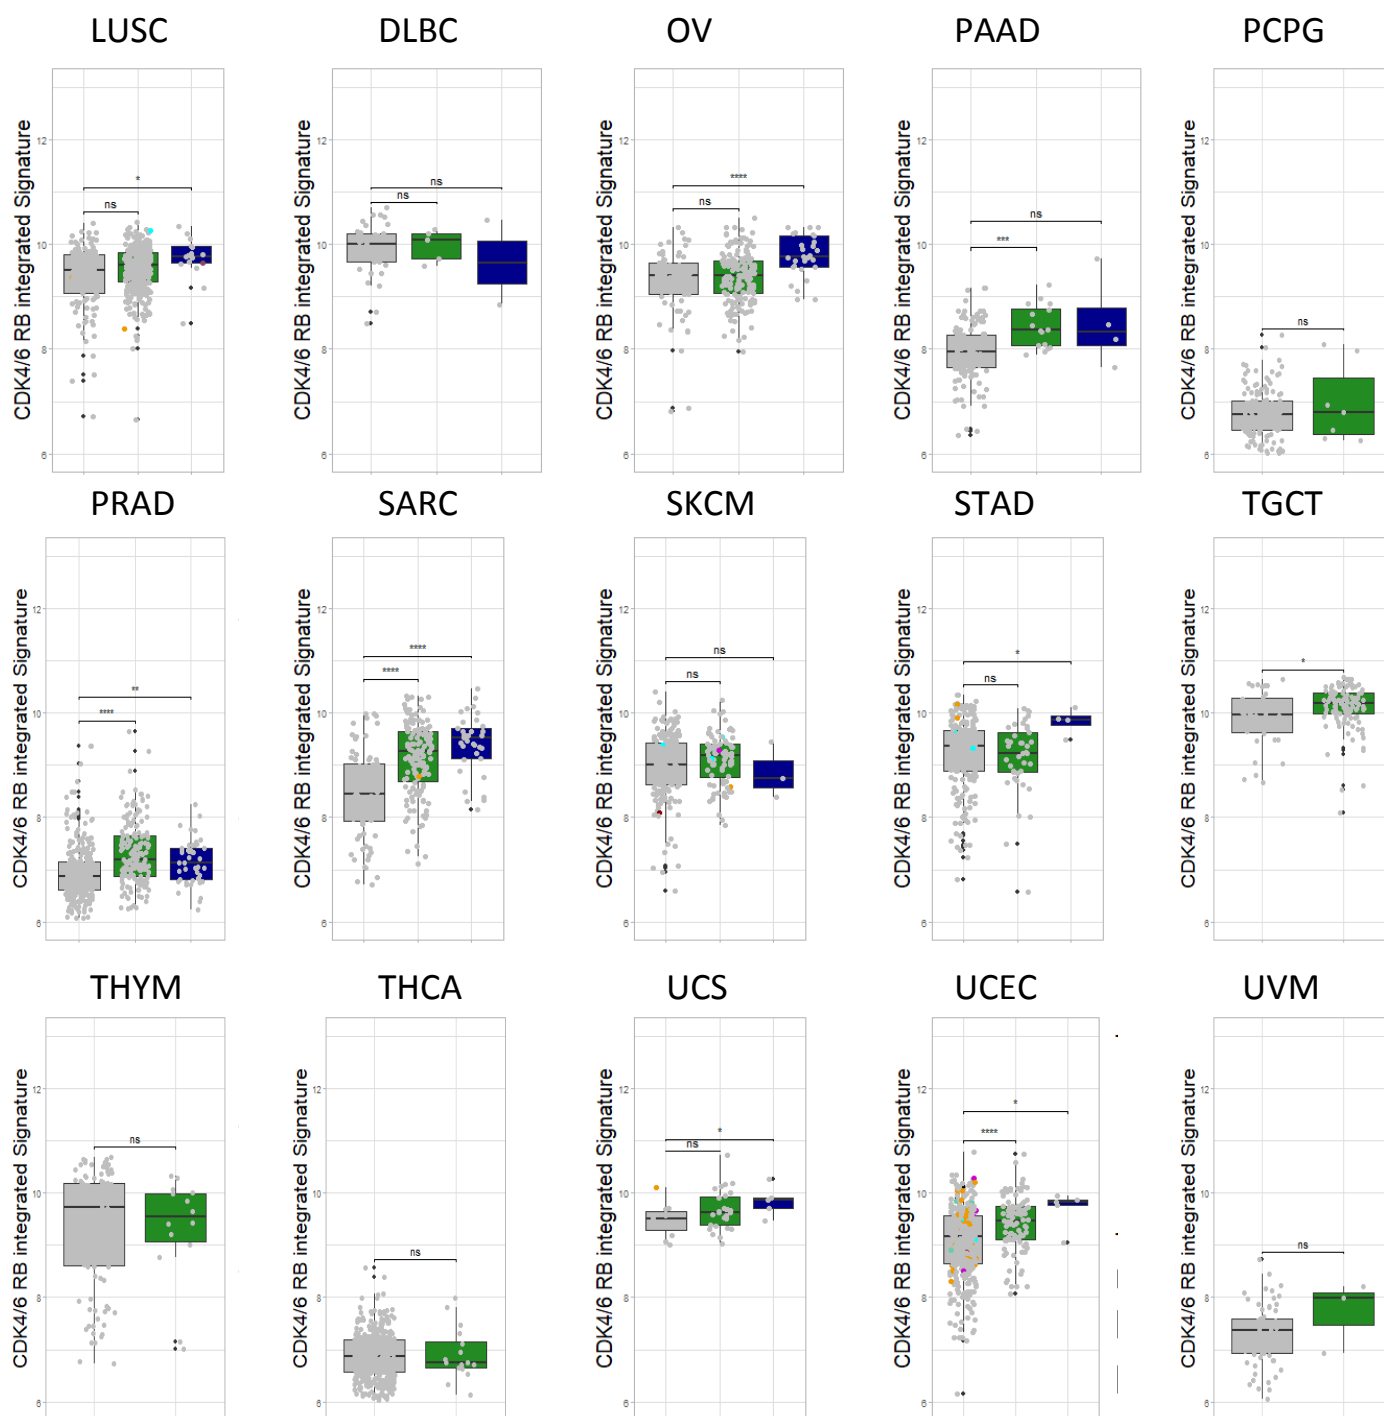

## Type

- Diploid(RB1)
- Heterozygous Deletion(RB1)
- Homozygous Deletion(RB1)

## Mutation

- None
- Silent
- 3'UTR
- Missense\_Mutation
- Frame\_Shift\_Ins
- Nonsense\_Mutation
- Frame\_Shift\_Del
- Splice\_Site

**Supplementary Figure 18:** Analysis of CDK4/6 RB integrated signature expression in tumors exhibiting diploid, heterozygous loss, or deletion of the RB1 locus. The data from each tumor type and all cases is summarized in the bar plots and statistical significance was determined by two-sided Student's t-test (\* $p < 0.05$  \*\* $p < 0.01$ , \*\*\* $p < 0.001$ ). Legend denotes different forms of RB1 gene alterations beyond copy number changes

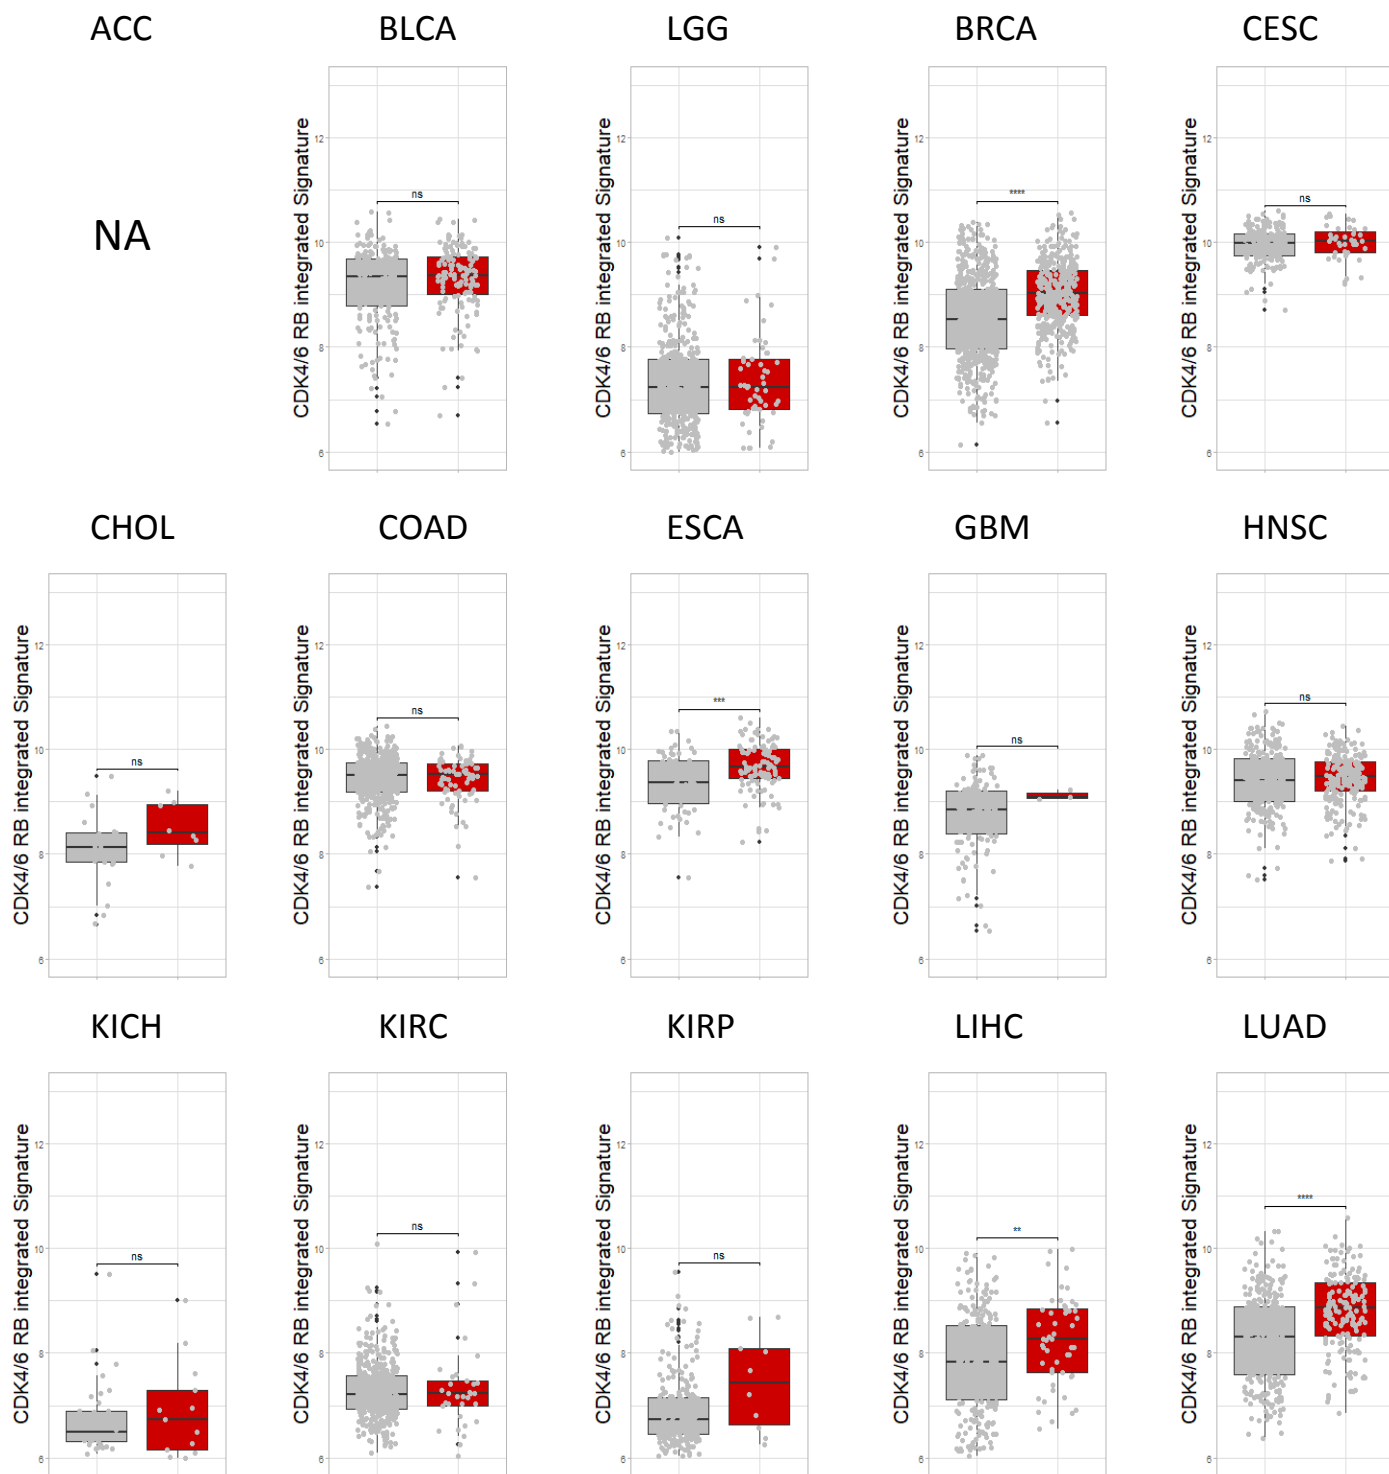

Type

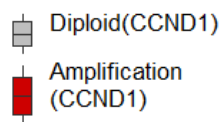

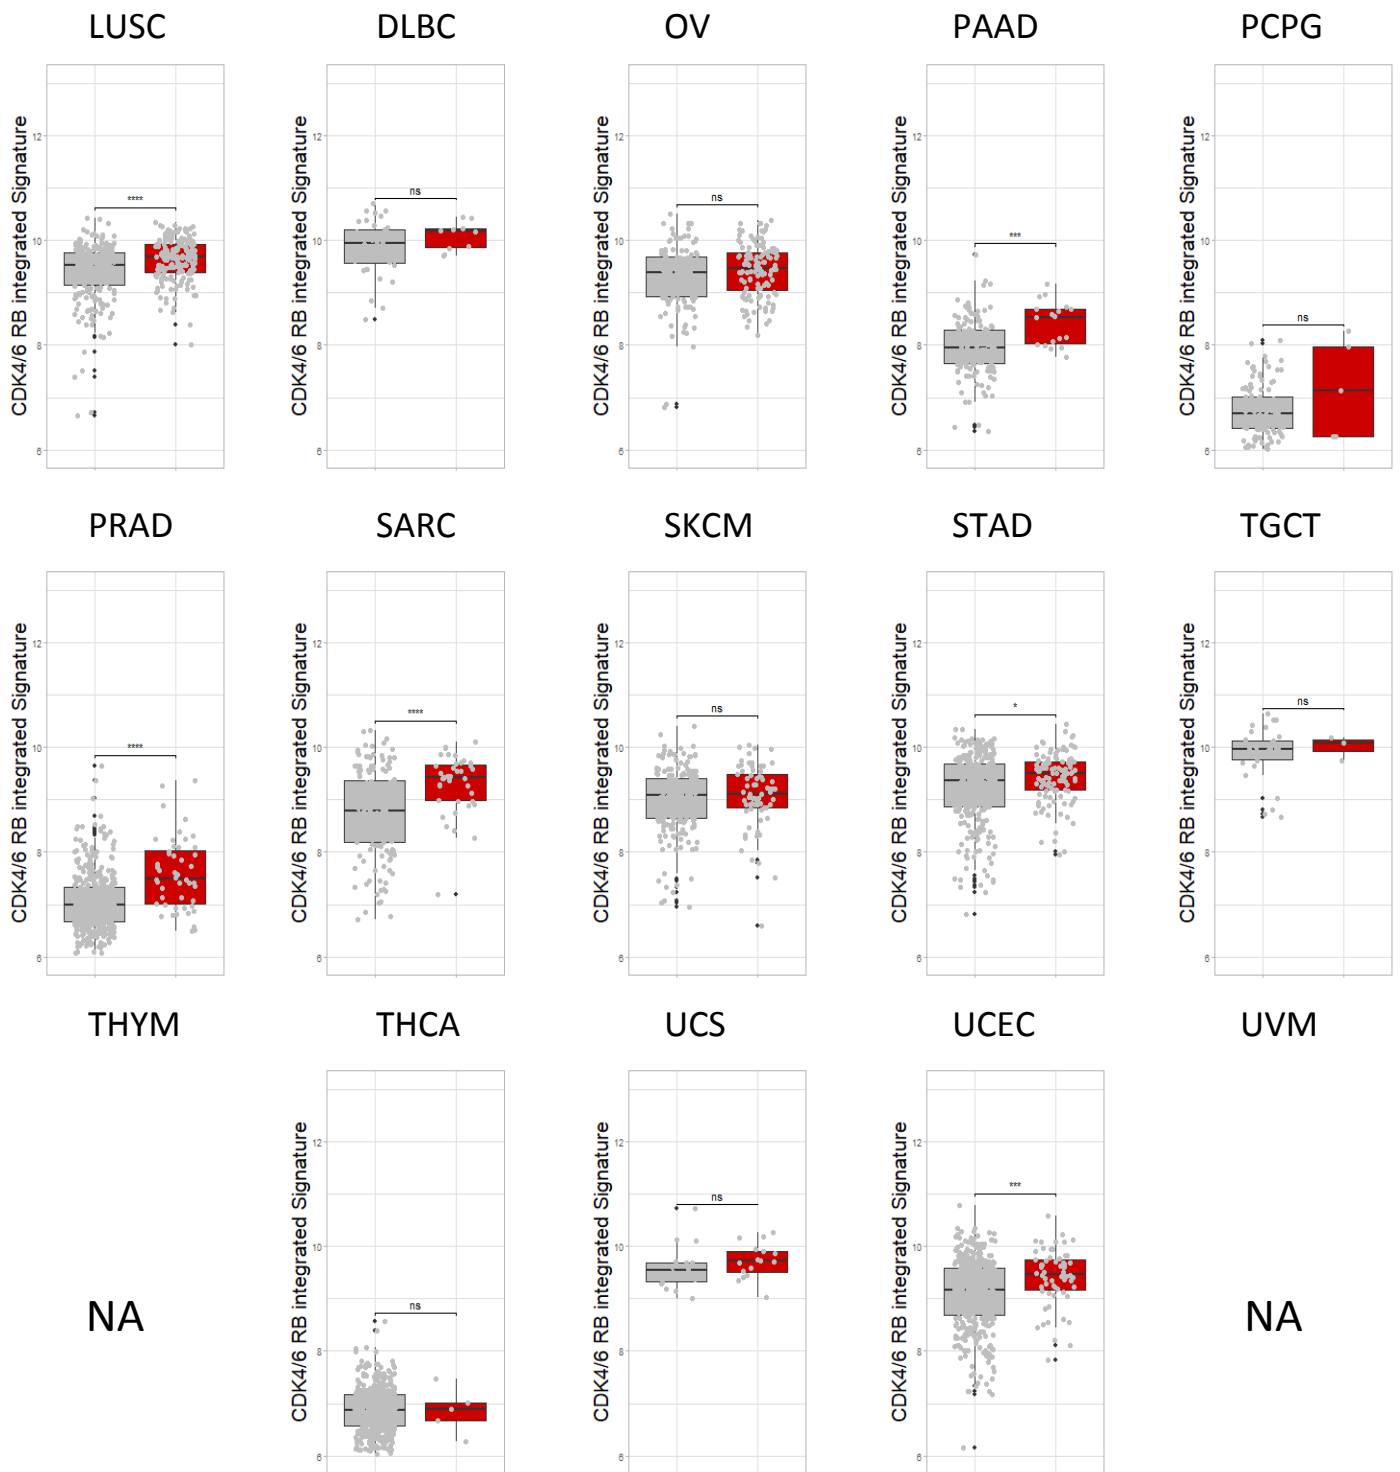

**Supplementary Figure 19:** Analysis of the CDK4/6 RB integrated signature stratified by amplification of CCND1. The number of cases in each group is shown. Statistical significance was determined by two-sided Student's t-test.

Type  
 Diploid(CCND1)  
 Amplification (CCND1)

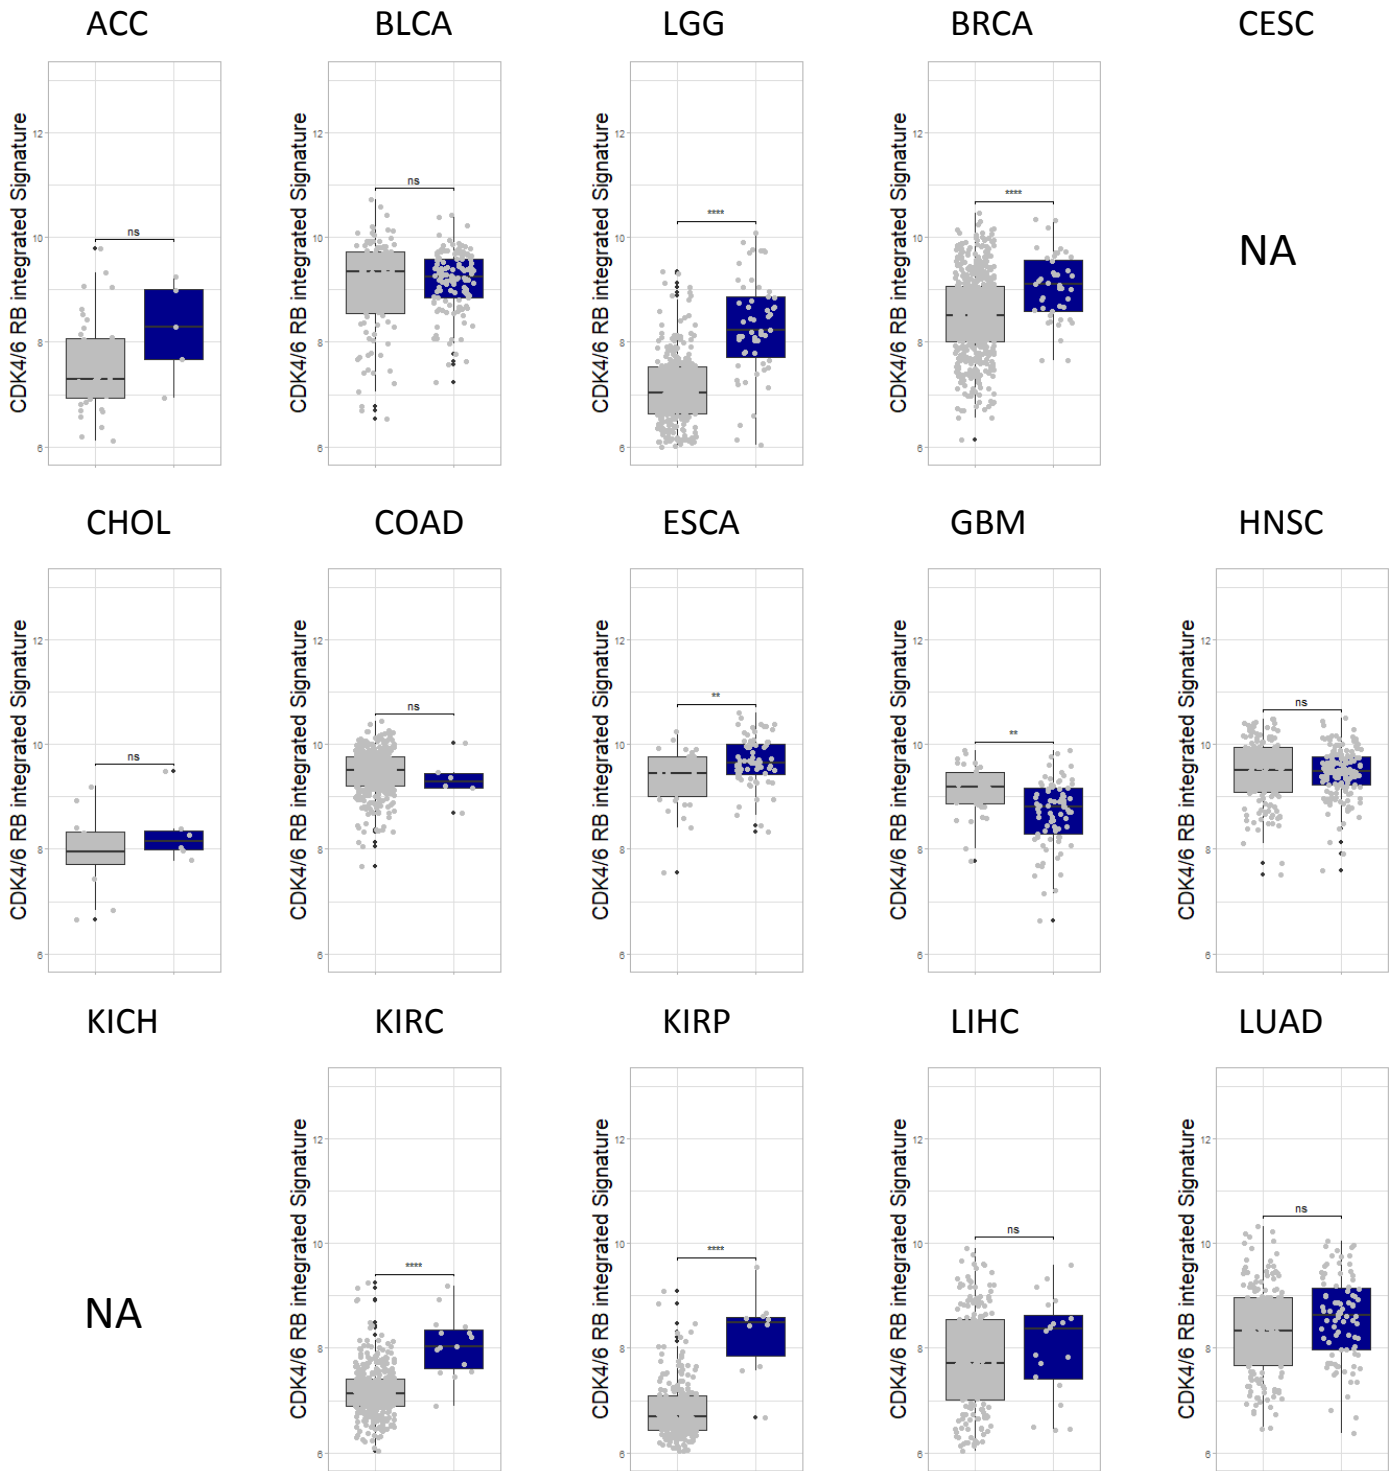

Type

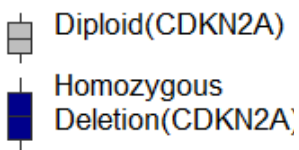

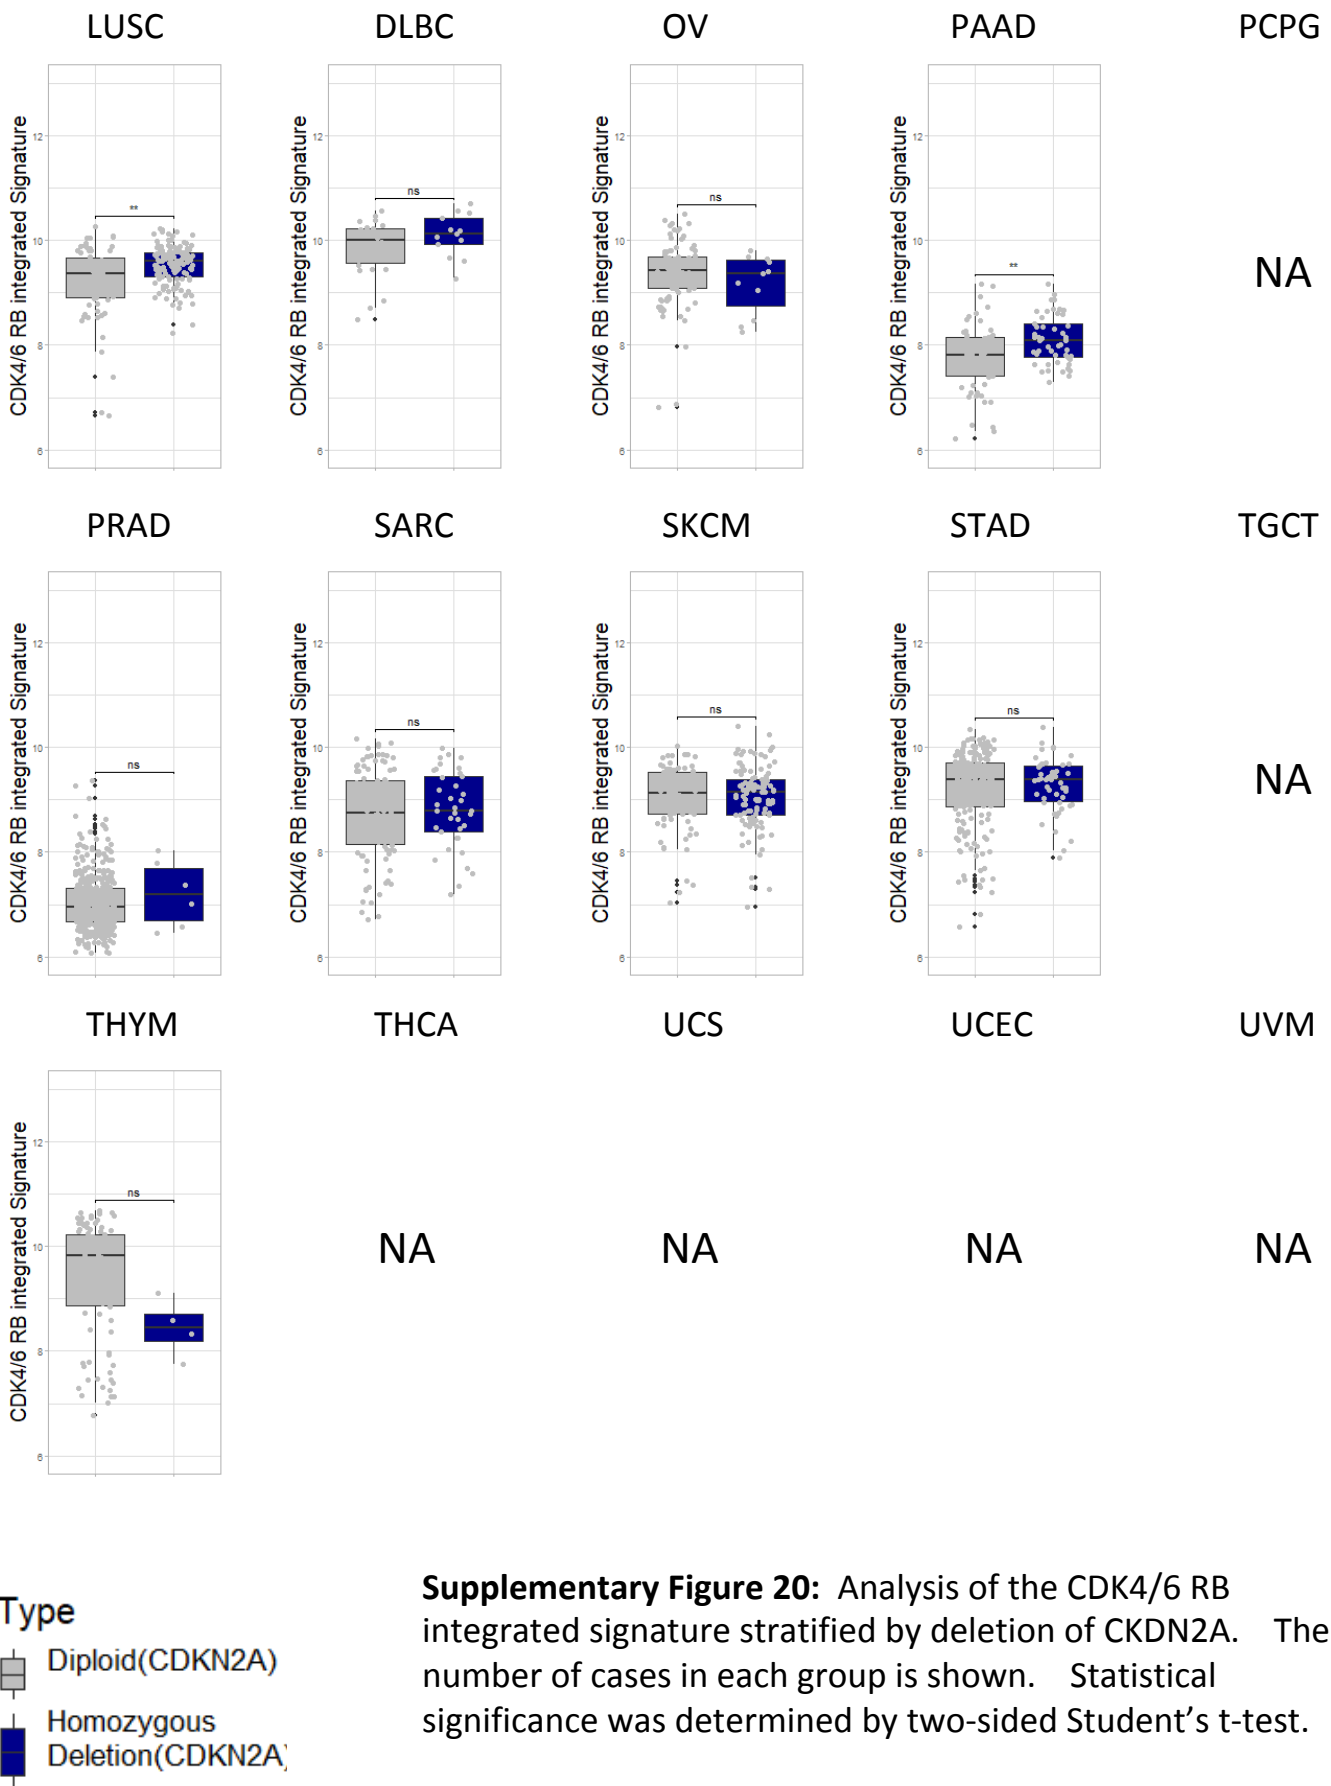

**Supplementary Figure 20:** Analysis of the CDK4/6 RB integrated signature stratified by deletion of CDKN2A. The number of cases in each group is shown. Statistical significance was determined by two-sided Student's t-test.

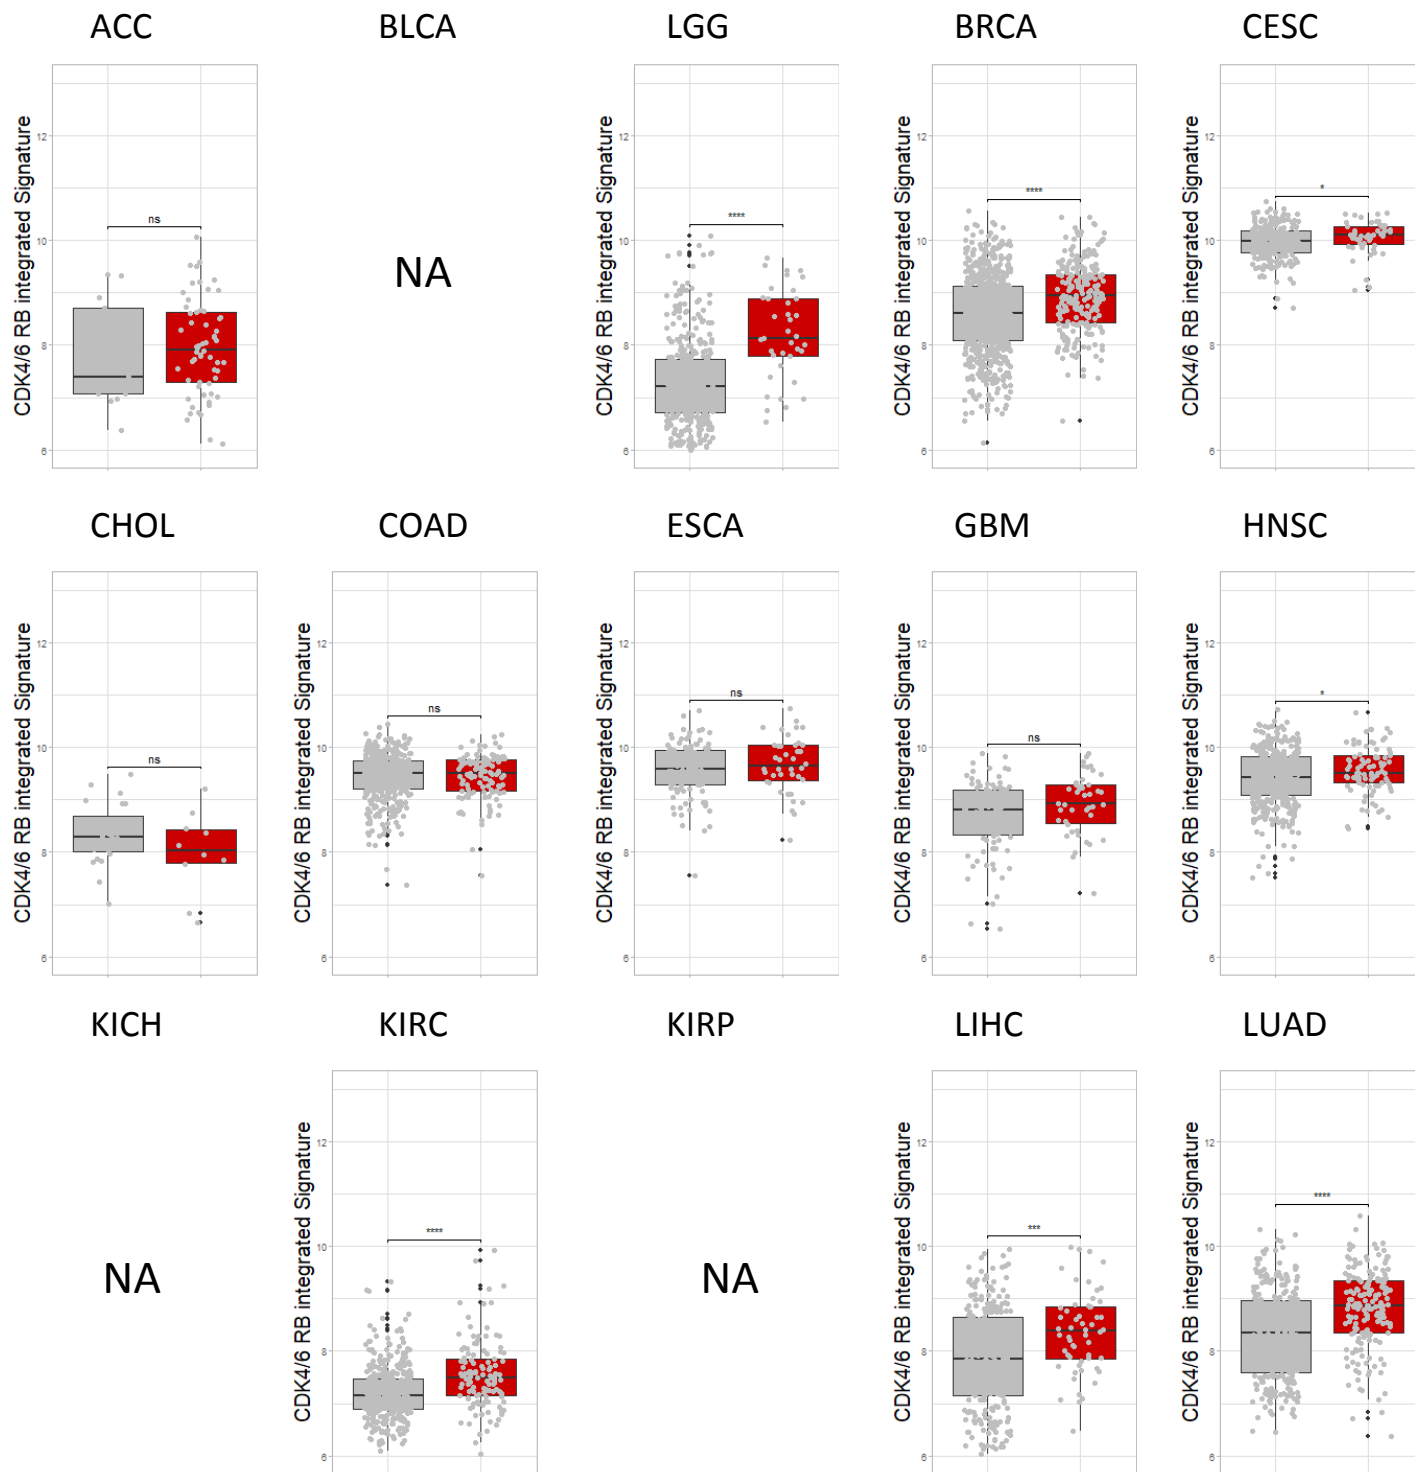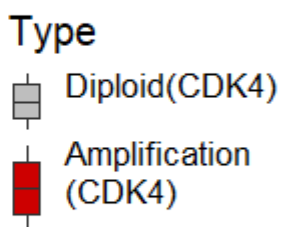



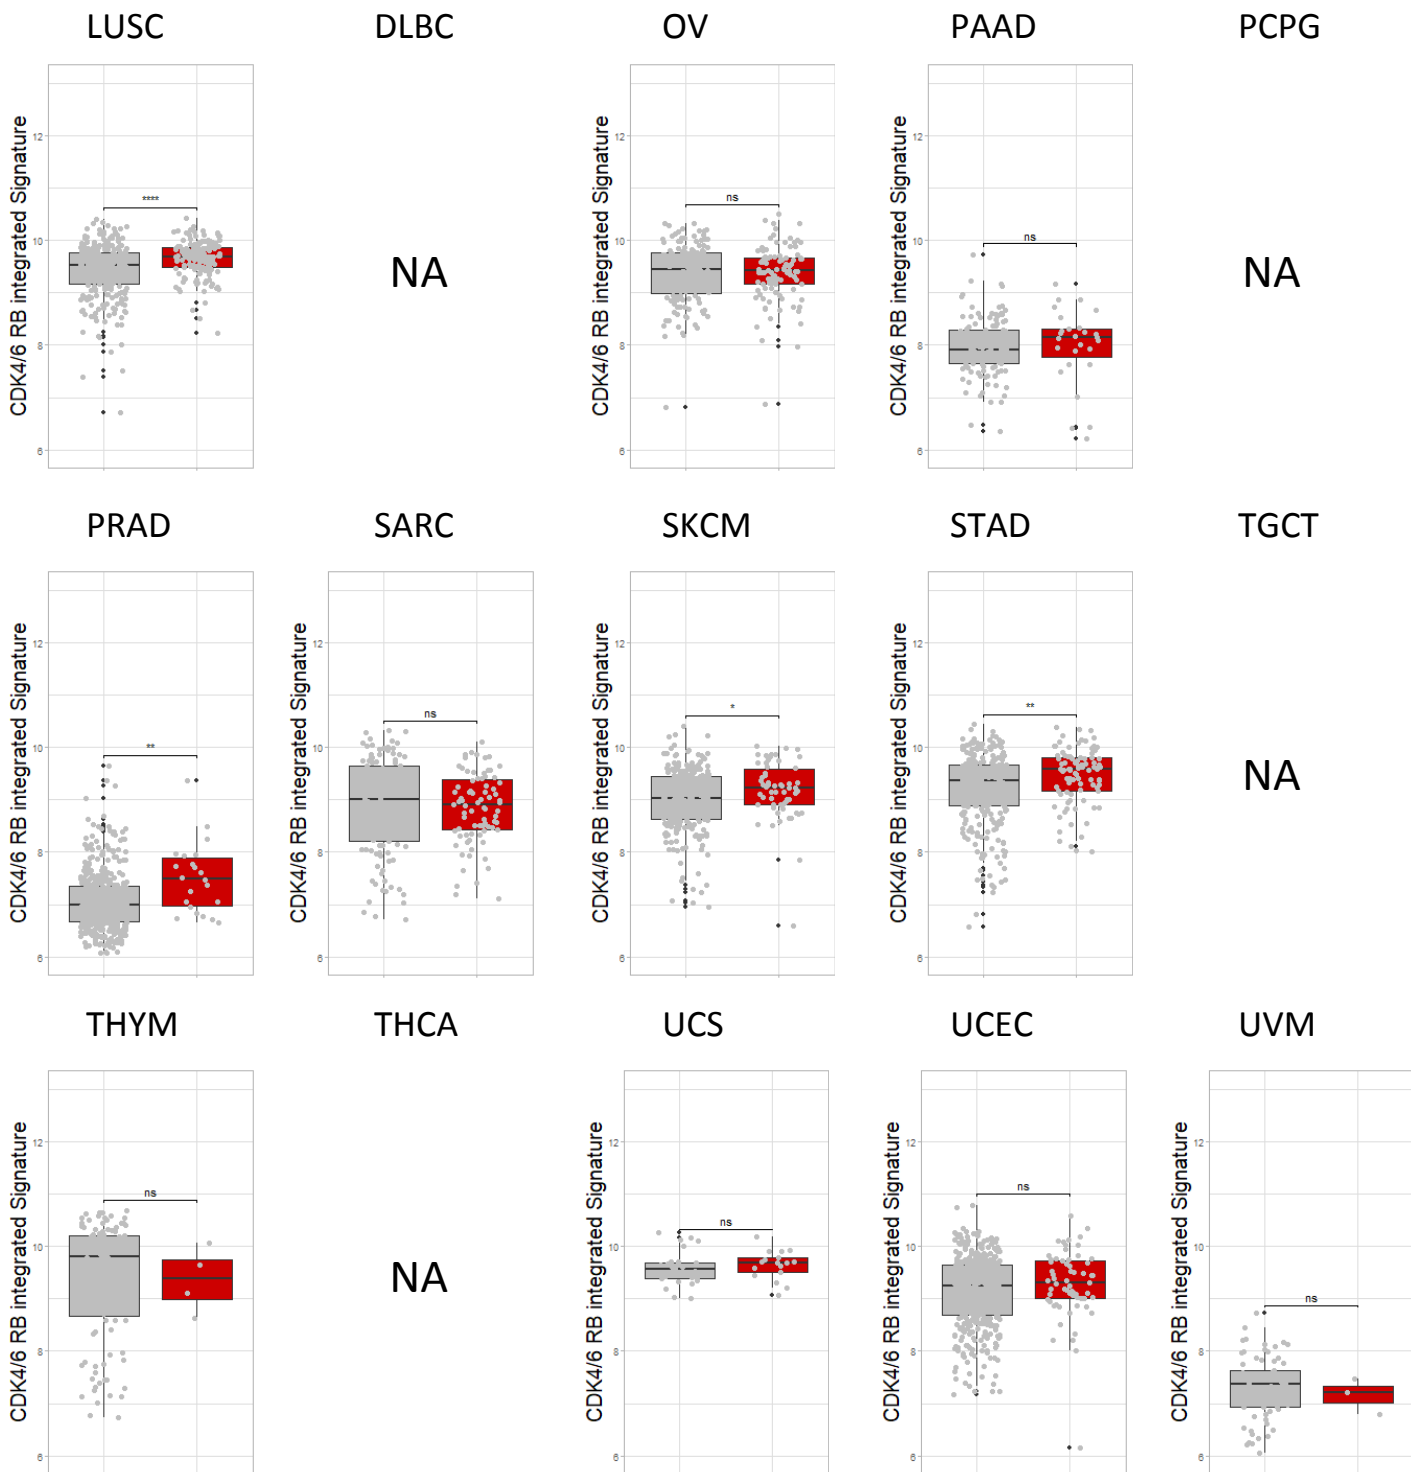

**Supplementary Figure 21:** Analysis of the CDK4/6 RB integrated signature stratified by amplification of CDK4. The number of cases in each group is shown. Statistical significance was determined by two-sided Student's t-test.

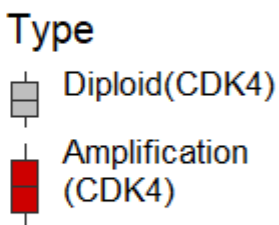

### LAML

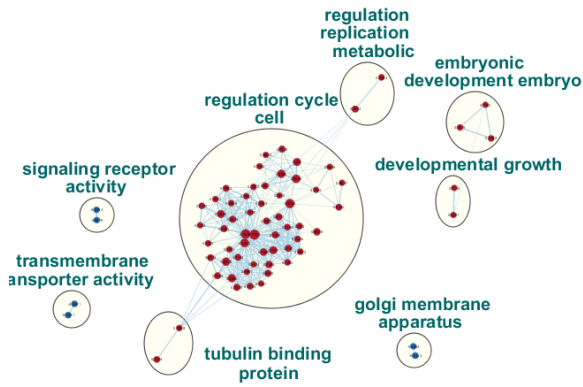

### ACC

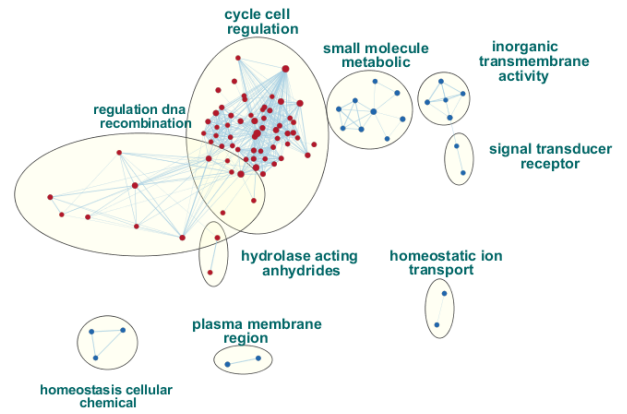

### BLCA

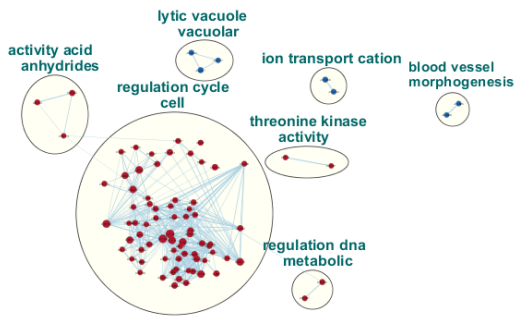

### LGG

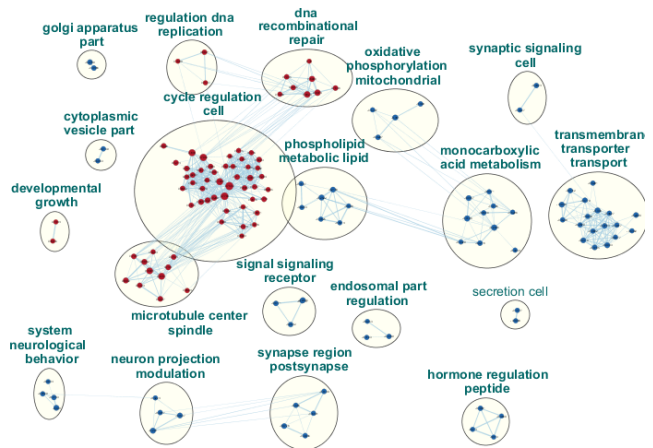

### CESC

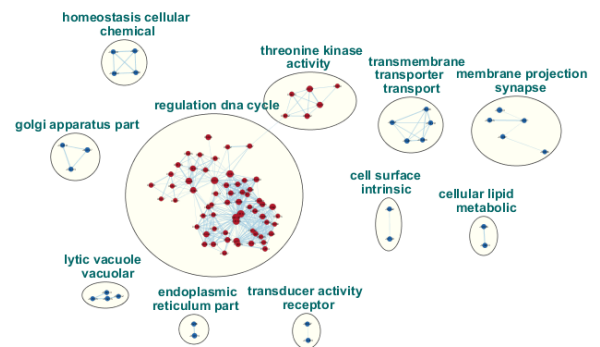

### BRCA

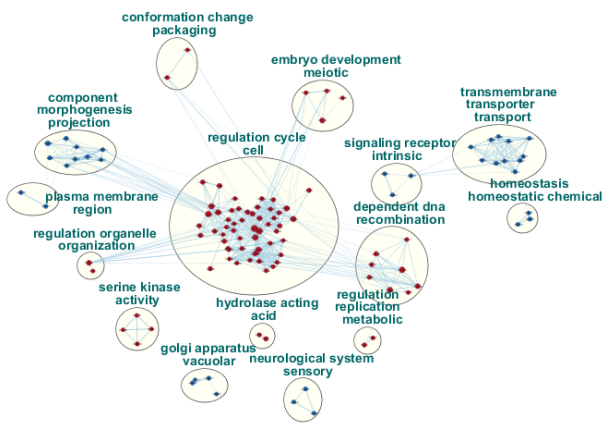

### CHOL

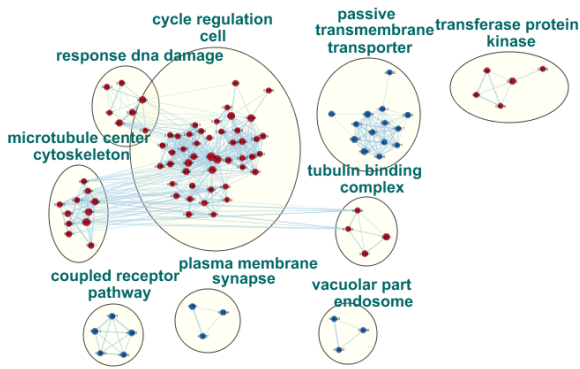

### COAD

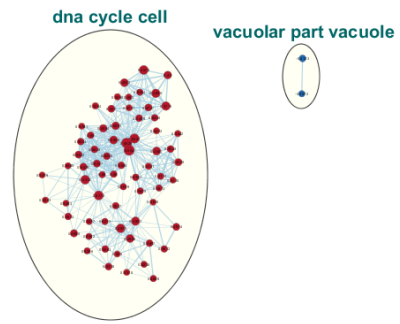

### ESCA

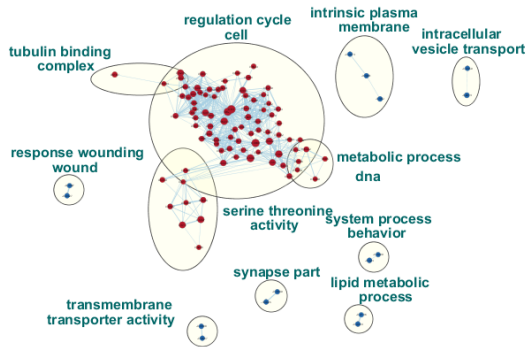

### GBM

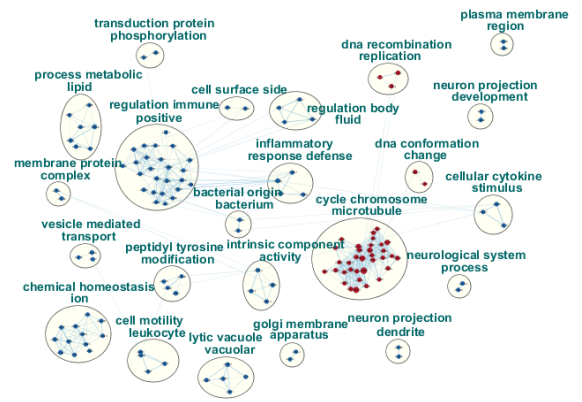

### HNSC

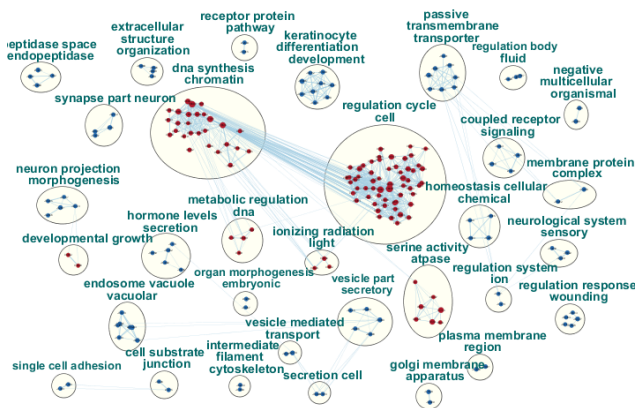

### KICH

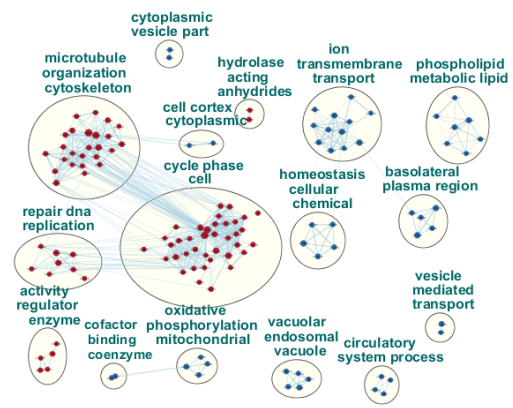

KIRC

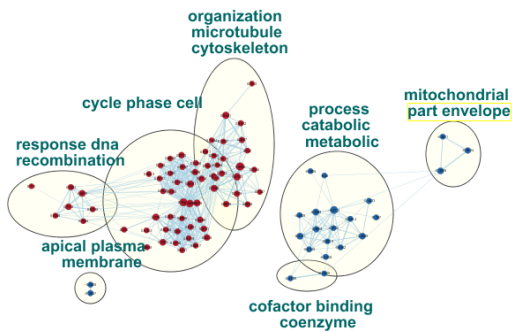

KIRP

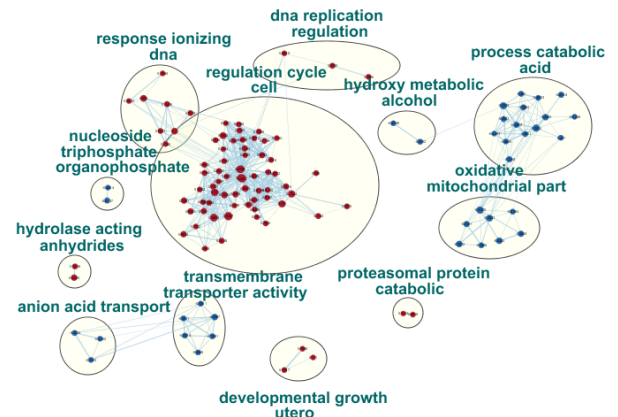

LIHC

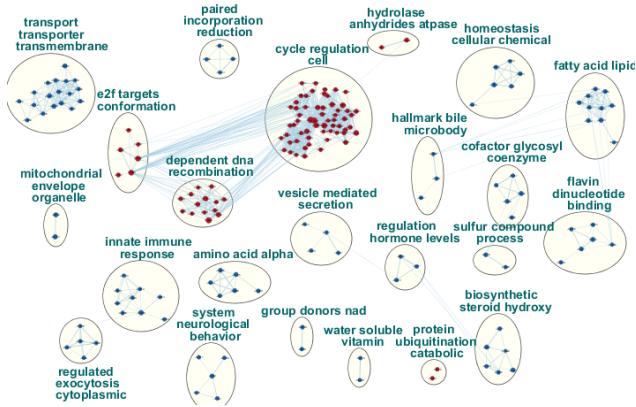

LUAD

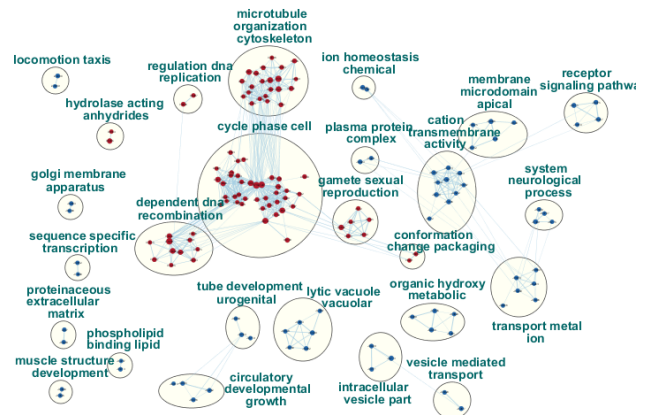

LUSC

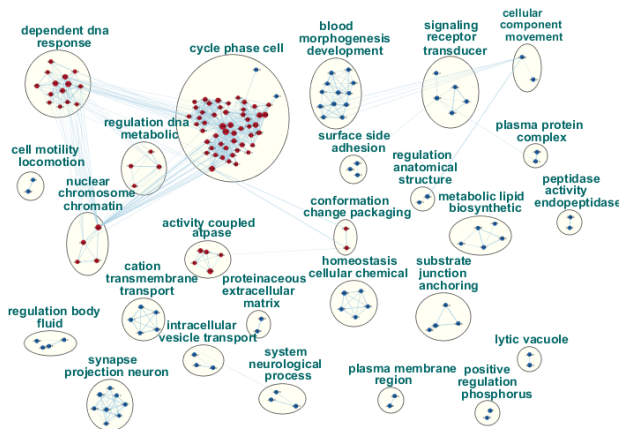

DLBC

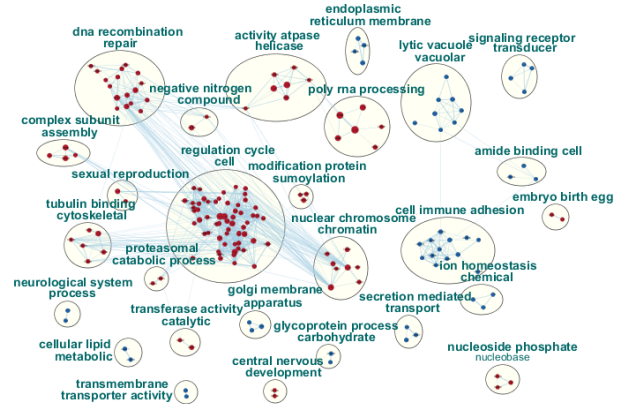

OV

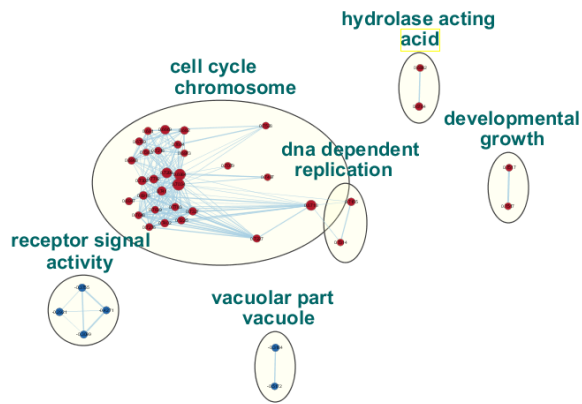

PAAD

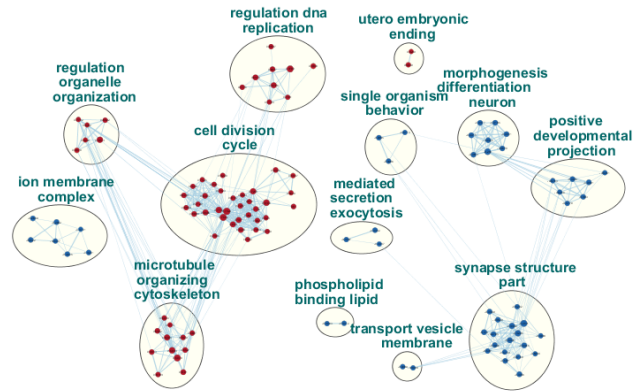

PCPG

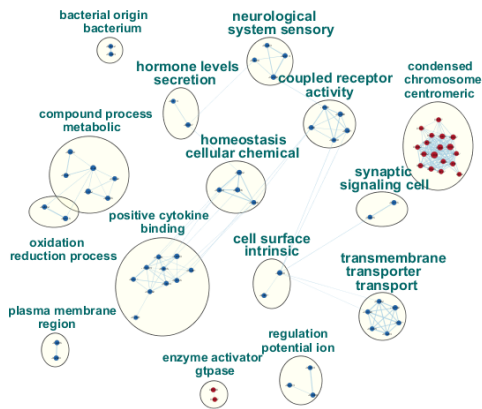

PRAD

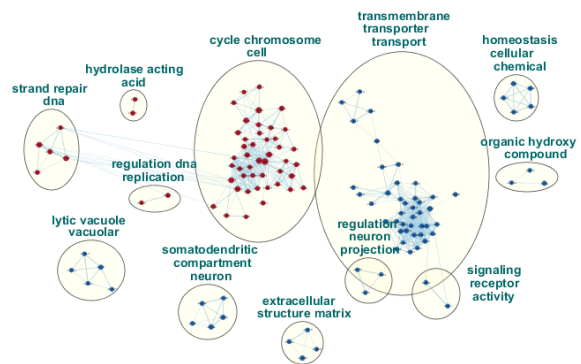

SARC

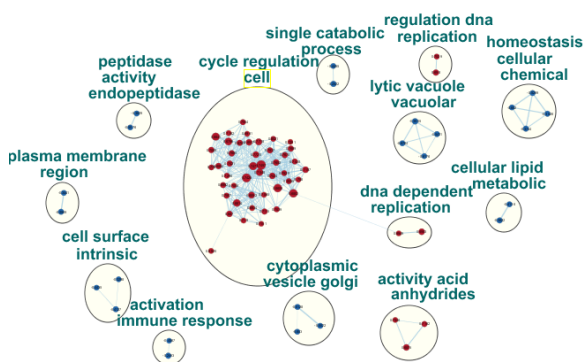

SKCM

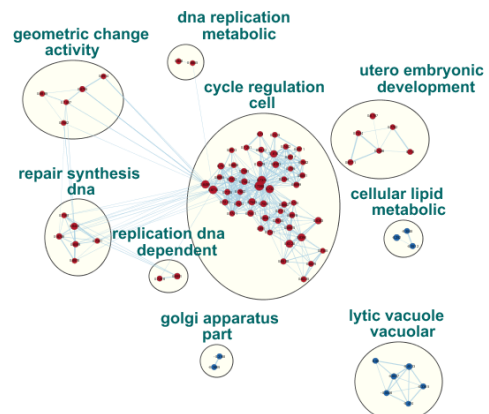

### STAD

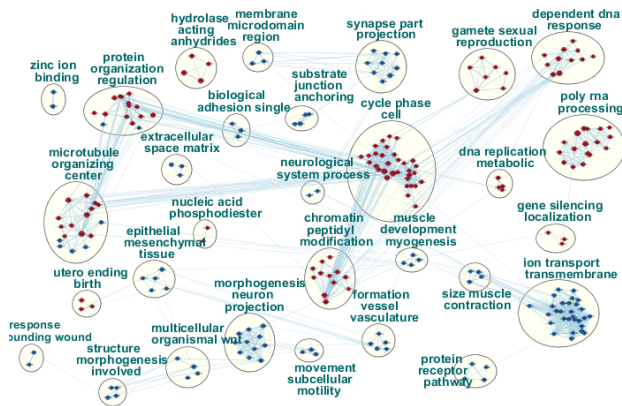

### TGCT

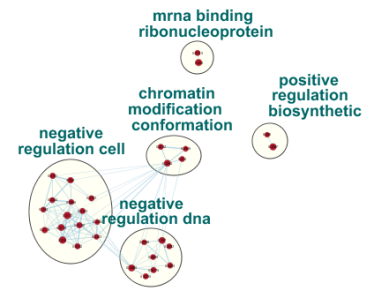

### THYM

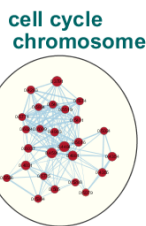

### THCA

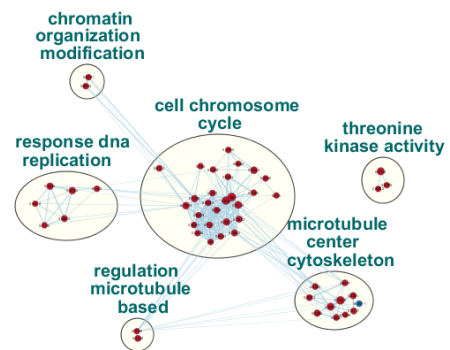

### UCS

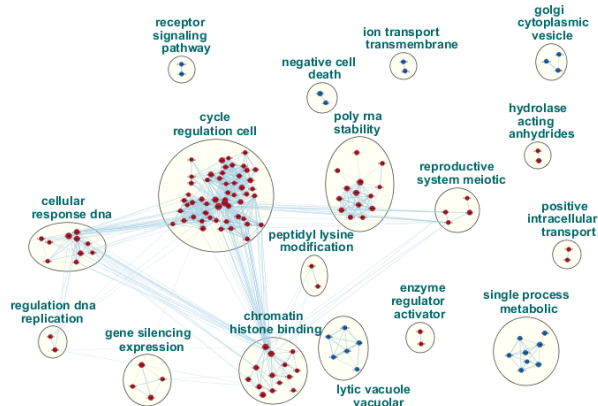

### UCES

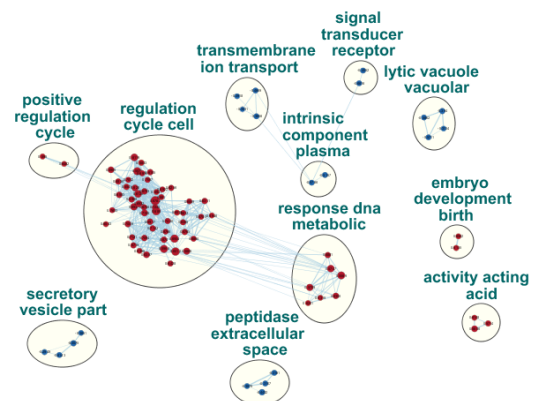

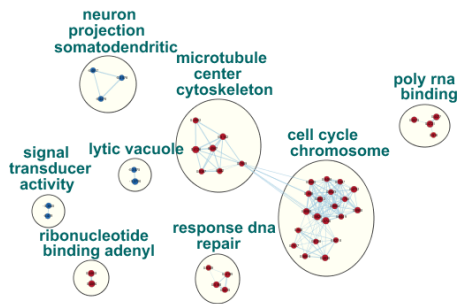

**Supplementary Figure 22:** Network maps of gene defined as positively (red) or inversely (blue) correlated with the CDK4/6-RB integrated signature in the individual tumor types. Genes were identified using bootstrapping to define significantly associated genes. Networks were developed using ranked gene set enrichment analysis and Cytoscape.

| Term         | P-value  |
|--------------|----------|
| MYC_ENCODE   | 1.22E-80 |
| E2F4_ENCODE  | 1.81E-76 |
| MAX_ENCODE   | 1.81E-62 |
| TAF1_ENCODE  | 2.12E-59 |
| E2F4_ENCODE  | 1.32E-76 |
| SIN3A_ENCODE | 3.34E-15 |
| NFYB_ENCODE  | 2.22E-14 |
| E2F6_ENCODE  | 2.38E-13 |
| MAX_ENCODE   | 1.25E-54 |
| MYC_ENCODE   | 5.28E-39 |
| TAF1_ENCODE  | 1.79E-31 |
| E2F6_ENCODE  | 1.70E-30 |

| Term       | P-value  |
|------------|----------|
| RUNX1_CHEA | 1.69E-04 |
| IRF8_CHEA  | 4.13E-04 |
| GATA1_CHEA | 8.60E-04 |
| GATA2_CHEA | 0.0044   |
| SUZ12_CHEA | 2.41E-16 |
| GATA2_CHEA | 4.33E-09 |
| ESR1_CHEA  | 6.83E-09 |
| AR_CHEA    | 4.41E-08 |

**Supplementary Figure 23:** Enrichment of transcription factor binding sites of genes in the clusters of correlated genes from Figure 5B. Analysis was performed using ENRICH and top terms and associated p-values are summarized in the table.



| A      | B      | Neither | A Not B | B Not A | Both | Log2 Odds Ratio | p-Value | q-Value | Tendency           |
|--------|--------|---------|---------|---------|------|-----------------|---------|---------|--------------------|
| CDKN2A | CDKN2B | 8475    | 435     | 23      | 1256 | .3              | .0001   | <.0001  | Co-occurrence      |
| CCND1  | CDKN2A | 8048    | 450     | 1447    | 244  | 1.593           | .0001   | <.0001  | Co-occurrence      |
| CCND1  | CDKN2B | 8387    | 523     | 1108    | 171  | 1.307           | .0001   | <.0001  | Co-occurrence      |
| RB1    | RBL2   | 9247    | 706     | 174     | 62   | 2.222           | .0001   | <.0001  | Co-occurrence      |
| RBL1   | RBL2   | 9685    | 268     | 205     | 31   | 2.45            | .0001   | <.0001  | Co-occurrence      |
| RB1    | CDKN2A | 7794    | 704     | 1627    | 64   | -1.199          | .0001   | <.0001  | Mutual exclusivity |
| RB1    | CDKN2B | 8189    | 721     | 1232    | 47   | -1.207          | .0001   | <.0001  | Mutual exclusivity |
| RB1    | RBL1   | 9176    | 714     | 245     | 54   | 1.502           | .0001   | <.0001  | Co-occurrence      |
| CCND2  | CDK4   | 9671    | 234     | 257     | 27   | 2.118           | .0001   | <.0001  | Co-occurrence      |
| CDKN2B | CDKN2C | 8818    | 1237    | 92      | 42   | 1.702           | .0001   | <.0001  | Co-occurrence      |
| CCND1  | CDK6   | 9284    | 651     | 211     | 43   | 1.539           | .0001   | <.0001  | Co-occurrence      |
| CCND2  | RBL2   | 9715    | 238     | 213     | 23   | 2.14            | .0001   | <.0001  | Co-occurrence      |
| CDK6   | CDKN2A | 8317    | 181     | 1618    | 73   | 1.052           | .0001   | <.0001  | Co-occurrence      |
| RB1    | CDKN2C | 9313    | 742     | 108     | 26   | 1.595           | .0001   | <.0001  | Co-occurrence      |
| CDK6   | CDKN2B | 8713    | 197     | 1222    | 57   | 1.045           | .0001   | <.0001  | Co-occurrence      |
| CDKN2A | CDKN2C | 8407    | 1648    | 91      | 43   | 1.269           | .0001   | <.0001  | Co-occurrence      |
| CDK6   | RBL2   | 9717    | 236     | 218     | 18   | 1.765           | .0001   | <.0001  | Co-occurrence      |
| CCND2  | RB1    | 9198    | 223     | 730     | 38   | 1.102           | .0001   | <.0001  | Co-occurrence      |
| CCND1  | RBL2   | 9291    | 662     | 204     | 32   | 1.139           | .0001   | <.0001  | Co-occurrence      |
| CCND1  | CDK4   | 9246    | 659     | 249     | 35   | 0.98            | .0001   | 0.001   | Co-occurrence      |
| CCND1  | RBL1   | 9232    | 658     | 263     | 36   | 0.941           | .0001   | 0.002   | Co-occurrence      |
| CCND2  | RBL1   | 9647    | 243     | 281     | 18   | 1.347           | .0001   | 0.002   | Co-occurrence      |
| CCND2  | CDK6   | 9690    | 245     | 238     | 16   | 1.411           | .0001   | 0.002   | Co-occurrence      |
| CCND3  | CDK4   | 9679    | 226     | 268     | 16   | 1.354           | 0.001   | 0.003   | Co-occurrence      |
| CDK6   | RBL1   | 9653    | 237     | 282     | 17   | 1.296           | 0.001   | 0.003   | Co-occurrence      |
| CCND1  | RB1    | 8760    | 661     | 735     | 33   | -0.749          | 0.002   | 0.004   | Mutual exclusivity |
| CDKN2B | CDKN2D | 8742    | 1269    | 168     | 10   | -1.286          | 0.002   | 0.004   | Mutual exclusivity |
| CCND3  | RBL1   | 9664    | 226     | 283     | 16   | 1.274           | 0.002   | 0.005   | Co-occurrence      |
| CDKN2A | CDKN2D | 8336    | 1675    | 162     | 16   | -1.025          | 0.002   | 0.005   | Mutual exclusivity |
| CDK4   | RBL2   | 9684    | 269     | 221     | 15   | 1.289           | 0.003   | 0.006   | Co-occurrence      |
| CCND2  | CDKN2A | 8298    | 200     | 1630    | 61   | 0.635           | 0.003   | 0.006   | Co-occurrence      |
| CCND2  | CDKN2B | 8697    | 213     | 1231    | 48   | 0.671           | 0.004   | 0.008   | Co-occurrence      |
| CDK4   | RBL1   | 9623    | 267     | 282     | 17   | 1.119           | 0.004   | 0.008   | Co-occurrence      |
| CCND1  | CCND2  | 9262    | 666     | 233     | 28   | 0.741           | 0.011   | 0.021   | Co-occurrence      |
| CDK4   | CDKN2C | 9780    | 275     | 125     | 9    | 1.356           | 0.013   | 0.024   | Co-occurrence      |
| RB1    | CDKN2D | 9265    | 746     | 156     | 22   | 0.809           | 0.015   | 0.027   | Co-occurrence      |
| CCND2  | CDKN2C | 9802    | 253     | 126     | 8    | 1.299           | 0.022   | 0.038   | Co-occurrence      |
| CCND2  | CCND3  | 9698    | 249     | 230     | 12   | 1.023           | 0.022   | 0.038   | Co-occurrence      |
| CCND3  | RBL2   | 9722    | 231     | 225     | 11   | 1.041           | 0.025   | 0.043   | Co-occurrence      |
| CDKN2C | CDKN2D | 9883    | 128     | 172     | 6    | 1.429           | 0.03    | 0.049   | Co-occurrence      |
| RBL2   | CDKN2C | 9826    | 229     | 127     | 7    | 1.242           | 0.036   | 0.058   | Co-occurrence      |
| CCND3  | RB1    | 9205    | 216     | 742     | 26   | 0.578           | 0.042   | 0.065   | Co-occurrence      |
| CDK6   | RB1    | 9194    | 227     | 741     | 27   | 0.561           | 0.043   | 0.065   | Co-occurrence      |
| RBL1   | CDKN2C | 9764    | 291     | 126     | 8    | 1.091           | 0.044   | 0.065   | Co-occurrence      |
| CDK4   | CDK6   | 9663    | 272     | 242     | 12   | 0.817           | 0.052   | 0.076   | Co-occurrence      |
| CDK4   | CDKN2D | 9736    | 275     | 169     | 9    | 0.915           | 0.061   | 0.087   | Co-occurrence      |
| CCND3  | CDKN2D | 9777    | 234     | 170     | 8    | 0.975           | 0.062   | 0.087   | Co-occurrence      |
| CCND1  | CCND3  | 9276    | 671     | 219     | 23   | 0.538           | 0.065   | 0.09    | Co-occurrence      |
| CCND1  | CDKN2C | 9375    | 680     | 120     | 14   | 0.686           | 0.072   | 0.097   | Co-occurrence      |
| CCND3  | CDKN2A | 8305    | 193     | 1642    | 49   | 0.361           | 0.075   | 0.099   | Co-occurrence      |
| CCND3  | CDK6   | 9703    | 232     | 244     | 10   | 0.777           | 0.081   | 0.105   | Co-occurrence      |
| CCND3  | CDKN2C | 9819    | 236     | 128     | 6    | 0.964           | 0.1     | 0.126   | Co-occurrence      |
| RBL2   | CDKN2B | 8697    | 213     | 1256    | 23   | -0.419          | 0.109   | 0.136   | Mutual exclusivity |
| CCND1  | CDKN2D | 9333    | 678     | 162     | 16   | 0.443           | 0.155   | 0.19    | Co-occurrence      |
| CCND2  | CDKN2D | 9757    | 254     | 171     | 7    | 0.653           | 0.173   | 0.207   | Co-occurrence      |
| CDK4   | RB1    | 9154    | 267     | 751     | 17   | -0.366          | 0.188   | 0.222   | Mutual exclusivity |
| RBL2   | CDKN2D | 9781    | 230     | 172     | 6    | 0.569           | 0.231   | 0.268   | Co-occurrence      |
| RBL1   | CDKN2D | 9719    | 292     | 171     | 7    | 0.446           | 0.268   | 0.305   | Co-occurrence      |
| CDK6   | CDKN2D | 9763    | 248     | 172     | 6    | 0.458           | 0.284   | 0.318   | Co-occurrence      |
| RBL1   | CDKN2A | 8252    | 246     | 1638    | 53   | 0.118           | 0.32    | 0.352   | Co-occurrence      |
| CDK6   | CDKN2C | 9803    | 252     | 132     | 2    | -0.763          | 0.346   | 0.375   | Mutual exclusivity |
| CDK4   | CDKN2B | 8663    | 247     | 1242    | 37   | 0.063           | 0.43    | 0.458   | Co-occurrence      |
| CDK4   | CDKN2A | 8260    | 238     | 1645    | 46   | -0.043          | 0.466   | 0.484   | Mutual exclusivity |
| RBL2   | CDKN2A | 8302    | 196     | 1651    | 40   | 0.037           | 0.469   | 0.484   | Co-occurrence      |
| RBL1   | CDKN2B | 8648    | 262     | 1242    | 37   | -0.024          | 0.506   | 0.514   | Mutual exclusivity |
| CCND3  | CDKN2B | 8698    | 212     | 1249    | 30   | -0.021          | 0.519   | 0.519   | Mutual exclusivity |

**Supplementary Table 1: Mutual exclusivity analysis of the indicated RB-pathway associated genes in the full TCGA pan-cancer cohort.**
